# Supplementary material for: Insights into the dynamic control of breathing revealed through cell-type-specific responses to substance P
Source: eLife. 2019 Dec 5;8:e51350. doi: 10.7554/eLife.51350 (PMC6957314; doi:10.7554/eLife.51350)
Supplement: Figure 1—source data 1. [file elife-51350-fig1-data1.xlsx]

## Sheet: Fig.1C
		Baseline (Probability of Evoked Burst)												substance P (Probability of Evoked Burst)											Comparison of Fits : Non-Linear Regression
	Bin Center (sec)	Bio Rep #1	Bio Rep #2	Bio Rep #3	Bio Rep #4	Bio Rep #5	Bio Rep #6		Mean	SE	N		Bin Center (sec)	Bio Rep #1	Bio Rep #2	Bio Rep #3	Bio Rep #4	Bio Rep #5	Bio Rep #6		Mean	SE	N
	0.25	0.208333	0.0625	0.0238095	0.142857	0	0		0.0729167	0.0348248	6		0.25	0	0	0.2	0.0526316	0.264706	0.0476191		0.0941594	0.0454279	6		Null hypothesis			One curve for all data sets
	0.75	0.2	0.5	0	0	0.25	0.230769		0.196795	0.076023	6		0.75	0	0.470588	0.3	0.125	0.4375	0.45		0.297181	0.0798089	6		Alternative hypothesis			Different curve for each data set
	1.25	0.538462	0.75	0.285714	0.461539	0.636364	0.833333		0.584235	0.0813449	6		1.25	0.1875	0.733333	0.785714	0.555556	0.633333	0.916667		0.635351	0.103003	6		P value			0.0853
	1.75	0.9	0.909091	0.533333	0.95	1	0.666667		0.826515	0.0750714	6		1.75	0.8	0.952381	0.807692	0.9	0.95	1		0.901679	0.0335398	6		Conclusion (alpha = 0.05)			Do not reject null hypothesis
	2.25	1	1	0.833333	1	1	1		0.972222	0.0277778	6		2.25	1	1	1	1	1	1		1	0	6		Preferred model			One curve for all data sets
	2.75	1	1	0.916667	1	1	1		0.986111	0.0138889	6		2.75	1	1	1	1	1	1		1	0	6		F (DFn, DFd)			2.510 (2,125)
	3.25	1	1	1	1	1	1		1	0	6		3.25	1	1	1	1	1	1		1	0	6
	3.75	1	1	1	1	1	1		1	0	6		3.75	1	1		1	1	1		1	0	5
	4.25	1	1	1	1	1	1		1	0	6		4.25	1	1		1	1			1	0	4
	4.75	1	1	1	1	1	1		1	0	6		4.75					1			1	0	1
	5.25	1	1		1	1			1	0	4		5.25
	5.75	1	1	1		1			1	0	4		5.75	1				1			1	0	2
	6.25	1	1			1			1	0	3		6.25					1			1	0	1
	6.75		1						1	0	1		6.75					1			1	0	1
	7.25												7.25
	7.75												7.75
	8.25		1						1	0	1		8.25
		Baseline (Cummulative Probability of Spontaneous IBI)												substance P (Cummulative Probability of Spontaneous IBI)											Comparison of Fits : Non-Linear Regression
	Bin Center (sec)	Bio Rep #1	Bio Rep #2	Bio Rep #3	Bio Rep #4	Bio Rep #5	Bio Rep #6		Mean	SE	N		Bin Center (sec)	Bio Rep #1	Bio Rep #2	Bio Rep #3	Bio Rep #4	Bio Rep #5	Bio Rep #6		Mean	SE	N
	0.25	0	0.00534759	0	0	0	0.00240964		0.00129287	0.00090137	6		0.25	0	0.0042796	0.00757576	0.00223714	0	0.00539568		0.00324803	0.00124535	6		Null hypothesis			One curve for all data sets
	0.75	0.00344828	0.026738	0.0133038	0.00259067	0.00319489	0.0120482		0.0102206	0.00382583	6		0.75	0	0.0242511	0.0666667	0.00223714	0.0046729	0.00719425		0.0175037	0.0104449	6		Alternative hypothesis			Different curve for each data set
	1.25	0.00689655	0.0561497	0.0532151	0.00518135	0.00319489	0.0240964		0.024789	0.00993801	6		1.25	0.00512821	0.0499287	0.187879	0.0111857	0.0116822	0.0143885		0.0466987	0.0289837	6		P value			< 0.0001
	1.75	0.0206897	0.0802139	0.117517	0.0259067	0.00319489	0.0554217		0.0504906	0.0174448	6		1.75	0.0102564	0.0927247	0.410606	0.0357942	0.0771028	0.0863309		0.118803	0.0598039	6		Conclusion (alpha = 0.05)			Reject null hypothesis
	2.25	0.0689655	0.13369	0.215078	0.0544041	0.0159744	0.122892		0.101834	0.0288584	6		2.25	0.0769231	0.272468	0.627273	0.123042	0.186916	0.456835		0.290576	0.0867554	6		Preferred model			Different curve for each data set
	2.75	0.127586	0.213904	0.379157	0.124352	0.0543131	0.250602		0.191653	0.0471254	6		2.75	0.230769	0.580599	0.786364	0.340045	0.359813	0.80036		0.516325	0.0991364	6		F (DFn, DFd)			227.8 (2,488)
	3.25	0.231035	0.377005	0.549889	0.295337	0.108626	0.395181		0.326179	0.0618395	6		3.25	0.446154	0.830243	0.9	0.693512	0.542056	0.902878		0.71914	0.0786025	6
	3.75	0.382759	0.510695	0.733925	0.541451	0.204473	0.592771		0.494345	0.0743975	6		3.75	0.630769	0.940086	0.962121	0.894855	0.689252	0.947842		0.844154	0.059433	6
	4.25	0.527586	0.652406	0.866962	0.759067	0.341853	0.759036		0.651152	0.0776305	6		4.25	0.794872	0.987161	0.986364	0.957494	0.806075	0.976619		0.918097	0.0374791	6
	4.75	0.665517	0.745989	0.935698	0.873057	0.530351	0.884337		0.772492	0.0632553	6		4.75	0.907692	1	0.992424	0.975391	0.915888	1		0.965233	0.0173262	6
	5.25	0.813793	0.839572	0.968958	0.937824	0.731629	0.949398		0.873529	0.0382333	6		5.25	0.958974	1	0.998485	0.991051	0.96729	1		0.985967	0.00742482	6
	5.75	0.886207	0.893048	0.982262	0.974093	0.808307	0.975904		0.91997	0.0284439	6		5.75	0.984615	1	1	0.995526	0.985981	1		0.994354	0.00295492	6
	6.25	0.92069	0.933155	0.988914	0.987047	0.897764	0.99759		0.954193	0.017241	6		6.25	0.989744	1	1	1	0.990654	1		0.996733	0.0020696	6
	6.75	0.958621	0.949198	0.993348	0.992228	0.929712	0.99759		0.970116	0.0115263	6		6.75	0.989744	1	1	1	1	1		0.998291	0.0017094	6
	7.25	0.972414	0.967914	0.995565	0.994819	0.974441	0.99759		0.983791	0.00553656	6		7.25	0.994872	1	1	1	1	1		0.999145	0.000854701	6
	7.75	0.989655	0.981283	0.995565	0.997409	0.98722	1		0.991856	0.00288119	6		7.75	1	1	1	1	1	1		1	0	6
	8.25	0.993103	0.989305	0.995565	1	0.99361	1		0.995264	0.00171139	6		8.25	1	1	1	1	1	1		1	0	6
	Fig 1C inset	Baseline												substance P											Paired t test (two tailed)
		Bio Rep #1	Bio Rep #2	Bio Rep #3	Bio Rep #4	Bio Rep #5	Bio Rep #6		Mean	SE	N			Bio Rep #1	Bio Rep #2	Bio Rep #3	Bio Rep #4	Bio Rep #5	Bio Rep #6		Mean	SE	N		P value	0.0139
	Std. Err. of IBIs	1.36025	1.65261	1.1959	0.97759	1.22132	1.10069		1.251	0.09565	6			0.990817	0.747833	0.91197	0.70377	1.0804	0.657724		0.8488	0.06965	6		t, df	t=3.706 df=5
			* Bio Rep #2 is shown in Figure 1A and 1B
