# Supplementary material for: Insights into the dynamic control of breathing revealed through cell-type-specific responses to substance P
Source: eLife. 2019 Dec 5;8:e51350. doi: 10.7554/eLife.51350 (PMC6957314; doi:10.7554/eLife.51350)
Supplement: Figure 2—source data 1. [file elife-51350-fig2-data1.xlsx]

## Sheet: Fig.2C
	Spike Frequency During Inspiratory Bursts (Hz)
		Excitatory with Pre-I															Excitatory without Pre-I																			Inhibitory
	Bin Center (a.u.)	Bio Rep #1	Bio Rep #2	Bio Rep #3	Bio Rep #4	Bio Rep #5	Bio Rep #6	Bio Rep #7	Bio Rep #8	Bio Rep #9		Mean	SE	N		Bin Center (a.u.)	Bio Rep #1	Bio Rep #2	Bio Rep #3	Bio Rep #4	Bio Rep #5	Bio Rep #6	Bio Rep #7	Bio Rep #8	Bio Rep #9	Bio Rep #10	Bio Rep #11	Bio Rep #12	Bio Rep #13		Mean	SE	N		Bin Center (a.u.)	Bio Rep #1	Bio Rep #2	Bio Rep #3	Bio Rep #4	Bio Rep #5	Bio Rep #6	Bio Rep #7		Mean	SE	N
	-0.5	4.38398	3.90873	8.00619	11.2102	3.61811	6.18076	6.60991	7.91729	7.06946		6.54495	0.802604	9		-0.5	0.372956	0.251041	0.13911	0.334754	0.312816	0.232037	0.384061	0.50931	0.246299	0.50653	0.216547	0.547585	0.151432		0.323421	0.0374864	13		-0.5	0.529583	0.305338	0.184815	1.65769	0.248743	0.375329	0.20112		0.500374	0.197988	7
	-0.45	4.55009	4.22619	8.25331	10.7684	3.61811	6.18196	7.3102	7.66169	7.09359		6.62929	0.753513	9		-0.45	0.372956	0.251041	0.13911	0.334754	0.312816	0.232037	0.384061	0.50931	0.246299	0.50653	0.216547	0.547585	0.151432		0.323421	0.0374864	13		-0.45	0.529583	0.305338	0.184815	1.65769	0.248743	0.375329	0.20112		0.500374	0.197988	7
	-0.4	5.25505	5.15548	8.95041	11.286	4.18867	6.0674	7.22049	7.61826	7.11857		6.98448	0.724923	9		-0.4	0.372956	0.251041	0.13911	0.334754	0.312816	0.232037	0.384061	0.50931	0.246299	0.50653	0.216547	0.547585	0.151432		0.323421	0.0374864	13		-0.4	0.529583	0.305338	0.184815	1.65769	0.248743	0.375329	0.20112		0.500374	0.197988	7
	-0.35	5.25505	5.15548	8.52273	10.0771	4.69734	6.73509	7.23158	7.03101	6.95047		6.85065	0.570859	9		-0.35	0.372956	0.251041	0.13911	0.334754	0.312816	0.232037	0.384061	0.50931	0.246299	0.50653	0.216547	0.547585	0.151432		0.323421	0.0374864	13		-0.35	0.529583	0.305338	0.184815	1.65769	0.248743	0.375329	0.20112		0.500374	0.197988	7
	-0.3	5.88431	6.01555	8.80358	10.6203	4.69734	7.68163	6.60954	6.7167	7.13491		7.12931	0.582624	9		-0.3	0.372956	0.251041	0.13911	0.334754	0.312816	0.232037	0.384061	0.50931	0.246299	0.50653	0.216547	0.547585	0.151432		0.323421	0.0374864	13		-0.3	0.529583	0.305338	0.184815	1.65769	0.248743	0.375329	0.20112		0.500374	0.197988	7
	-0.25	6.97378	6.01555	8.80129	10.9868	4.69734	7.27361	6.64283	6.75366	7.12491		7.25219	0.590636	9		-0.25	0.372956	0.251041	0.13911	0.334754	0.312816	0.232037	0.384061	0.97867	0.246299	0.50653	0.216547	0.547585	0.151432		0.359526	0.0618655	13		-0.25	0.529583	0.305338	0.184815	1.65769	0.248743	0.375329	0.20112		0.500374	0.197988	7
	-0.2	9.13725	8.02234	10.5232	11.1661	6.02512	7.54976	6.5459	7.05272	7.78096		8.20037	0.583164	9		-0.2	0.372956	0.251041	0.13911	0.334754	0.312816	0.232037	0.384061	0.97867	0.246299	0.50653	0.216547	0.547585	0.151432		0.359526	0.0618655	13		-0.2	0.529583	0.305338	0.184815	1.65769	0.248743	0.375329	0.20112		0.500374	0.197988	7
	-0.15	11.0668	8.98384	11.7621	13.3832	6.02512	8.50448	7.02308	7.10068	8.0106		9.09555	0.821766	9		-0.15	0.372956	0.251041	0.13911	0.334754	0.312816	0.232037	0.384061	0.97867	0.246299	0.50653	0.216547	0.547585	0.151432		0.359526	0.0618655	13		-0.15	0.529583	0.305338	0.184815	1.65769	0.248743	0.375329	0.20112		0.500374	0.197988	7
	-0.1	14.3633	14.6312	12.8841	14.8023	7.25916	10.2216	7.71449	7.43192	8.07312		10.8201	1.11122	9		-0.1	0.372956	0.251041	0.13911	0.334754	0.312816	0.232037	0.384061	0.97867	0.246299	0.50653	0.216547	0.547585	0.151432		0.359526	0.0618655	13		-0.1	0.529583	0.305338	0.184815	1.65769	0.248743	0.375329	0.20112		0.500374	0.197988	7
	-0.05	16.2803	21.4458	17.4187	19.0581	7.25916	11.8825	7.71449	7.68277	8.07312		12.9794	1.87455	9		-0.05	0.372956	0.251041	0.13911	0.334754	0.312816	0.232037	0.384061	0.97867	0.246299	0.50653	0.216547	0.547585	0.151432		0.359526	0.0618655	13		-0.05	0.529583	0.305338	0.184815	1.65769	0.248743	0.375329	0.20112		0.500374	0.197988	7
	0	17.6182	24.6333	18.7289	23.7365	7.25916	17.8022	8.09189	7.68277	8.32126		14.8749	2.36699	9		0	0.372956	0.251041	0.13911	0.334754	0.312816	0.232037	0.384061	0.97867	1.98923	0.50653	30.7134	0.547585	0.151432		2.83951	2.32685	13		0	0.529583	0.305338	0.184815	1.65769	0.248743	0.375329	0.20112		0.500374	0.197988	7
	0.05	29.4456	50.766	19.6945	26.0431	15.0619	26.6174	18.9209	12.4197	12.0856		23.4505	4.00462	9		0.05	30.9996	20.7605	47.8752	14.3741	21.0645	39.4538	57.9558	24.6384	51.7172	27.8402	68.2795	15.8095	34.5448		35.0241	4.71295	13		0.05	42.5214	37.8417	62.7642	61.7434	37.9892	18.0065	69.7782		47.2349	6.91803	7
	0.1	30.4213	50.6744	18.9379	28.8667	15.0619	27.858	16.2147	11.941	12.0856		23.5624	4.15515	9		0.1	37.4451	18.3983	56.5521	14.3741	20.5041	55.2757	69.8815	22.9307	38.582	31.4691	62.0903	15.8095	49.7775		37.93	5.30443	13		0.1	54.5468	52.0736	60.809	59.7623	40.1933	18.0065	71.8588		51.0358	6.59575	7
	0.15	38.7494	66.0055	19.7775	37.6337	13.7629	31.4277	17.9819	11.3922	12.1043		27.6483	5.96584	9		0.15	54.559	17.8227	52.751	14.3741	26.887	59.6726	75.8883	20.367	34.5939	36.7658	47.8343	15.8095	64.1601		40.1142	5.67566	13		0.15	83.5137	49.0919	59.5416	59.6455	55.9365	17.5982	67.5672		56.1278	7.62038	7
	0.2	38.4894	64.8078	25.163	37.9151	12.7076	25.7501	17.0526	11.6687	13.7498		27.4782	5.77025	9		0.2	54.3007	15.2455	49.3645	15.2946	30.8335	59.3712	65.6648	23.9138	26.6835	39.4524	49.6406	16.4358	73.2022		39.9541	5.5587	13		0.2	86.0697	49.8656	59.0442	59.1277	62.8203	16.1371	66.1144		57.0256	8.00501	7
	0.25	39.2652	69.1421	27.2104	44.8742	12.977	24.4643	19.6763	14.5312	15.4919		29.737	6.14989	9		0.25	55.0835	15.0305	56.3426	14.066	24.9627	58.519	57.073	20.5419	33.1543	40.0069	46.656	13.8397	74.5177		39.2149	5.65505	13		0.25	94.5582	60.8442	54.2621	54.0334	83.4793	15.1783	60.3165		60.3817	9.54045	7
	0.3	39.9507	65.5205	36.8917	44.6111	12.3315	25.6877	20.6329	15.6085	17.5834		30.9798	5.76492	9		0.3	54.9974	16.2134	63.4447	11.5023	25.0104	56.9294	54.9289	25.7697	44.0709	38.7797	49.4171	14.4226	77.7662		41.0194	5.80831	13		0.3	103.904	51.4054	49.0412	47.9934	95.6798	15.7156	57.9453		60.2407	11.4472	7
	0.35	43.3492	61.9804	30.6234	46.5229	12.3315	27.0239	20.2139	17.2428	20.0312		31.0355	5.45642	9		0.35	57.4442	18.3336	63.722	10.5161	22.6274	56.2761	51.4442	25.6968	50.4734	36.3076	49.0279	14.4226	74.5751		40.8359	5.74758	13		0.35	100.807	53.6502	43.5244	42.5837	98.6239	17.008	55.8059		58.8576	11.5768	7
	0.4	51.6653	63.1423	30.1069	49.3262	11.6225	30.6841	24.9192	18.3704	22.5965		33.6037	5.74758	9		0.4	53.7921	21.7893	62.0286	10.1319	22.7962	55.66	47.3345	32.9285	50.8109	39.111	45.6524	14.6968	76.1486		40.9908	5.44674	13		0.4	100.453	43.2744	40.9241	40.5928	114.735	17.7049	56.2348		59.1312	13.3188	7
	0.45	46.7509	55.119	31.6462	60.3434	13.096	30.8884	24.7371	19.9131	25.9212		34.2684	5.40529	9		0.45	48.007	21.7141	62.3935	10.1724	20.2891	51.5048	44.6656	23.0689	52.0299	37.3957	46.2644	16.0283	68.1671		38.5924	5.15899	13		0.45	85.3367	38.1738	37.9267	38.4402	113.012	18.2731	59.0875		55.75	12.4367	7
	0.5	45.1824	61.274	30.9636	57.7329	15.3439	31.2222	21.438	20.8659	29.0864		34.7899	5.45943	9		0.5	50.4241	27.0264	58.7646	10.8604	20.3052	51.7496	40.7306	22.0672	51.2859	34.4646	44.4076	16.0224	71.1469		38.4043	5.0736	13		0.5	105.83	39.0195	37.9374	38.398	110.394	17.5509	53.8138		57.5634	13.6558	7
	0.55	45.1143	56.6997	27.9624	54.7407	13.0803	32.394	23.9378	23.4847	31.621		34.3372	4.94709	9		0.55	46.531	18.9673	56.0043	10.59	20.9731	53.3858	40.0408	19.6449	51.6114	30.834	45.6838	15.4397	60.4139		36.1631	4.83136	13		0.55	87.3484	42.1383	35.6238	35.3693	99.4156	19.5046	49.387		52.6839	11.1262	7
	0.6	45.7224	53.1857	28.3783	61.0939	12.1139	32.1122	27.2561	21.5341	31.6458		34.7825	5.21038	9		0.6	41.3712	21.3731	54.7117	10.4013	20.2257	53.08	38.8675	21.2844	51.2128	34.0183	42.7657	17.3919	63.8362		36.1954	4.67899	13		0.6	80.9926	31.1657	33.5919	32.6885	105.027	18.0605	48.122		49.9498	11.8882	7
	0.65	44.5213	49.9243	30.5391	52.1811	10.2999	32.3197	20.615	19.9282	26.5403		31.8743	4.80666	9		0.65	41.5892	18.0039	54.4128	9.52532	19.896	52.0127	35.1284	18.2782	42.4544	33.8035	43.7204	17.4551	60.7563		34.3874	4.56764	13		0.65	77.2881	30.7498	28.5202	29.4316	109.658	19.1911	41.8736		48.1018	12.4869	7
	0.7	43.6272	42.968	25.7105	51.2092	9.56491	29.2076	20.3748	18.5699	23.2792		29.3901	4.57262	9		0.7	36.1694	13.8754	55.788	9.10419	18.6672	49.4304	31.5526	19.4078	46.9177	38.8128	40.8234	15.7688	55.3816		33.2076	4.53923	13		0.7	73.0806	28.8314	25.2675	26.3005	96.596	16.0447	41.5563		43.9538	11.2268	7
	0.75	39.3779	47.0041	25.8999	42.7262	9.88359	28.8194	16.3435	18.81	22.815		27.9644	4.22946	9		0.75	31.6993	17.3767	49.6581	9.66515	21.9293	45.6964	30.2121	23.8875	43.4616	31.2167	37.8118	14.1506	52.4525		31.4783	3.82446	13		0.75	66.1428	29.6958	24.3481	25.3109	90.5776	16.5599	40.7242		41.9085	10.157	7
	0.8	39.1826	39.9975	26.3649	41.0258	9.60167	29.1191	14.1085	16.3918	20.851		26.2936	3.96812	9		0.8	32.3322	22.1861	45.6348	9.81625	21.8469	40.1478	27.7137	18.8868	39.9615	36.0795	41.3528	15.0597	56.717		31.3642	3.75056	13		0.8	56.7372	27.0965	23.2861	24.3117	92.2846	14.8117	38.8772		39.6293	10.1659	7
	0.85	32.9896	33.6794	20.9095	29.528	9.60167	27.2143	12.3493	16.7979	16.3205		22.1545	3.00043	9		0.85	24.1629	15.6577	48.0297	10.3935	17.4722	39.5893	26.8793	17.7706	38.3217	33.3859	40.1974	15.918	46.221		28.7692	3.56612	13		0.85	52.0166	30.179	25.4524	26.9985	75.5854	12.8099	32.4237		36.4951	7.86578	7
	0.9	27.3549	32.5102	17.1062	31.7805	9.60167	23.2754	12.7184	14.9563	14.6338		20.4375	2.84347	9		0.9	24.7573	13.9114	40.2143	10.1372	15.4914	36.005	22.7852	12.5207	34.3024	28.7979	34.6586	16.6006	43.6915		25.6826	3.15789	13		0.9	47.2983	26.2564	28.3501	29.8931	70.5014	13.0892	26.9897		34.6255	7.07379	7
	0.95	24.4549	25.856	19.2935	21.6283	10.6561	19.8045	13.731	14.7655	14.9308		18.3467	1.71769	9		0.95	21.6835	13.6663	38.2179	10.1372	16.9642	29.6242	24.2124	15.091	29.9561	23.3526	33.4639	18.532	28.2286		23.3177	2.31247	13		0.95	37.6683	20.9553	29.914	29.8931	60.045	13.1684	28.0784		31.3889	5.59936	7
	1	23.1646	25.856	3.40292	22.4227	10.6561	20.2219	13.731	15.5897	14.9308		16.664	2.34901	9		1	22.3952	13.6663	41.899	10.1372	16.1605	30.7753	24.2124	17.2233	31.1191	24.3303	27.8372	16.2126	32.5853		23.7349	2.49897	13		1	39.3878	23.0261	29.914	29.8931	45.8776	13.1684	25.5		29.5382	4.05598	7
	1.05	0.371733	0.551969	3.40292	5.35773	1.25195	3.13152	5.14265	5.41179	3.28629		3.10095	0.667633	9		1.05	0.849456	0.201315	0.138991	0.254206	0.292583	0.271517	0.09663	0.45598	0.20961	1.79855	0.184438	0.530569	0.154876		0.418363	0.12824	13		1.05	0.344761	0.305585	0.185623	0.188546	0.174439	0.381167	0.203192		0.254759	0.0327098	7
	1.1	0.371733	0.551969	3.46958	5.35773	1.25195	3.13152	5.14265	5.41179	3.33629		3.11391	0.6683	9		1.1	0.849456	0.201315	0.138991	0.254206	0.292583	0.271517	0.09663	0.45598	0.20961	0.838518	0.184438	0.530569	0.154876		0.344515	0.0700827	13		1.1	0.344761	0.305585	0.185623	0.188546	0.174439	0.381167	0.203192		0.254759	0.0327098	7
	1.15	0.371733	0.551969	3.46958	5.35773	1.25195	1.32727	5.14265	5.41179	3.33629		2.91344	0.697088	9		1.15	0.849456	0.201315	0.138991	0.254206	0.292583	0.271517	0.09663	0.45598	0.20961	0.838518	0.184438	0.530569	0.154876		0.344515	0.0700827	13		1.15	0.344761	0.305585	0.185623	0.188546	0.174439	0.381167	0.203192		0.254759	0.0327098	7
	1.2	0.371733	0.551969	3.46958	5.49717	1.25195	1.32727	5.14265	5.41179	3.38629		2.93449	0.70444	9		1.2	0.849456	0.201315	0.138991	0.254206	0.292583	0.271517	0.09663	0.45598	0.20961	0.838518	0.184438	0.530569	0.154876		0.344515	0.0700827	13		1.2	0.344761	0.305585	0.185623	0.188546	0.174439	0.381167	0.203192		0.254759	0.0327098	7
	1.25	0.371733	0.551969	3.46958	4.74054	1.25195	1.61392	4.98154	4.89937	3.38629		2.80743	0.6289	9		1.25	0.849456	0.201315	0.138991	0.254206	0.292583	0.271517	0.09663	0.45598	0.20961	0.838518	0.184438	0.530569	0.154876		0.344515	0.0700827	13		1.25	0.344761	0.305585	0.185623	0.188546	0.174439	0.381167	0.203192		0.254759	0.0327098	7
	1.3	0.371733	0.551969	3.53346	4.61397	1.25195	1.61392	4.98154	4.47649	3.43629		2.75904	0.607149	9		1.3	0.849456	0.201315	0.138991	0.254206	0.292583	0.271517	0.09663	0.45598	0.20961	0.838518	0.184438	0.530569	0.154876		0.344515	0.0700827	13		1.3	0.344761	0.305585	0.185623	0.188546	0.174439	0.381167	0.203192		0.254759	0.0327098	7
	1.35	0.371733	0.551969	3.53346	5.68439	1.25195	1.09237	4.95402	4.38275	3.37293		2.79951	0.67282	9		1.35	0.849456	0.201315	0.138991	0.254206	0.292583	0.271517	0.09663	0.45598	0.20961	0.503324	0.184438	0.530569	0.154876		0.31873	0.0587664	13		1.35	0.344761	0.305585	0.185623	0.188546	0.174439	0.381167	0.203192		0.254759	0.0327098	7
	1.4	0.371733	0.551969	3.43531	5.24904	1.25195	1.09237	4.52408	4.81809	3.42293		2.74639	0.646264	9		1.4	0.849456	0.201315	0.138991	0.254206	0.292583	0.271517	0.09663	0.45598	0.20961	0.503324	0.184438	0.530569	0.154876		0.31873	0.0587664	13		1.4	0.344761	0.305585	0.185623	0.188546	0.174439	0.381167	0.203192		0.254759	0.0327098	7
	1.45	0.371733	0.551969	3.48597	4.7275	1.25195	1.09237	4.71327	4.80319	3.49753		2.72172	0.62974	9		1.45	0.617039	0.201315	0.138991	0.254206	0.292583	0.271517	0.09663	0.45598	0.20961	0.503324	0.184438	0.530569	0.154876		0.300852	0.0468158	13		1.45	0.344761	0.305585	0.185623	0.188546	0.174439	0.381167	0.203192		0.254759	0.0327098	7
	1.5	0.371733	0.551969	3.63427	5.22036	1.25195	1.09237	4.66508	5.64396	3.52487		2.88406	0.695673	9		1.5	0.691864	0.201315	0.138991	0.254206	0.292583	0.271517	0.09663	0.45598	0.20961	0.503324	0.184438	0.530569	0.154876		0.306608	0.0502809	13		1.5	0.344761	0.305585	0.185623	0.188546	0.174439	0.381167	0.203192		0.254759	0.0327098	7

## Sheet: Fig.2D
	Average spike frequency during bursts (Hz)																		One-way analysis of variance				Bonferroni's Multiple Comparison Test	Mean Diff.	t	Summary	95% CI of diff
	Bio Rep #1	Bio Rep #2	Bio Rep #3	Bio Rep #4	Bio Rep #5	Bio Rep #6	Bio Rep #7	Bio Rep #8	Bio Rep #9	Bio Rep #10	Bio Rep #11	Bio Rep #12	Bio Rep #13		Mean	SE	N		P value	0.0679			Pre I vs Inhib	-20.55	2.42	ns	-42.28 to 1.176
Excitatory with Pre-I	38.4389	50.8056	25.6236	42.1103	11.9678	27.8056	18.8476	16.7391	19.9152						28.03	4.357	9		F	2.989			Pre I vs No Pre I	-6.823	0.9339	ns	-25.52 to 11.87
Excitatory without Pre-I	40.9872	18.0509	52.8905	11.2787	21.2453	48.708	43.3586	21.2959	42.3538	33.8112	44.8793	15.7913	58.2145		34.85	4.307	13		R square	0.1869			Inhib vs No Pre I	13.73	1.738	ns	-6.484 to 33.94
Inhibitory	73.7751	38.2667	39.5022	39.6205	82.9216	16.3794	49.6027								48.58	8.62	7
	Average burst duration (sec)
	Bio Rep #1	Bio Rep #2	Bio Rep #3	Bio Rep #4	Bio Rep #5	Bio Rep #6	Bio Rep #7	Bio Rep #8	Bio Rep #9	Bio Rep #10	Bio Rep #11	Bio Rep #12	Bio Rep #13		Mean	SE	N		One-way analysis of variance				Bonferroni's Multiple Comparison Test	Mean Diff.	t	Summary	95% CI of diff
Excitatory with Pre-I	0.396719	0.338015	0.414507	0.480837	0.272323	0.763379	0.474954	0.590019	0.472423						0.467	0.04794	9		P value	0.0942			Pre I vs Inhib	0.151	2.249	ns	-0.02080 to 0.3227
Excitatory without Pre-I	0.485096	0.371445	0.422651	0.315939	0.400133	0.387315	0.278891	0.385511	0.513812	0.549789	0.697745	0.242048	0.389537		0.4185	0.03353	13		F	2.591			Pre I vs No Pre I	0.04856	0.8408	ns	-0.09923 to 0.1964
Inhibitory	0.302397	0.425758	0.150891	0.144049	0.517061	0.407356	0.264866								0.3161	0.05355	7		R square	0.1662			Inhib vs No Pre I	-0.1024	1.64	ns	-0.2622 to 0.05739
	Average time of max frequency (a.u.: fraction of burst duration)
	Bio Rep #1	Bio Rep #2	Bio Rep #3	Bio Rep #4	Bio Rep #5	Bio Rep #6	Bio Rep #7	Bio Rep #8	Bio Rep #9	Bio Rep #10	Bio Rep #11	Bio Rep #12	Bio Rep #13		Mean	SE	N		One-way analysis of variance				Bonferroni's Multiple Comparison Test	Mean Diff.	t	Summary	95% CI of diff
Excitatory with Pre-I	0.4	0.25	0.3	0.6	0.5	0.65	0.6	0.55	0.6						0.494444	0.04819	9		P value	0.0455			Pre I vs Inhib	0.2516	2.565	*	0.0005669 to 0.5026
Excitatory without Pre-I	0.35	0.5	0.35	0.2	0.3	0.15	0.15	0.4	0.45	0.25	0.05	0.95	0.3		0.338462	0.06206	13		F	3.488			Pre I vs No Pre I	0.156	1.848	ns	-0.06001 to 0.3720
Inhibitory	0.3	0.25	0.05	0.05	0.4	0.55	0.1								0.242857	0.0719	7		R square	0.2116			Inhib vs No Pre I	-0.0956	1.048	ns	-0.3291 to 0.1379

## Sheet: Fig.2E
	Onset Times = Neuron Burst Time - Population Burst Time
	Excitatory with Pre -I			Excitatory without Pre -I			Inhibitory
	(n)	(n+1)		(n)	(n+1)		(n)	(n+1)
	0.356	0.2368		-0.011	0.005453		0.069	0.040312
	0.2368	0.226		0.005453	0.005		0.040312	0.137344
	0.226	0.173		0.005	0.000852		0.137344	0.076813
	0.173	0.037712		0.000852	0.016352		0.076813	0.056781
	0.037712	0.127		0.016352	-0.044		0.056781	0.058688
	0.127	0.0655		-0.044	0.024		0.058688	0.079813
	0.0655	0.152		0.024	0.009148		0.079813	0.05475
	0.152	0.283		0.009148	0.019797		0.05475	0.057875
	0.283	0.1407		0.019797	0.030352		0.057875	0.070562
	0.1407	0.113		0.030352	0.021102		0.070562	0.055
	0.113	0.296		0.021102	-0.0142		0.055	0.0565
	0.296	0.216		-0.0142	0.03		0.0565	0.052031
	0.216	0.185		0.03	0.022703		0.052031	0.063531
	0.185	0.22		0.022703	0.013352		0.063531	0.059594
	0.22	0.2534		0.013352	0.028203		0.059594	0.056469
	0.2534	0.082		0.028203	0.048547		0.056469	0.061469
	0.082	0.0965		0.048547	0.055703		0.061469	0.066156
	0.0965	0.2114		0.055703	0.032156		0.066156	0.064437
	0.2114	0.181		0.032156	0.015594		0.064437	0.061312
	0.112	0.031		0.06985	0.04515		0.125344	0.120594
	0.031	0.067		0.04515	0.056602		0.120594	0.269297
	0.067	-0.015		0.056602	0.079551		0.269297	0.052547
	-0.015	0.061		0.079551	0.138398		0.052547	0.061547
	0.061	0.144		0.138398	0.067398		0.061547	0.044047
	0.144	0.115		0.067398	0.061898		0.044047	0.08
	0.115	0.0585		0.061898	0.058898		0.08	0.086563
	0.0585	0.12		0.058898	0.112852		0.086563	0.11125
	0.12	0.058		0.112852	0.009547		0.11125	0.164094
	0.058	0.092		0.009547	0.040547		0.164094	0.129156
	0.092	0.029		0.040547	0.148		0.129156	-0.02481
	0.029	0.115		0.148	0.041953		-0.02481	0.034906
	0.115	0.137		0.041953	-0.01295		0.034906	0.063562
	0.137	0.063		-0.01295	0.13075		0.063562	0.115656
	0.063	0.198		0.13075	0.114898		0.115656	0.142344
	0.198	0.046		0.114898	0.0605		0.142344	0.051938
	0.046	-0.013		0.0605	0.065453		0.051938	0.043906
	-0.013	0.0436		0.065453	0.057148		0.043906	0.092
	0.0436	0.071		0.057148	0.036		0.092	0.0355
	0.137047	0.057547		0.02	0.038703		0.051906	0.019938
	0.057547	0.068453		0.038703	0.016		0.019938	0.034156
	0.068453	0.011453		0.016	0.020656		0.034156	-0.00894
	0.011453	0.059156		0.020656	0.059406		-0.00894	-0.04925
	0.059156	-0.0187		0.059406	0.002656		-0.04925	0.069687
	-0.0187	-0.06605		0.002656	0.0065		0.069687	-0.05216
	-0.06605	0.083844		0.0065	-0.014		-0.05216	0.015094
	0.083844	-0.00984		-0.014	0.014797		0.015094	-9.4e-05
	-0.00984	-0.0332		0.014797	0.0004		-9.4e-05	0.010188
	-0.0332	-0.0163		0.0004	0.027594		0.010188	0.030937
	-0.0163	0.01325		0.027594	0.02475		0.030937	-0.02912
	0.01325	0.05275		0.02475	0.038		-0.02912	0.00325
	0.05275	0.084344		0.038	0.027344		0.00325	-0.01416
	0.084344	-0.01016		0.027344	0		-0.01416	-0.01925
	-0.01016	0.022188		0	0.035687		-0.01925	-0.04116
	0.022188	-0.02369		0.035687	0.020656		-0.04116	-0.01159
	-0.02369	0.01575		0.020656	0.007188		-0.01159	0.022844
	0.01575	-0.00309		0.007188	0.025844		0.022844	-0.00231
	-0.00309	-0.05131		0.031703	0.095102		-0.00231	0.002
	0.008844	-0.00455		0.095102	0.128898		0.030148	0.040852
	-0.00455	-0.0192		0.128898	0.073797		0.040852	0.069602
	-0.0192	-0.088		0.073797	0.152953		0.069602	0.050148
	-0.088	0.050797		0.152953	0.130844		0.050148	0.039797
	0.050797	-0.057		0.130844	0.083047		0.039797	0.042703
	-0.057	0.150453		0.083047	0.062		0.042703	0.07025
	0.150453	-0.091		0.062	0.078453		0.07025	0.058656
	-0.091	0.017656		0.078453	0.08125		0.058656	0.086344
	0.017656	-0.01516		0.08125	0.114953		0.086344	0.092594
	-0.01516	-0.0318		-0.04595	0.045203		0.092594	0.047406
	-0.0318	-0.02009		0.045203	0.056797		0.047406	0.036453
	-0.02009	0.103656		0.056797	0.027391		0.036453	0.034953
	0.103656	-0.05091		0.027391	0.0205		0.034953	0.051797
	-0.05091	-0.1134		0.0205	0.009844		0.051797	0.035706
	-0.1134	0.049797		0.009844	-0.0005		0.035706	0.040344
	0.049797	0.073297		-0.0005	0.036844		0.040344	0.038797
	0.073297	0.000547		0.036844	-0.0307		0.038797	0.042906
	0.000547	-0.0345		-0.0307	-0.0425		0.042906	0.040156
	-0.0345	0.033		-0.0425	0.011156		0.040156	0.055094
	-0.059	0.134297		0.011156	-0.02075		0.113648	0.060102
	0.134297	0.094156		-0.02075	0.044469		0.060102	0.035797
	0.094156	0.130594		0.044469	0.037219		0.035797	0.103547
	0.130594	-0.0315		0.037219	-0.01925		0.103547	0.078047
	-0.0315	0.076203		-0.01925	0.004063		0.078047	0.06475
	0.076203	0.04975		0.004063	0.064281		0.06475	0.049602
	0.04975	0.123594		0.064281	-0.02272		0.049602	0.074148
	0.123594	-0.06431		-0.02272	-0.01303		0.074148	0.032594
	-0.06431	-0.02369		-0.01303	0.022063		0.032594	0.048094
	-0.02369	0.082063		-0.02295	0.007801		0.048094	0.084547
	0.082063	0.021		0.007801	0.022602		0.084547	0.056297
	0.021	0.124312		0.022602	0.009453		0.056297	0.043344
	0.124312	0.079094		0.009453	-0.02695		0.043344	0.035906
	0.079094	0.158562		-0.02695	-0.0197		0.035906	0.060703
	0.158562	0.129		-0.0197	0.008		0.060703	0.035797
	0.129	-0.06975		0.008	-0.00345		0.035797	0.053297
	-0.06975	0.061656		-0.00345	0.030852		0.053297	0.030703
	0.061656	0.172406		0.030852	0.012305		0.030703	0.032797
	-0.114	0.055906		0.012305	0.020602		-0.02225	-0.0045
	0.055906	0.040844		0.020602	0.029063		-0.0045	0.0265
	0.040844	0.084		0.029063	0.001547		0.0265	0.008344
	0.084	0.069594		0.001547	0.024344		0.008344	-0.04294
	0.069594	0.107203		0.024344	-0.0143		-0.04294	0.032156
	0.107203	-0.00241		-0.0143	0.007203		0.032156	-0.05316
	-0.00241	-0.059		0.007203	0.024297		-0.05316	-0.04541
	-0.059	-0.0227		0.024297	0.015203		-0.04541	0.033438
	-0.0227	-0.11966		0.015203	-0.00545		0.033438	0.046344
	-0.11966	-0.02244		-0.00545	-0.04591		0.046344	-0.00019
	-0.02244	0.035594		0.060594	0.06375		-0.00019	0.031094
	0.035594	0.007937		0.06375	0.06575		0.031094	0.013312
	0.007937	-0.0315		0.06575	0.12525		0.013312	0.011812
	-0.0315	-0.00384		0.12525	0.2485		0.011812	-0.02275
	-0.00384	0.037656		0.2485	0.22625		-0.02275	0.024188
	0.037656	0.020844		0.22625	0.128156		0.024188	-0.01281
	0.020844	-0.03469		0.128156	0.137844		-0.01281	0.036906
	-0.03469	-0.02134		0.137844	0.136		0.036906	0.051813
	-0.02134	0.045312		0.136	0.0905		0.051813	0.046
	0.043	0.125297		0.0905	0.033		0.089	-0.01015
	0.125297	0.075		0.033	0.041313		-0.01015	-0.02575
	0.075	0.1495		0.041313	0.095687		-0.02575	-0.02765
	0.1495	-0.05695		0.095687	0.208687		-0.02765	-0.05675
	-0.05695	0.119		0.208687	0.143094		-0.05675	0.033102
	0.119	0.031547		0.143094	0.182406		0.033102	0.019648
	0.031547	-0.01005		0.182406	0.112437		0.019648	-0.0853
	-0.01005	0.141594		0.112437	0.12175		-0.0853	-0.07509
	0.141594	-0.0295		0.12175	0.130937		-0.07509	-0.043
	-0.0295	0.020703		0.130937	0.114094		-0.043	-0.01009
	0.020703	0.09625		0.134844	0.109703		-0.01009	0.013547
	0.09625	-0.08809		0.109703	0.070297		0.013547	-0.03675
	-0.08809	0.005406		0.070297	0.113594		-0.03675	-0.00459
	0.005406	-0.025		0.113594	0.13725		-0.00459	-0.0157
	-0.025	0.116203		0.13725	0.080156		-0.0157	0.019656
	0.116203	-0.0322		0.080156	0.051406		0.019656	0.000547
	-0.0322	0.107297		0.051406	0.05375		0.000547	0.006447
	0.107297	0.051		0.05375	0.043453		0.006447	-0.00116
	0.051	0.016156		0.043453	0.063953		-0.00116	-0.03616
	0.030656	0.129406		0.063953	0.108703
	0.129406	0.031406		0.108703	0.064844
	0.031406	0.08925		0.064844	0.078406
	0.08925	-0.01659		0.078406	0.072
	-0.01659	0.049156		0.072	0.128844
	0.049156	0.097438		0.128844	0.134047
	0.097438	0.030594		0.134047	0.0625
	0.030594	-0.017		0.0625	0.069703
	-0.017	0.037594		0.069703	0.093312
	0.037594	0.078656		0.093312	0.099688
	0.078656	0.099		0.143	0.091656
	0.099	-0.022		0.091656	-0.00891
	-0.022	0.066062		-0.00891	0.016703
	0.066062	0.053687		0.016703	0.0265
	0.053687	-0.063		0.0265	0.041
	-0.063	-0.008		0.041	0
	-0.008	0.024563		0	0.10725
	0.024563	0.085688		0.10725	0.074109
	0.085688	-0.051		0.074109	0.019359
	0.252563	0.005313		0.019359	0.128594
	0.005313	0.000938		0.128594	0.014203
	0.000938	0.143594		0.014203	0.03275
	0.143594	0.247844		0.03275	0.093688
	0.247844	0.08125		0.093688	0.069453
	0.08125	0.083		0.069453	0.039063
	0.083	0.033656		0.039063	0.045797
	0.033656	0.131906		0.045797	0.031547
	0.131906	0.1875		0.031547	0.064859
	0.1875	0.041438		0.064859	0.04925
	0.041438	0.168688		0.094547	0.099852
	0.168688	0.135375		0.099852	0.082398
	0.135375	0.170187		0.082398	0.114953
	0.170187	0.278875		0.114953	0.08875
	0.278875	0.057844		0.08875	0.088344
	0.057844	0.04		0.088344	0.099203
	0.04	0.214406		0.099203	0.053297
	0.214406	0.131438		0.053297	0.10225
	0.131438	-0.01775		0.10225	0.060297
				0.060297	0.100453
				0.100453	0.0885
				0.0885	0.13775
				0.13775	0.170156
				0.170156	0.121844
				0.121844	0.07325
				0.07325	0.083953
				0.083953	0.088547
				0.088547	0.047906
				0.047906	0.114047
				-0.12766	0.0555
				0.0555	0.031594
				0.031594	0.0633
				0.0633	0.055844
				0.055844	0.046203
				0.046203	0.020094
				0.020094	0.014656
				0.014656	0.0125
				0.0125	0.008047
				0.008047	0.00725
				0.00725	0.043953
				0.043953	0.087
				0.087	0.050094
				0.050094	0.057
				0.057	-0.03366
				-0.03366	0.053
				0.053	0.054344
				0.054344	0.025703
				0.010344	0.010797
				0.010797	0.026797
				0.026797	0.014047
				0.014047	0.041
				0.041	0.014047
				0.014047	0.038703
				0.038703	0.034594
				0.034594	0.032144
				0.032144	0.016156
				0.016156	0.033813
				0.033813	0.022344
				0.022344	0.046406
				0.046406	0.005844
				0.005844	0.02175
				0.02175	0.034094
				0.034094	0.011937
				0.011937	-0.00459
				-0.00459	0.02725
				0.02725	0.033187
				0.066594	0.053047
				0.053047	0.043344
				0.043344	0.048297
				0.048297	0.061547
				0.061547	0.050344
				0.050344	0.077844
				0.077844	0.070156
				0.070156	0.069797
				0.069797	0.109844
				0.109844	0.102344
				0.102344	0.047797
				0.047797	0.062
				0.062	0.079547
				0.079547	0.0595
				0.0595	0.090953
				0.090953	0.105797
				0.105797	0.03275
				0.03275	0.087547
				0.087547	0.04025

## Sheet: Fig.2F
	Onset Jitter: ln(RMSSD)																		One-way analysis of variance				Bonferroni's Multiple Comparison Test	Mean Diff.	t	Summary	95% CI of diff
	Bio Rep #1	Bio Rep #2	Bio Rep #3	Bio Rep #4	Bio Rep #5	Bio Rep #6	Bio Rep #7	Bio Rep #8	Bio Rep #9	Bio Rep #10	Bio Rep #11	Bio Rep #12	Bio Rep #13		Mean	SE	N		P value	< 0.0001			Pre I vs Inhib	0.8651	4.555	***	0.3791 to 1.351
Excitatory with Pre-I	-2.08143	-2.55345	-2.13105	-2.71003	-2.19069	-2.20269	-2.78713	-2.59367	-2.3303						-2.398	0.08885	9		F	16.86			Pre I vs No Pre I	0.8852	5.417	****	0.4671 to 1.303
Excitatory without Pre-I	-3.08005	-3.13048	-3.70497	-2.77027	-3.60014	-3.46048	-3.9091	-2.87607	-3.32575	-2.85312	-3.37122	-2.86797	-3.72966		-3.283	0.1063	13		R square	0.5646			Inhib vs No Pre I	0.02012	0.1139	ns	-0.4319 to 0.4722
Inhibitory	-3.08684	-3.15487	-3.51026	-4.02095	-2.99928	-2.52935	-3.53874								-3.263	0.1801	7
