# Supplementary material for: Insights into the dynamic control of breathing revealed through cell-type-specific responses to substance P
Source: eLife. 2019 Dec 5;8:e51350. doi: 10.7554/eLife.51350 (PMC6957314; doi:10.7554/eLife.51350)
Supplement: Figure 3—source data 1. [file elife-51350-fig3-data1.xlsx]

## Sheet: Fig.3B
	Excitatory with Pre-I: Inspiratory Burst Spike Frequency (Hz)
	Baseline															substance P
	Bin Center (a.u.)	Bio Rep #1	Bio Rep #2	Bio Rep #3	Bio Rep #4	Bio Rep #5	Bio Rep #6	Bio Rep #7	Bio Rep #8	Bio Rep #9		Mean	SE	N		Bin Center (a.u.)	Bio Rep #1	Bio Rep #2	Bio Rep #3	Bio Rep #4	Bio Rep #5	Bio Rep #6	Bio Rep #7	Bio Rep #8	Bio Rep #9		Mean	SE	N
	-0.5	4.38398	3.90873	8.00619	11.2102	3.61811	6.18076	6.60991	7.91729	7.06946		6.54495	0.802604	9		-0.5	17.6113	8.68464	13.587	20.199	4.99271	11.5473	15.2264	10.8275	8.21308		12.321	1.61041	9
	-0.45	4.55009	4.22619	8.25331	10.7684	3.61811	6.18196	7.3102	7.66169	7.09359		6.62929	0.753513	9		-0.45	18.5988	9.08742	13.4506	21.2436	5.31027	11.7005	15.2742	11.2634	8.36311		12.6991	1.68535	9
	-0.4	5.25505	5.15548	8.95041	11.286	4.18867	6.0674	7.22049	7.61826	7.11857		6.98448	0.724923	9		-0.4	18.8143	9.69125	13.8539	19.7307	5.31027	10.4645	14.6013	11.0379	8.20685		12.4123	1.59263	9
	-0.35	5.25505	5.15548	8.52273	10.0771	4.69734	6.73509	7.23158	7.03101	6.95047		6.85065	0.570859	9		-0.35	19.0987	10.6925	14.9642	17.514	5.31027	8.87597	14.5209	11.513	8.35831		12.3164	1.5127	9
	-0.3	5.88431	6.01555	8.80358	10.6203	4.69734	7.68163	6.60954	6.7167	7.13491		7.12931	0.582624	9		-0.3	19.4514	10.5459	15.5755	17.2713	5.31027	11.5774	14.5472	11.6337	8.55031		12.7181	1.47677	9
	-0.25	6.97378	6.01555	8.80129	10.9868	4.69734	7.27361	6.64283	6.75366	7.12491		7.25219	0.590636	9		-0.25	20.4022	10.4519	15.5416	19.5754	5.31027	12.8516	13.9147	12.9159	8.5138		13.2753	1.62628	9
	-0.2	9.13725	8.02234	10.5232	11.1661	6.02512	7.54976	6.5459	7.05272	7.78096		8.20037	0.583164	9		-0.2	20.1194	10.7427	15.5509	22.9462	5.31027	14.3789	12.8083	12.456	8.56363		13.6529	1.81974	9
	-0.15	11.0668	8.98384	11.7621	13.3832	6.02512	8.50448	7.02308	7.10068	8.0106		9.09555	0.821766	9		-0.15	21.5794	13.0193	15.3836	23.955	5.76583	15.7145	14.0123	11.7848	10.0876		14.5891	1.85314	9
	-0.1	14.3633	14.6312	12.8841	14.8023	7.25916	10.2216	7.71449	7.43192	8.07312		10.8201	1.11122	9		-0.1	23.3128	15.2725	15.8615	25.6934	7.53359	17.4123	12.9328	13.2954	10.9981		15.8125	1.91154	9
	-0.05	16.2803	21.4458	17.4187	19.0581	7.25916	11.8825	7.71449	7.68277	8.07312		12.9794	1.87455	9		-0.05	22.9922	20.4021	18.3563	25.8245	7.53359	18.5106	13.7446	13.9571	10.9981		16.9244	1.95404	9
	0	17.6182	24.6333	18.7289	23.7365	7.25916	17.8022	8.09189	7.68277	8.32126		14.8749	2.36699	9		0	27.2643	25.0786	20.2514	30.8112	7.53359	23.2311	16.7016	13.9571	11.5408		19.5966	2.57889	9
	0.05	29.4456	50.766	19.6945	26.0431	15.0619	26.6174	18.9209	12.4197	12.0856		23.4505	4.00462	9		0.05	32.5487	52.4305	30.8364	41.7063	19.4869	30.8758	24.6644	22.0713	17.9585		30.2865	3.71604	9
	0.1	30.4213	50.6744	18.9379	28.8667	15.0619	27.858	16.2147	11.941	12.0856		23.5624	4.15515	9		0.1	32.7853	54.6739	29.3426	38.8986	19.4869	30.9684	23.0506	20.9002	20.8883		30.1105	3.7669	9
	0.15	38.7494	66.0055	19.7775	37.6337	13.7629	31.4277	17.9819	11.3922	12.1043		27.6483	5.96584	9		0.15	34.5611	66.7633	33.7901	45.981	19.0083	30.335	26.9164	20.4392	24.8299		33.6249	4.96154	9
	0.2	38.4894	64.8078	25.163	37.9151	12.7076	25.7501	17.0526	11.6687	13.7498		27.4782	5.77025	9		0.2	41.5209	63.9778	40.9352	45.5924	15.6973	29.0049	21.1534	21.2203	28.1841		34.1429	5.08217	9
	0.25	39.2652	69.1421	27.2104	44.8742	12.977	24.4643	19.6763	14.5312	15.4919		29.737	6.14989	9		0.25	44.7856	66.0168	32.8097	50.7737	13.292	32.2645	25.4994	18.0333	28.0891		34.6182	5.54615	9
	0.3	39.9507	65.5205	36.8917	44.6111	12.3315	25.6877	20.6329	15.6085	17.5834		30.9798	5.76492	9		0.3	48.4237	66.7932	40.3231	50.9425	13.7556	28.9014	26.0653	19.5421	30.2769		36.1138	5.64203	9
	0.35	43.3492	61.9804	30.6234	46.5229	12.3315	27.0239	20.2139	17.2428	20.0312		31.0355	5.45642	9		0.35	49.9922	62.2423	34.1046	51.4508	13.7556	30.3382	25.5878	22.156	28.0766		35.3005	5.28635	9
	0.4	51.6653	63.1423	30.1069	49.3262	11.6225	30.6841	24.9192	18.3704	22.5965		33.6037	5.74758	9		0.4	50.7322	65.9094	35.8169	58.0448	12.3045	30.2292	19.9499	23.2675	25.5036		35.7509	6.14832	9
	0.45	46.7509	55.119	31.6462	60.3434	13.096	30.8884	24.7371	19.9131	25.9212		34.2684	5.40529	9		0.45	45.7722	60.3128	41.2009	50.7741	13.4829	31.9809	20.5529	24.8883	27.2371		35.1336	5.11971	9
	0.5	45.1824	61.274	30.9636	57.7329	15.3439	31.2222	21.438	20.8659	29.0864		34.7899	5.45943	9		0.5	48.9411	61.3524	39.3513	51.132	12.6904	32.299	24.9447	25.351	28.9917		36.1171	5.12628	9
	0.55	45.1143	56.6997	27.9624	54.7407	13.0803	32.394	23.9378	23.4847	31.621		34.3372	4.94709	9		0.55	44.3496	58.2968	39.1999	48.0684	12.3191	31.9738	26.2042	22.8112	28.5221		34.6384	4.72711	9
	0.6	45.7224	53.1857	28.3783	61.0939	12.1139	32.1122	27.2561	21.5341	31.6458		34.7825	5.21038	9		0.6	46.074	54.6975	31.4399	44.3809	12.3191	28.9279	24.6413	24.5371	27.7174		32.7484	4.38871	9
	0.65	44.5213	49.9243	30.5391	52.1811	10.2999	32.3197	20.615	19.9282	26.5403		31.8743	4.80666	9		0.65	44.6883	52.4035	30.58	38.2162	11.6285	30.2765	23.489	21.9026	27.6082		31.1992	4.12283	9
	0.7	43.6272	42.968	25.7105	51.2092	9.56491	29.2076	20.3748	18.5699	23.2792		29.3901	4.57262	9		0.7	36.62	47.8059	30.0756	38.4676	9.89657	30.6226	21.0064	19.4814	22.8148		28.5323	3.83855	9
	0.75	39.3779	47.0041	25.8999	42.7262	9.88359	28.8194	16.3435	18.81	22.815		27.9644	4.22946	9		0.75	35.1799	43.0835	23.9553	33.8738	9.89657	28.9608	20.3389	21.1336	22.7977		26.58	3.27732	9
	0.8	39.1826	39.9975	26.3649	41.0258	9.60167	29.1191	14.1085	16.3918	20.851		26.2936	3.96812	9		0.8	31.2434	39.7076	21.6926	33.5448	10.324	26.6486	21.1699	19.9441	23.0106		25.254	2.88906	9
	0.85	32.9896	33.6794	20.9095	29.528	9.60167	27.2143	12.3493	16.7979	16.3205		22.1545	3.00043	9		0.85	27.5024	37.2922	21.3515	30.3095	10.3186	24.6414	19.7681	18.3437	17.3822		22.99	2.65592	9
	0.9	27.3549	32.5102	17.1062	31.7805	9.60167	23.2754	12.7184	14.9563	14.6338		20.4375	2.84347	9		0.9	24.9771	30.1536	19.9019	27.533	10.3186	21.9826	15.8415	17.5845	15.878		20.4634	2.10973	9
	0.95	24.4549	25.856	19.2935	21.6283	10.6561	19.8045	13.731	14.7655	14.9308		18.3467	1.71769	9		0.95	21.6463	26.0297	15.9762	26.9828	10.3186	19.6478	19.5118	15.8681	15.4969		19.0531	1.77713	9
	1	23.1646	25.856	3.40292	22.4227	10.6561	20.2219	13.731	15.5897	14.9308		16.664	2.34901	9		1	19.7276	25.5562	17.6843	23.5215	10.3186	19.8657	22.0413	17.7836	15.1055		19.0671	1.52598	9
	1.05	0.371733	0.551969	3.40292	5.35773	1.25195	3.13152	5.14265	5.41179	3.28629		3.10095	0.667633	9		1.05	14.1088	26.6153	17.6843	26.6808	10.3186	19.6978	23.7444	17.7836	4.35381		17.8875	2.48846	9
	1.1	0.371733	0.551969	3.46958	5.35773	1.25195	3.13152	5.14265	5.41179	3.33629		3.11391	0.6683	9		1.1	13.4257	3.25256	7.60965	15.7996	1.98554	4.84079	9.43765	6.92796	4.35381		7.5148	1.55237	9
	1.15	0.371733	0.551969	3.46958	5.35773	1.25195	1.32727	5.14265	5.41179	3.33629		2.91344	0.697088	9		1.15	11.8928	3.25256	7.60965	14.8965	1.98554	3.17766	9.43765	6.92796	4.35381		7.05934	1.45955	9
	1.2	0.371733	0.551969	3.46958	5.49717	1.25195	1.32727	5.14265	5.41179	3.38629		2.93449	0.70444	9		1.2	12.6382	3.25256	7.60965	15.5953	1.98554	3.88597	9.43765	6.92796	4.35381		7.29851	1.5233	9
	1.25	0.371733	0.551969	3.46958	4.74054	1.25195	1.61392	4.98154	4.89937	3.38629		2.80743	0.6289	9		1.25	13.3413	2.46951	7.60965	15.6055	1.98554	2.51027	8.52441	6.92796	4.35381		7.03644	1.62355	9
	1.3	0.371733	0.551969	3.53346	4.61397	1.25195	1.61392	4.98154	4.47649	3.43629		2.75904	0.607149	9		1.3	12.5319	1.97054	7.60965	15.3014	1.98554	1.65016	9.07074	6.62508	4.35381		6.78876	1.62437	9
	1.35	0.371733	0.551969	3.53346	5.68439	1.25195	1.09237	4.95402	4.38275	3.37293		2.79951	0.67282	9		1.35	10.6594	1.49473	6.80469	15.6016	1.98554	2.5065	10.4239	6.50458	4.35381		6.70386	1.58659	9
	1.4	0.371733	0.551969	3.43531	5.24904	1.25195	1.09237	4.52408	4.81809	3.42293		2.74639	0.646264	9		1.4	10.5119	1.49473	7.48263	14.8975	1.98554	1.96395	9.55864	6.70246	3.82004		6.49082	1.53734	9
	1.45	0.371733	0.551969	3.48597	4.7275	1.25195	1.09237	4.71327	4.80319	3.49753		2.72172	0.62974	9		1.45	10.2018	1.11549	7.81417	14.7767	1.98554	1.56987	10.4222	6.93532	3.82004		6.51568	1.58275	9
	1.5	0.371733	0.551969	3.63427	5.22036	1.25195	1.09237	4.66508	5.64396	3.52487		2.88406	0.695673	9		1.5	10.2587	1.11549	7.87954	13.4445	1.98554	1.56987	11.25	7.43055	3.7174		6.51685	1.53254	9

## Sheet: Fig.3C
	Average spike frequency during bursts (Hz)															Paired t test (two-tailed)
		Bio Rep #1	Bio Rep #2	Bio Rep #3	Bio Rep #4	Bio Rep #5	Bio Rep #6	Bio Rep #7	Bio Rep #8	Bio Rep #9		Mean	SE	N		P value	0.0848
	Baseline	38.4389	50.8056	25.6236	42.1103	11.9678	27.8056	18.8476	16.7391	19.9152		28.03	4.357	9		t, df	t=1.967 df=8
	substance P	36.961	50.5769	29.9073	40.8036	12.9018	28.1163	22.6734	20.7163	23.8184		29.61	3.839	9
	Average burst duration (sec)															Paired t test (two-tailed)
		Bio Rep #1	Bio Rep #2	Bio Rep #3	Bio Rep #4	Bio Rep #5	Bio Rep #6	Bio Rep #7	Bio Rep #8	Bio Rep #9		Mean	SE	N		P value	0.357
	Baseline	0.396719	0.338015	0.414507	0.480837	0.272323	0.763379	0.474954	0.590019	0.472423		0.467	0.04794	9		t, df	t=0.9774 df=8
	substance P	0.504928	0.4191	0.394123	0.530828	0.268326	0.764925	0.5532	0.502647	0.449681		0.4875	0.04512	9

## Sheet: Fig.3D
	Excitatory with Pre-I: IBI Spike Frequency (Hz)
	Baseline															substance P
	Bin Center (a.u.)	Bio Rep #1	Bio Rep #2	Bio Rep #3	Bio Rep #4	Bio Rep #5	Bio Rep #6	Bio Rep #7	Bio Rep #8	Bio Rep #9		Mean	SE	N		Bin Center (a.u.)	Bio Rep #1	Bio Rep #2	Bio Rep #3	Bio Rep #4	Bio Rep #5	Bio Rep #6	Bio Rep #7	Bio Rep #8	Bio Rep #9		Mean	SE	N
	0.025	0.645512	1.00401	3.71452	5.06449	0.898264	1.67275	4.59605	4.8704	3.48419		2.88335	0.608241	9		0.025	1.81083	11.8442	8.11008	13.8096	1.22476	2.13848	6.78404	6.70685	4.01143		6.27114	1.4873	9
	0.075	0.645512	1.11102	3.48904	6.98705	0.898264	1.67275	4.76806	5.06379	3.20798		3.09372	0.733863	9		0.075	1.81083	12.7336	8.45126	14.3698	1.22476	2.13848	10.2118	7.40866	4.09173		6.93788	1.63348	9
	0.125	0.645512	1.11102	3.64192	8.2751	0.937159	1.67275	4.77659	6.06297	4.41275		3.50397	0.878884	9		0.125	3.34824	12.4037	8.4848	15.9553	1.12104	1.88359	13.4616	8.45148	6.64999		7.9733	1.75251	9
	0.175	0.651479	1.11102	4.29712	9.26627	0.937159	1.67275	5.13622	5.86382	4.87976		3.75729	0.965994	9		0.175	4.88001	14.6087	10.3037	16.9605	1.23842	1.88359	16.6397	9.50793	8.08539		9.34532	1.98176	9
	0.225	0.839939	1.31318	5.92536	10.1284	0.955856	1.5974	5.51269	7.05391	5.06226		4.26545	1.09048	9		0.225	6.37308	16.1999	11.7808	17.8105	1.69391	1.88359	14.8042	9.79707	7.61369		9.77298	1.96846	9
	0.275	1.11657	1.36544	5.94495	11.4319	0.909296	1.5974	5.2916	8.22128	5.90201		4.64227	1.23034	9		0.275	6.38603	17.5195	11.5992	18.3959	2.19187	1.88359	13.052	10.5074	7.60693		9.9047	1.98855	9
	0.325	1.32038	1.41084	6.34602	9.35978	1.07369	1.5974	5.28675	8.3394	6.07986		4.5349	1.08454	9		0.325	6.3284	17.53	12.4576	18.0234	1.90194	4.69673	14.1962	10.5218	7.90333		10.3955	1.88255	9
	0.375	1.4331	1.5117	6.48621	12.3405	1.33706	2.06575	6.3134	7.20133	5.88408		4.95257	1.23795	9		0.375	6.163	17.4845	11.9862	18.8198	2.43864	4.21393	14.4964	10.3944	8.24119		10.4709	1.91702	9
	0.425	1.53746	1.78923	7.48863	10.4676	1.3456	3.58942	6.28998	7.55974	5.92148		5.10991	1.07165	9		0.425	7.99692	18.0879	12.4022	17.9641	2.0818	6.09124	13.2019	9.93178	7.01896		10.5308	1.79973	9
	0.475	1.78466	3.57635	7.21905	11.1486	1.60837	2.85213	5.48844	7.56644	6.37627		5.29114	1.04859	9		0.475	7.07939	18.3061	11.6052	20.3631	2.03002	7.19806	16.3447	8.64676	7.19066		10.9738	2.04228	9
	0.525	1.8245	2.32046	7.99842	10.4772	1.67759	4.32373	6.09846	7.28838	6.59828		5.40078	1.02267	9		0.525	7.57249	17.1971	12.3059	19.2158	2.45322	11.1056	11.919	10.6944	7.11932		11.0648	1.70121	9
	0.575	1.90125	2.35848	6.48665	10.2564	2.26462	4.00664	5.917	7.44804	6.6989		5.25978	0.942824	9		0.575	6.69027	16.8069	13.5078	20.2479	2.61228	12.1155	18.1414	10.4448	7.94729		12.0571	1.92308	9
	0.625	2.24793	2.27296	6.1621	12.4133	2.46975	3.83595	5.96834	8.36726	6.02702		5.5294	1.11731	9		0.625	7.24974	18.4023	14.6017	22.074	5.65727	16.0717	16.4382	11.7632	8.56683		13.425	1.83289	9
	0.675	2.237	2.25473	6.48716	13.0715	1.74578	3.73534	6.43238	8.06101	5.91608		5.549	1.2034	9		0.675	14.9902	25.5981	24.6005	30.4315	12.8176	26.5277	21.7664	16.6358	15.9231		21.0323	2.04832	9
	0.725	2.02939	2.46165	6.43168	11.3181	1.8349	4.39924	5.79708	8.18652	6.61237		5.45232	1.04856	9
	0.775	2.04177	2.9724	6.927	11.9142	2.4218	4.96906	6.15425	6.82314	5.60642		5.53667	1.0101	9
	0.825	2.24014	2.58442	6.95004	13.1928	2.82101	6.70521	6.79425	7.19629	5.49875		5.9981	1.12643	9
	0.875	3.00142	3.5749	8.24307	11.9417	4.19422	9.96632	6.403	7.72964	6.44381		6.83312	0.99516	9
	0.925	3.73428	5.57487	8.28608	10.2867	4.64537	11.4292	8.87062	7.60269	7.57218		7.55577	0.84758	9
	0.975	8.95274	10.8596	15.146	19.4563	8.61094	18.2592	16.9541	10.5065	10.513		13.2509	1.4026	9

## Sheet: Fig. 3E
	Average spike frequency during the IBI (Hz)															Paired t test (two-tailed)
		Bio Rep #1	Bio Rep #2	Bio Rep #3	Bio Rep #4	Bio Rep #5	Bio Rep #6	Bio Rep #7	Bio Rep #8	Bio Rep #9		Mean	SE	N		P value	0.0089
	Baseline	2.2597	1.73513	6.37836	10.7932	1.89319	3.79897	5.88922	7.18453	5.69392		5.07	0.9911	9		t, df	t=3.431 df=8
	substance P	16.0865	5.6684	11.3536	18.0007	2.14384	5.63877	13.8224	9.5982	7.08052		9.933	1.77	9
	Average pre-inspiratory ramp slope (Hz/sec)															Paired t test (two-tailed)
		Bio Rep #1	Bio Rep #2	Bio Rep #3	Bio Rep #4	Bio Rep #5	Bio Rep #6	Bio Rep #7	Bio Rep #8	Bio Rep #9		Mean	SE	N		P value	0.1134
	Baseline	0.402978	0.594122	1.30187	1.38697	0.707117	8.29616	1.7314	0.485152	0.65108		1.729	0.8352	9		t, df	t=1.777 df=8
	substance P	0.760183	1.94795	2.31061	2.93414	1.53216	19.1941	2.41265	1.23814	1.15172		3.72	1.948	9
	IBI duration (sec)															Paired t test (two-tailed)
		Bio Rep #1	Bio Rep #2	Bio Rep #3	Bio Rep #4	Bio Rep #5	Bio Rep #6	Bio Rep #7	Bio Rep #8	Bio Rep #9		Mean	SE	N		P value	0.0083
	Baseline	6.90518	9.21782	3.71011	8.40819	4.31779	2.51825	2.76281	3.42824	4.36613		5.071	0.8263	9		t, df	t=3.483 df=8
	substance P	4.13569	6.41528	2.98854	3.69591	3.15708	1.94861	2.1822	2.97269	2.97272		3.385	0.4394	9

## Sheet: Fig.3F
	Spike Frequency
	Short IBI			Long IBI
	Bin Center (a.u.)			Bin Center (a.u.)
	0.025	7.74924		0.025	6.02645
	0.075	8.83394		0.075	10.82
	0.125	17.4036		0.125	8.24653
	0.175	13.7168		0.175	17.5973
	0.225	12.8317		0.225	10.9939
	0.275	14.5002		0.275	14.7699
	0.325	23.2465		0.325	19.7831
	0.375	22.9675		0.375	19.6865
				0.425	19.5978
				0.475	18.0659
				0.525	19.2294
				0.575	17.8529
				0.625	19.2356
				0.675	20.4451
				0.725	20.3564
				0.775	20.7454
				0.825	18.3856
				0.875	19.787
				0.925	20.4843
				0.975	22.0914

## Sheet: Fig.3G
	pre-inspiratory slope vs. IBI duration
	Basline			substance P				Baseline	substance P
	normalized IBI	normalized pre-inspiratory ramp slope		normalized IBI	normalized pre-inspiratory ramp slope		Linear Regression: Best-fit values
	0.775703	1.18282		0.286551	10.0247		Slope	-2.395 ± 0.4060	-4.175 ± 0.7582
	1.07361	0.1164		0.403411	4.95483		Y-intercept when X=0.0	3.395 ± 0.4231	5.083 ± 0.5584
	1.00783	2.80199		0.685662	1.40614		X-intercept when Y=0.0	1.417	1.217
	1.01551	0.950936		0.317515	5.63494		1/slope	-0.4175	-0.2395
	0.940729	0.133372		0.653712	3.46257		95% Confidence Intervals
	0.708503	3.06028		0.734756	3.07257		Slope	-3.191 to -1.600	-5.661 to -2.689
	1.40707	1.02757		0.656454	0.921267		Y-intercept when X=0.0	2.566 to 4.225	3.988 to 6.177
	1.36909	-0.09242		0.67319	2.56579		X-intercept when Y=0.0	1.282 to 1.656	1.070 to 1.512
	0.570242	12.8879		0.614991	2.91708		Goodness of Fit
	0.992524	1.65828		0.600183	3.69194		R square	0.1734	0.1514
	1.31137	-0.08557		0.495733	4.03731		Sy.x	1.543	2.002
	0.973345	-8.03032		0.725017	2.56501		Is slope significantly non-zero?
	1.23607	0.43605		0.643683	3.01263		F	34.81	30.33
	1.05906	-0.42959		0.43566	3.5789		DFn, DFd	1.000, 166.0	1.000, 170.0
	0.419947	0.01373		0.888146	0.270212		P value	< 0.0001	< 0.0001
	0.718251	2.03501		0.631201	2.76335
	1.47205	1.12586		0.706525	2.45358
	0.74669	-0.61452		0.798956	1.29374
	1.20239	0.822255		0.428238	3.6686
	0.818099	2.51549		0.67223	1.69503
	1.10193	0.590278		0.673959	1.38555
	0.993409	1.28911		0.590344	3.2236
	1.16649	0.888798		0.531362	2.08532
	0.948868	0.581017		0.694789	0.86949
	1.181	0.211014		0.40977	3.94394
	0.893236	0.664399		0.726663	2.59519
	0.875749	1.6283		0.517042	0.829664
	1.55102	0.360687		0.826782	2.27872
	0.780228	0.722635		0.654615	1.42945
	1.42602	0.352992		0.679702	1.9964
	1.37841	0.441397		0.688354	1.72448
	0.940196	0.409561		1.30371	0.86374
	1.06036	0.790547		0.703549	1.14198
	0.668064	3.33673		0.683581	1.1163
	0.88019	1.03743		0.671322	2.14294
	0.67317	0.648765		0.98715	0.922842
	0.663572	1.53086		0.578268	3.36159
	1.499	-0.08545		0.630138	2.23561
	1.02897	0.743589		0.920963	1.2914
	0.832602	1.15386		0.549091	2.26119
	0.5923	1.58018		1.28929	1.02911
	1.22995	0.545158		0.655278	3.6947
	1.99781	-0.20693		0.794139	1.33332
	1.19804	0.976641		0.521767	3.05419
	1.03449	0.728083		0.778026	3.48673
	0.719882	1.3576		0.960694	1.75452
	0.613501	1.79343		0.665411	1.3375
	0.656677	1.45067		0.530981	-1.07959
	1.4178	0.214621		0.738253	1.01016
	0.606897	3.73059		0.562879	3.14549
	1.00339	0.210101		0.808239	0.442725
	0.654306	0.927914		0.950401	0.44298
	0.962003	1.20491		1.12501	0.493973
	0.605979	0.763547		0.793878	1.96101
	1.23936	0.676764		0.819736	0.655959
	1.10704	1.23473		1.09822	1.05324
	1.04994	0.593824		0.742464	6.35341
	1.08992	-0.00434		0.217035	1.36897
	1.42559	0.202404		0.544967	0.428642
	0.707572	0.626416		0.826701	0.860242
	0.184101	8.55977		0.43749	0.921326
	0.233873	1.5308		0.403483	2.79882
	1.37434	0.121028		0.479733	-0.29001
	1.49703	-0.14681		0.495439	0.852833
	1.46891	0.311038		0.377407	0.112383
	0.934208	0.213777		0.295344	3.40788
	1.36766	0.531489		0.465595	-0.20006
	1.63581	0.241534		0.301202	1.61061
	1.04804	0.200059		0.872846	2.70223
	0.308973	3.72454		0.291434	4.79627
	0.428838	1.1173		0.354981	1.11953
	1.32753	0.221731		0.079721	14.6359
	0.944577	0.007191		0.445124	-0.10852
	0.813232	0.924615		0.342434	0.808109
	1.15986	0.023636		0.350826	1.20486
	0.710049	1.27405		0.769889	0.510923
	0.831342	0.000204		0.76302	1.61789
	0.73944	1.74678		0.615693	0.876205
	0.712795	1.0538		0.703832	1.83471
	1.28087	0.521074		0.708116	3.77723
	0.455846	3.97469		0.429791	5.62304
	0.990353	-0.47046		0.757765	2.02868
	0.627317	3.36392		0.984299	1.28563
	1.077	0.52397		0.560529	8.27498
	0.678377	1.42747		0.894728	0.673105
	1.85347	0.416061		0.521389	-0.3883
	0.969165	0.641649		0.830415	0.168016
	1.19778	0.203013		0.848639	0.265028
	0.873051	0.051164		0.882757	0.835813
	0.805424	1.64422		0.87303	4.52832
	1.85891	0.675355		0.517987	-3.81801
	1.12245	0.253986		0.958244	1.14417
	1.21636	0.699057		0.773833	0.489679
	0.759699	0.95817		0.537167	8.00336
	0.951357	0.361108		0.538122	3.94916
	0.899212	0.371		0.741215	2.03646
	0.913576	1.60653		0.792814	0.594661
	1.04956	0.253124		0.77765	2.06294
	0.920681	0.680236		0.883452	0.7868
	1.10225	1.56056		0.574358	4.60243
	1.55761	-0.14085		0.805347	2.42384
	1.08639	1.11609		0.738014	2.07502
	0.984434	1.2845		0.799738	2.2632
	0.932867	5.5573		0.692397	1.77968
	1.02544	0.219719		0.800756	2.04232
	0.804727	0.373182		0.664823	5.56757
	0.955607	1.11609		0.668571	3.87955
	1.10492	0.588851		0.93036	1.26895
	1.04396	1.20057		0.736103	4.6702
	1.03552	0.91455		0.729799	1.04907
	0.872191	-0.02074		0.710564	2.03028
	1.17158	0.60803		0.816392	1.58958
	1.24072	0.804748		0.821207	2.43461
	0.905904	0.327791		0.787751	1.7134
	0.974442	0.687744		1.00464	1.4016
	0.745871	0.631636		0.713494	4.28781
	0.715733	0.137943		0.624182	-0.35521
	0.911893	1.07355		0.719828	0.607135
	1.22627	0.259581		0.98206	-0.50487
	0.341047	8.25923		0.944282	-0.17728
	1.061	0.391041		0.771451	-0.03707
	1.0376	0.849864		0.551046	3.40949
	0.88676	0.671668		0.766632	-0.62521
	1.0863	0.316649		1.05056	0.015534
	1.19749	-0.01598		0.511503	7.53218
	0.991799	0.327234		1.19403	0.956555
	1.0008	0.661362		0.943173	0.749407
	1.09296	0.947143		0.897455	-0.1787
	1.34204	0.503986		0.674561	4.35243
	1.06978	1.55679		0.784617	1.34318
	1.19433	0.663622		0.802149	0.715875
	0.89778	0.985754		0.86411	1.53282
	1.04145	0.399537		0.436059	1.95719
	0.811949	2.16719		0.775907	0.894621
	0.872562	2.02875		0.933898	0.998649
	1.21183	2.23099		0.765098	1.88067
	1.28535	0.898915		0.979275	1.17314
	1.04169	1.91207		0.81155	6.55185
	0.913967	-0.64053		1.07203	0.573036
	0.767026	2.7858		0.967443	2.01487
	1.19006	-0.35144		0.822106	1.7292
	1.20221	1.04207		0.79414	2.39843
	0.792681	-1.47863		0.80289	5.03103
	0.900649	0.51134		0.94099	3.27905
	0.824006	2.07261		0.84371	2.73879
	0.923128	1.93905		0.580911	5.72877
	1.14885	-0.96228		0.904346	3.01611
	1.1432	1.42743		1.11325	1.0786
	0.837279	1.36776		0.773101	1.6663
	0.851587	-0.04701		0.940716	3.62443
	0.988819	1.09629		0.811988	2.06327
	0.907679	1.63464		0.799609	-0.07042
	0.755553	1.18056		0.818204	3.01347
	0.935625	1.12521		0.648128	0.707792
	1.24573	1.01313		0.646611	2.82232
	0.740444	1.89782		0.61529	2.48932
	0.91839	1.62996		0.70251	1.05271
	1.12807	0.595775		0.694622	1.09084
	1.40844	0.339202		0.653196	2.95367
	0.860323	1.54161		0.632525	2.19415
	0.936777	0.468122		0.796185	1.64515
	0.712659	1.59261		0.689211	0.664033
	0.868997	1.03359		0.736507	2.11529
	0.822045	0.99864		0.648615	-0.28892
	1.59138	0.15639		0.691344	1.23565
	0.946755	1.20369		0.724927	1.12192
	1.39748	1.09943		0.604282	0.16742
	0.983236	0.440341		0.787367	1.37503
				0.753785	0.801622
				0.731612	-0.02024
				0.859743	1.27673
				0.319877	10.2054
