# Supplementary material for: Insights into the dynamic control of breathing revealed through cell-type-specific responses to substance P
Source: eLife. 2019 Dec 5;8:e51350. doi: 10.7554/eLife.51350 (PMC6957314; doi:10.7554/eLife.51350)
Supplement: Figure 4—source data 1. [file elife-51350-fig4-data1.xlsx]

## Sheet: Fig.4B
	Excitatory without Pre-I (recruited to pre-I): Inspiratory Burst Spike Frequency (Hz)
	Baseline														substance P
	Bin Center (a.u.)	Bio Rep #1	Bio Rep #2	Bio Rep #3	Bio Rep #4	Bio Rep #5					Mean	SE	N		Bin Center (a.u.)	Bio Rep #1	Bio Rep #2	Bio Rep #3	Bio Rep #4	Bio Rep #5					Mean	SE	N
	-0.5	0.372956	0.251041	0.13911	0.334754	0.312816					0.282135	0.0408543	5		-0.5	12.2462	12.5002	5.81096	5.93283	5.74782					8.4476	1.6034	5
	-0.45	0.372956	0.251041	0.13911	0.334754	0.312816					0.282135	0.0408543	5		-0.45	14.1186	14.1661	5.60972	6.59976	5.66807					9.23244	2.01215	5
	-0.4	0.372956	0.251041	0.13911	0.334754	0.312816					0.282135	0.0408543	5		-0.4	13.6834	14.7196	6.15254	6.53187	5.75371					9.36823	1.98379	5
	-0.35	0.372956	0.251041	0.13911	0.334754	0.312816					0.282135	0.0408543	5		-0.35	15.7051	15.2228	6.47703	6.37954	5.79747					9.91639	2.26904	5
	-0.3	0.372956	0.251041	0.13911	0.334754	0.312816					0.282135	0.0408543	5		-0.3	15.3692	16.0839	6.97861	6.37954	5.95889					10.154	2.28353	5
	-0.25	0.372956	0.251041	0.13911	0.334754	0.312816					0.282135	0.0408543	5		-0.25	16.8661	15.922	8.04569	7.30241	6.5267					10.9326	2.24749	5
	-0.2	0.372956	0.251041	0.13911	0.334754	0.312816					0.282135	0.0408543	5		-0.2	19.3359	15.4377	13.2669	8.71645	7.20834					12.7931	2.21173	5
	-0.15	0.372956	0.251041	0.13911	0.334754	0.312816					0.282135	0.0408543	5		-0.15	19.9468	15.9134	12.313	8.71645	8.14292					13.0065	2.22664	5
	-0.1	0.372956	0.251041	0.13911	0.334754	0.312816					0.282135	0.0408543	5		-0.1	24.1391	19.4305	12.9251	9.28638	8.37572					14.8313	3.03184	5
	-0.05	0.372956	0.251041	0.13911	0.334754	0.312816					0.282135	0.0408543	5		-0.05	23.3782	19.801	18.2336	9.28638	8.37572					15.815	2.9741	5
	0	0.372956	0.251041	0.13911	0.334754	0.312816					0.282135	0.0408543	5		0	27.0822	21.5579	22.2106	9.28638	8.37572					17.7026	3.74824	5
	0.05	30.9996	20.7605	47.8752	14.3741	21.0645					27.0148	5.85382	5		0.05	43.4995	34.841	45.2685	18.6992	19.4971					32.361	5.69624	5
	0.1	37.4451	18.3983	56.5521	14.3741	20.5041					29.4547	7.83549	5		0.1	49.8179	33.965	44.7677	18.2127	19.4971					33.2521	6.41454	5
	0.15	54.559	17.8227	52.751	14.3741	26.887					33.2788	8.57072	5		0.15	52.9882	37.5424	46.896	17.7312	18.0871					34.649	7.26359	5
	0.2	54.3007	15.2455	49.3645	15.2946	30.8335					33.0078	8.23078	5		0.2	58.2477	38.6381	49.9388	17.8764	21.7157					37.2833	7.81179	5
	0.25	55.0835	15.0305	56.3426	14.066	24.9627					33.0971	9.43004	5		0.25	60.4681	38.1612	54.9598	17.1996	25.5688					39.2715	8.28126	5
	0.3	54.9974	16.2134	63.4447	11.5023	25.0104					34.2336	10.5141	5		0.3	57.1502	40.327	62.8605	16.5353	21.063					39.5872	9.28759	5
	0.35	57.4442	18.3336	63.722	10.5161	22.6274					34.5287	10.8579	5		0.35	54.3957	43.7935	60.3111	17.6615	20.2219					39.2767	8.72275	5
	0.4	53.7921	21.7893	62.0286	10.1319	22.7962					34.1076	10.0538	5		0.4	58.5546	43.5298	61.2835	18.5776	16.7817					39.7454	9.50632	5
	0.45	48.007	21.7141	62.3935	10.1724	20.2891					32.5152	9.7418	5		0.45	54.8856	35.5516	58.8875	18.0729	15.0795					36.4954	9.05132	5
	0.5	50.4241	27.0264	58.7646	10.8604	20.3052					33.4761	9.09199	5		0.5	54.9395	38.7291	52.7841	16.3544	15.3153					35.6245	8.54681	5
	0.55	46.531	18.9673	56.0043	10.59	20.9731					30.6131	8.73949	5		0.55	49.7659	37.4426	57.7047	14.3276	15.2145					34.891	8.82682	5
	0.6	41.3712	21.3731	54.7117	10.4013	20.2257					29.6166	8.04147	5		0.6	46.418	37.3601	59.6278	14.0096	16.6895					34.821	8.71259	5
	0.65	41.5892	18.0039	54.4128	9.52532	19.896					28.6854	8.32725	5		0.65	49.36	35.3464	42.9999	14.153	16.7217					31.7162	7.01821	5
	0.7	36.1694	13.8754	55.788	9.10419	18.6672					26.7209	8.586	5		0.7	43.7361	32.8307	45.8162	14.6217	15.4871					30.4984	6.68101	5
	0.75	31.6993	17.3767	49.6581	9.66515	21.9293					26.0657	6.89176	5		0.75	35.8462	33.5593	46.3425	15.6305	14.4149					29.1587	6.16345	5
	0.8	32.3322	22.1861	45.6348	9.81625	21.8469					26.3633	5.99446	5		0.8	36.071	31.0854	46.3049	16.0582	14.3552					28.7749	6.0643	5
	0.85	24.1629	15.6577	48.0297	10.3935	17.4722					23.1432	6.59971	5		0.85	33.8727	31.3193	46.2759	13.6731	15.7712					28.1824	6.05868	5
	0.9	24.7573	13.9114	40.2143	10.1372	15.4914					20.9023	5.39376	5		0.9	32.1816	28.1678	34.079	13.9057	15.3943					24.7457	4.23714	5
	0.95	21.6835	13.6663	38.2179	10.1372	16.9642					20.1338	4.90532	5		0.95	29.7944	23.1647	38.1764	13.9317	17.6521					24.5438	4.33262	5
	1	22.3952	13.6663	41.899	10.1372	16.1605					20.8516	5.62943	5		1	27.519	21.4842	33.5132	14.7547	17.4943					22.9531	3.40245	5
	1.05	0.849456	0.201315	0.138991	0.254206	0.292583					0.34731	0.128165	5		1.05	24.8179	22.0843	28.2214	14.7547	18.5948					21.6946	2.34816	5
	1.1	0.849456	0.201315	0.138991	0.254206	0.292583					0.34731	0.128165	5		1.1	29.193	22.6814	27.2726	13.2135	18.3495					22.142	2.91917	5
	1.15	0.849456	0.201315	0.138991	0.254206	0.292583					0.34731	0.128165	5		1.15	9.04897	8.34074	1.55925	3.41559	4.3222					5.33735	1.44558	5
	1.2	0.849456	0.201315	0.138991	0.254206	0.292583					0.34731	0.128165	5		1.2	9.04897	8.34074	1.55925	3.41559	4.3222					5.33735	1.44558	5
	1.25	0.849456	0.201315	0.138991	0.254206	0.292583					0.34731	0.128165	5		1.25	8.13329	8.34074	1.55925	3.41559	4.3222					5.15421	1.33543	5
	1.3	0.849456	0.201315	0.138991	0.254206	0.292583					0.34731	0.128165	5		1.3	8.72549	8.34074	1.55925	3.41559	4.3222					5.27265	1.40493	5
	1.35	0.849456	0.201315	0.138991	0.254206	0.292583					0.34731	0.128165	5		1.35	8.10368	7.77282	1.55925	3.41559	4.3222					5.03471	1.26736	5
	1.4	0.849456	0.201315	0.138991	0.254206	0.292583					0.34731	0.128165	5		1.4	7.37935	6.97961	1.55925	3.41559	4.3222					4.7312	1.09607	5
	1.45	0.617039	0.201315	0.138991	0.254206	0.292583					0.300827	0.083164	5		1.45	6.72502	6.74008	1.55925	3.41559	4.01272					4.49053	1.00074	5
	1.5	0.691864	0.201315	0.138991	0.254206	0.292583					0.315792	0.0975001	5		1.5	6.45703	6.81574	1.55925	3.69728	4.01272					4.5084	0.967525	5
	Excitatory without Pre-I (not recruited to pre-I): Inspiratory Burst Spike Frequency (Hz)
	Baseline														substance P
	Bin Center (a.u.)	Bio Rep #1	Bio Rep #2	Bio Rep #3	Bio Rep #4	Bio Rep #5	Bio Rep #6	Bio Rep #7	Bio Rep #8		Mean	SE	N		Bin Center (a.u.)	Bio Rep #1	Bio Rep #2	Bio Rep #3	Bio Rep #4	Bio Rep #5	Bio Rep #6	Bio Rep #7	Bio Rep #8		Mean	SE	N
	-0.5	0.232037	0.384061	0.50931	0.246299	0.50653	0.216547	0.547585	0.151432		0.349225	0.055418	8		-0.5	0.471425	1.0328	0.759005	0.894831	0.78761	0.172068	0.858314	0.245478		0.652691	0.112168	8
	-0.45	0.232037	0.384061	0.50931	0.246299	0.50653	0.216547	0.547585	0.151432		0.349225	0.055418	8		-0.45	0.471425	1.0328	0.759005	0.894831	0.78761	0.172068	0.858314	0.245478		0.652691	0.112168	8
	-0.4	0.232037	0.384061	0.50931	0.246299	0.50653	0.216547	0.547585	0.151432		0.349225	0.055418	8		-0.4	0.883185	1.0328	0.759005	0.894831	0.78761	0.172068	0.858314	0.245478		0.704161	0.112095	8
	-0.35	0.232037	0.384061	0.50931	0.246299	0.50653	0.216547	0.547585	0.151432		0.349225	0.055418	8		-0.35	0.883185	1.0328	0.759005	0.894831	0.78761	0.172068	0.858314	0.245478		0.704161	0.112095	8
	-0.3	0.232037	0.384061	0.50931	0.246299	0.50653	0.216547	0.547585	0.151432		0.349225	0.055418	8		-0.3	1.1597	1.48275	0.759005	0.894831	0.78761	0.172068	0.858314	0.245478		0.794969	0.153026	8
	-0.25	0.232037	0.384061	0.97867	0.246299	0.50653	0.216547	0.547585	0.151432		0.407895	0.0958999	8		-0.25	1.51691	1.81135	0.759005	0.894831	1.1146	0.172068	0.858314	0.245478		0.921568	0.199705	8
	-0.2	0.232037	0.384061	0.97867	0.246299	0.50653	0.216547	0.547585	0.151432		0.407895	0.0958999	8		-0.2	1.51691	2.00908	0.759005	0.894831	1.1146	0.172068	0.858314	0.245478		0.946285	0.216279	8
	-0.15	0.232037	0.384061	0.97867	0.246299	0.50653	0.216547	0.547585	0.151432		0.407895	0.0958999	8		-0.15	1.51691	2.00908	0.759005	0.894831	1.1146	0.172068	0.858314	0.245478		0.946285	0.216279	8
	-0.1	0.232037	0.384061	0.97867	0.246299	0.50653	0.216547	0.547585	0.151432		0.407895	0.0958999	8		-0.1	2.21039	2.00908	0.759005	0.894831	1.1146	0.172068	0.858314	0.245478		1.03297	0.261579	8
	-0.05	0.232037	0.384061	0.97867	0.246299	0.50653	0.216547	0.547585	0.151432		0.407895	0.0958999	8		-0.05	2.21039	2.00908	0.759005	0.894831	1.1146	0.172068	0.858314	0.245478		1.03297	0.261579	8
	0	0.232037	0.384061	0.97867	1.98923	0.50653	30.7134	0.547585	0.151432		4.43787	3.75939	8		0	2.21039	2.00908	0.759005	0.894831	1.1146	20.8103	0.858314	0.245478		3.61275	2.46762	8
	0.05	39.4538	57.9558	24.6384	51.7172	27.8402	68.2795	15.8095	34.5448		40.0299	6.35062	8		0.05	34.832	25.7998	20.8017	37.9011	22.4331	65.4187	17.3187	46.8811		33.9233	5.70466	8
	0.1	55.2757	69.8815	22.9307	38.582	31.4691	62.0903	15.8095	49.7775		43.227	6.78476	8		0.1	42.5205	27.5618	20.7212	36.9673	25.055	56.3034	17.3187	67.4685		36.7396	6.28916	8
	0.15	59.6726	75.8883	20.367	34.5939	36.7658	47.8343	15.8095	64.1601		44.3864	7.53144	8		0.15	57.1498	44.8178	21.7426	37.3321	30.2906	38.3068	15.3148	81.1455		40.7625	7.38311	8
	0.2	59.3712	65.6648	23.9138	26.6835	39.4524	49.6406	16.4358	73.2022		44.2955	7.40813	8		0.2	57.8976	53.6783	25.0532	40.7482	32.8452	35.2062	15.3679	81.134		42.7413	7.37296	8
	0.25	58.519	57.073	20.5419	33.1543	40.0069	46.656	13.8397	74.5177		43.0386	7.20391	8		0.25	65.3239	52.3542	27.058	45.8541	37.0832	36.8281	14.9271	80.9826		45.0514	7.46223	8
	0.3	56.9294	54.9289	25.7697	44.0709	38.7797	49.4171	14.4226	77.7662		45.2606	6.91507	8		0.3	62.5935	55.0893	23.772	47.8487	39.2337	36.1701	14.0107	72.8611		43.9474	6.95522	8
	0.35	56.2761	51.4442	25.6968	50.4734	36.3076	49.0279	14.4226	74.5751		44.778	6.64441	8		0.35	61.0403	49.7478	24.7422	50.2033	38.6216	36.8971	15.0915	76.4068		44.0938	6.94103	8
	0.4	55.66	47.3345	32.9285	50.8109	39.111	45.6524	14.6968	76.1486		45.2928	6.2984	8		0.4	59.0716	49.243	36.2711	53.7431	42.5269	37.8036	14.9528	67.2704		45.1103	5.70911	8
	0.45	51.5048	44.6656	23.0689	52.0299	37.3957	46.2644	16.0283	68.1671		42.3906	5.90678	8		0.45	59.3843	41.6102	26.7683	52.146	41.6881	36.2159	17.6272	67.3401		42.8475	5.82677	8
	0.5	51.7496	40.7306	22.0672	51.2859	34.4646	44.4076	16.0224	71.1469		41.4844	6.21784	8		0.5	56.4649	39.9015	24.4795	47.8792	45.7231	37.5976	15.844	54.4577		40.2934	5.00793	8
	0.55	53.3858	40.0408	19.6449	51.6114	30.834	45.6838	15.4397	60.4139		39.6318	5.76862	8		0.55	57.0972	40.4103	27.1395	47.0086	48.667	33.2956	18.256	58.5569		41.3039	5.05439	8
	0.6	53.08	38.8675	21.2844	51.2128	34.0183	42.7657	17.3919	63.8362		40.3071	5.62256	8		0.6	56.1668	35.7713	29.9365	42.5363	41.6017	31.5607	15.8449	61.9835		39.4252	5.21817	8
	0.65	52.0127	35.1284	18.2782	42.4544	33.8035	43.7204	17.4551	60.7563		37.9511	5.35132	8		0.65	57.4279	31.4014	21.9908	39.4804	41.5686	32.5772	16.9578	49.4676		36.359	4.77035	8
	0.7	49.4304	31.5526	19.4078	46.9177	38.8128	40.8234	15.7688	55.3816		37.2619	4.9965	8		0.7	56.2612	28.9834	22.4967	37.4541	43.6282	33.4903	15.9414	50.3666		36.0778	4.85023	8
	0.75	45.6964	30.2121	23.8875	43.4616	31.2167	37.8118	14.1506	52.4525		34.8612	4.41947	8		0.75	51.9427	30.8326	18.3193	34.9107	40.3787	31.8896	15.6712	47.3648		33.9137	4.50858	8
	0.8	40.1478	27.7137	18.8868	39.9615	36.0795	41.3528	15.0597	56.717		34.4898	4.76694	8		0.8	49.2138	30.673	14.659	32.6004	38.52	29.7458	14.8892	46.7275		32.1286	4.544	8
	0.85	39.5893	26.8793	17.7706	38.3217	33.3859	40.1974	15.918	46.221		32.2854	3.90876	8		0.85	44.2984	28.128	16.1177	27.0503	33.1414	29.5959	14.6769	53.6102		30.8273	4.64098	8
	0.9	36.005	22.7852	12.5207	34.3024	28.7979	34.6586	16.6006	43.6915		28.6702	3.75156	8		0.9	43.5564	23.9323	16.6129	22.8008	33.1242	28.6825	14.6769	42.3132		28.2124	3.83588	8
	0.95	29.6242	24.2124	15.091	29.9561	23.3526	33.4639	18.532	28.2286		25.3076	2.19825	8		0.95	31.1112	23.3338	17.3031	22.8357	25.1439	24.2504	14.6769	30.6786		23.6667	2.02319	8
	1	30.7753	24.2124	17.2233	31.1191	24.3303	27.8372	16.2126	32.5853		25.537	2.2073	8		1	34.062	20.5551	17.3031	21.2968	29.7515	26.8132	13.6498	31.4139		24.3557	2.56118	8
	1.05	0.271517	0.09663	0.45598	0.20961	1.79855	0.184438	0.530569	0.154876		0.462772	0.198024	8		1.05	4.07524	0.552766	0.737539	0.279386	1.45019	0.213327	0.869823	0.238759		1.05213	0.455943	8
	1.1	0.271517	0.09663	0.45598	0.20961	0.838518	0.184438	0.530569	0.154876		0.342767	0.0884002	8		1.1	3.03169	0.552766	0.737539	0.279386	1.45019	0.213327	0.869823	0.238759		0.921684	0.335006	8
	1.15	0.271517	0.09663	0.45598	0.20961	0.838518	0.184438	0.530569	0.154876		0.342767	0.0884002	8		1.15	0.922285	0.552766	0.737539	0.279386	1.45019	0.213327	0.869823	0.238759		0.658009	0.15098	8
	1.2	0.271517	0.09663	0.45598	0.20961	0.838518	0.184438	0.530569	0.154876		0.342767	0.0884002	8		1.2	0.296588	0.552766	0.737539	0.279386	0.725027	0.213327	0.869823	0.238759		0.489152	0.0931731	8
	1.25	0.271517	0.09663	0.45598	0.20961	0.838518	0.184438	0.530569	0.154876		0.342767	0.0884002	8		1.25	0.296588	0.552766	0.737539	0.279386	0.725027	0.213327	0.869823	0.238759		0.489152	0.0931731	8
	1.3	0.271517	0.09663	0.45598	0.20961	0.838518	0.184438	0.530569	0.154876		0.342767	0.0884002	8		1.3	0.296588	0.552766	0.737539	0.279386	0.725027	0.213327	0.869823	0.238759		0.489152	0.0931731	8
	1.35	0.271517	0.09663	0.45598	0.20961	0.503324	0.184438	0.530569	0.154876		0.300868	0.0602944	8		1.35	0.296588	0.552766	0.737539	0.279386	0.725027	0.213327	0.869823	0.238759		0.489152	0.0931731	8
	1.4	0.271517	0.09663	0.45598	0.20961	0.503324	0.184438	0.530569	0.154876		0.300868	0.0602944	8		1.4	0.296588	0.552766	0.737539	0.279386	0.725027	0.213327	0.869823	0.238759		0.489152	0.0931731	8
	1.45	0.271517	0.09663	0.45598	0.20961	0.503324	0.184438	0.530569	0.154876		0.300868	0.0602944	8		1.45	0.296588	0.552766	0.737539	0.279386	0.725027	0.213327	0.869823	0.238759		0.489152	0.0931731	8
	1.5	0.271517	0.09663	0.45598	0.20961	0.503324	0.184438	0.530569	0.154876		0.300868	0.0602944	8		1.5	0.296588	0.214675	0.430544	0.279386	0.725027	0.213327	0.869823	0.238759		0.408516	0.089359	8

## Sheet: Fig.4C
	Excitatory without Pre-I (recruited to pre-I)
	Average spike frequency during bursts (Hz)														Paired t test (two-tailed)
		Bio Rep #1	Bio Rep #2	Bio Rep #3	Bio Rep #4	Bio Rep #5					Mean	SE	N		P value	0.4652
	Baseline	40.9872	18.0509	52.8905	11.2787	21.2453					28.89	7.773	5		t, df	t=0.8064 df=4
	substance P	44.7056	33.7093	47.4678	15.907	17.6803					31.89	6.586	5
	Average burst duration (sec)														Paired t test (two-tailed)
		Bio Rep #1	Bio Rep #2	Bio Rep #3	Bio Rep #4	Bio Rep #5					Mean	SE	N		P value	0.0696
	Baseline	0.485096	0.371445	0.422651	0.315939	0.400133					0.3991	0.02796	5		t, df	t=2.461 df=4
	substance P	0.580461	0.417253	0.421303	0.370009	0.413772					0.4406	0.03618	5
	Excitatory without Pre-I (not recruited to pre-I)
	Average spike frequency during bursts (Hz)														Paired t test (two-tailed)
		Bio Rep #1	Bio Rep #2	Bio Rep #3	Bio Rep #4	Bio Rep #5	Bio Rep #6	Bio Rep #7	Bio Rep #8		Mean	SE	N		P value	0.3834
	Baseline	48.708	43.3586	21.2959	42.3538	33.8112	44.8793	15.7913	58.2145		38.55	5.01	8		t, df	t=0.9298 df=7
	substance P	51.8708	36.6912	22.6644	38.9299	36.5513	35.9324	15.6507	58.4215		37.09	4.903	8
	Average burst duration (sec)														Paired t test (two-tailed)
		Bio Rep #1	Bio Rep #2	Bio Rep #3	Bio Rep #4	Bio Rep #5	Bio Rep #6	Bio Rep #7	Bio Rep #8		Mean	SE	N		P value	0.9376
	Baseline	0.387315	0.278891	0.385511	0.513812	0.549789	0.697745	0.242048	0.389537		0.4306	0.05289	8		t, df	t=0.08111 df=7
	substance P	0.459106	0.396922	0.336653	0.397092	0.540586	0.710581	0.250009	0.336761		0.4285	0.05067	8

## Sheet: Fig.4D
	Excitatory without Pre-I (recruited to pre-I): IBI Spike Frequency (Hz)
	Baseline											substance P
	Bin Center (a.u.)	Bio Rep #1	Bio Rep #2	Bio Rep #3	Bio Rep #4	Bio Rep #5		Mean	SE	N		Bin Center (a.u.)	Bio Rep #1	Bio Rep #2	Bio Rep #3	Bio Rep #4	Bio Rep #5		Mean	SE	N
	0.025	0.372966	0.242016	0.138991	0.258235	0.292583		0.260958	0.0379395	5		0.025	8.0033	7.13316	1.26012	1.94848	3.3067		4.33035	1.36919	5
	0.075	0.372966	0.242016	0.138991	0.258235	0.292583		0.260958	0.0379395	5		0.075	7.04853	7.84628	1.26012	2.23238	3.57455		4.39237	1.30633	5
	0.125	0.372966	0.242016	0.138991	0.258235	0.292583		0.260958	0.0379395	5		0.125	8.55388	8.42809	1.26012	2.52636	3.85859		4.92541	1.51265	5
	0.175	0.372966	0.242016	0.138991	0.258235	0.292583		0.260958	0.0379395	5		0.175	5.0691	9.35205	1.99667	3.57818	4.68362		4.93592	1.2261	5
	0.225	0.372966	0.242016	0.138991	0.258235	0.292583		0.260958	0.0379395	5		0.225	6.97617	10.2907	2.89752	5.14411	4.89626		6.04094	1.24359	5
	0.275	0.372966	0.242016	0.138991	0.258235	0.292583		0.260958	0.0379395	5		0.275	8.7248	9.62336	3.37532	4.79092	4.41603		6.18609	1.2498	5
	0.325	0.372966	0.242016	0.138991	0.258235	0.292583		0.260958	0.0379395	5		0.325	8.78216	10.5514	4.74276	4.34932	4.48571		6.58228	1.2915	5
	0.375	0.372966	0.242016	0.138991	0.258235	0.292583		0.260958	0.0379395	5		0.375	11.3286	9.53162	5.55641	3.04483	6.36369		7.16504	1.46871	5
	0.425	0.372966	0.575065	0.138991	0.258235	0.292583		0.327568	0.0724251	5		0.425	13.1174	11.0193	4.97506	4.54174	5.94046		7.91879	1.74101	5
	0.475	0.372966	0.23355	0.138991	0.253993	0.292583		0.258417	0.0382029	5		0.475	15.05	10.5225	5.26408	3.8834	5.36913		8.01783	2.09066	5
	0.525	0.372966	0.23355	0.138991	0.253993	0.292583		0.258417	0.0382029	5		0.525	16.8441	10.2792	7.84947	4.75678	6.92638		9.3312	2.07662	5
	0.575	0.372966	0.235013	0.138991	0.265973	0.29353		0.261295	0.0381971	5		0.575	18.9951	13.9223	9.88309	5.0624	7.72747		11.1181	2.44544	5
	0.625	0.372966	0.235013	0.138991	0.265973	0.29353		0.261295	0.0381971	5
	0.675	0.372966	0.38902	0.138991	0.283575	0.29353		0.295616	0.0443779	5
	0.725	0.372966	0.38902	0.138991	0.307046	0.29353		0.300311	0.0443077	5
	0.775	0.372966	0.252778	0.138991	0.307046	0.29353		0.273062	0.0386918	5
	0.825	0.372966	0.252778	0.138991	0.307046	0.29353		0.273062	0.0386918	5
	0.875	0.372966	0.252778	0.138991	0.323132	0.29353		0.276279	0.0395231	5
	0.925	0.372966	0.252778	0.138991	0.323132	0.29353		0.276279	0.0395231	5
	0.975	0.372966	0.252778	0.556803	0.323132	0.29353		0.359842	0.0529969	5

## Sheet: Fig. 4E
	Excitatory without Pre-I (recruited to pre-I)
	Average spike frequency during the IBI (Hz)														Paired t test (two-tailed)
		Bio Rep #1	Bio Rep #2	Bio Rep #3	Bio Rep #4	Bio Rep #5					Mean	SE	N		P value	0.0097
	Baseline	0.372966	0.276223	0.160981	0.27789	0.304251					0.2785	0.03421	5		t, df	t=4.650 df=4
	substance P	10.3191	9.53446	4.1934	3.82158	5.12905					6.6	1.381	5
	Average pre-inspiratory ramp slope (Hz/sec)														Paired t test (two-tailed)
		Bio Rep #1	Bio Rep #2	Bio Rep #3	Bio Rep #4	Bio Rep #5					Mean	SE	N		P value	0.0743
	Baseline	0	0	0	0	0					0	0	5		t, df	t=2.401 df=4
	substance P	9.98096	1.6584	5.40452	0.529808	2.69032					4.053	1.688	5
	IBI duration (sec)														Paired t test (two-tailed)
		Bio Rep #1	Bio Rep #2	Bio Rep #3	Bio Rep #4	Bio Rep #5					Mean	SE	N		P value	0.0587
	Baseline	2.89571	5.20433	7.57748	5.01627	3.85408					4.91	0.7869	5		t, df	t=2.621 df=4
	substance P	1.78015	3.83531	2.57834	4.23159	2.09454					2.904	0.4824	5
	Excitatory without Pre-I (not recruited to pre-I)
	Average spike frequency during the IBI (Hz)														Paired t test (two-tailed)
		Bio Rep #1	Bio Rep #2	Bio Rep #3	Bio Rep #4	Bio Rep #5	Bio Rep #6	Bio Rep #7	Bio Rep #8		Mean	SE	N		P value
	Baseline	no spikes during IBI											8		t, df
	substance P												8
	Average pre-inspiratory ramp slope (Hz/sec)														Paired t test (two-tailed)
		Bio Rep #1	Bio Rep #2	Bio Rep #3	Bio Rep #4	Bio Rep #5	Bio Rep #6	Bio Rep #7	Bio Rep #8		Mean	SE	N		P value
	Baseline	no spikes during IBI											8		t, df
	substance P												8
	IBI duration (sec)														Paired t test (two-tailed)
		Bio Rep #1	Bio Rep #2	Bio Rep #3	Bio Rep #4	Bio Rep #5	Bio Rep #6	Bio Rep #7	Bio Rep #8		Mean	SE	N		P value	0.0082
	Baseline	4.57588	11.2968	3.07184	4.82567	2.08349	6.31876	2.62874	7.06444		5.233	1.063	8		t, df	t=3.652 df=7
	substance P	3.52086	8.75399	2.50612	3.77042	1.91009	5.98305	1.38288	4.46223		4.036	0.8501	8

## Sheet: Fig.4F
	pre-inspiratory slope vs. IBI duration
	substance P				substance P
	normalized IBI	normalized pre-inspiratory ramp slope		Linear Regression: Best-fit values
	0.499695	3.33416		Slope	-2.036 ± 0.4332
	0.487512	-0.23589		Y-intercept when X=0.0	3.164 ± 0.4515
	1.00209	0.652419		X-intercept when Y=0.0	1.554
	0.742739	2.65072		1/slope	-0.4911
	1.69245	0.294054		95% Confidence Intervals
	0.880263	1.83131		Slope	-2.898 to -1.175
	1.00652	1.54578		Y-intercept when X=0.0	2.266 to 4.062
	0.969546	1.26978		X-intercept when Y=0.0	1.358 to 1.991
	1.11641	1.05152		Goodness of Fit
	0.923588	0.278045		R square	0.1871
	0.983063	1.18068		Sy.x	1.259
	0.795263	0.688862		Is slope significantly non-zero?
	1.22374	0.868026		F	22.09
	1.06919	0.585553		DFn, DFd	1.000, 96.00
	1.04134	1.14915		P value	< 0.0001
	1.74325	0.306811
	0.894974	-0.12991
	0.976568	1.09348
	0.926994	0.762632
	1.02481	0.822823
	0.788316	0.213721
	0.804644	1.28833
	0.672501	1.74551
	0.471311	1.73822
	1.05612	0.91659
	0.992928	0.603865
	1.2506	0.865052
	1.70946	1.04635
	1.02774	1.20438
	1.11632	1.57803
	0.419571	4.92854
	0.617926	1.22669
	0.999495	1.05798
	1.14176	2.4426
	1.29256	1.09577
	1.61436	0.427716
	1.11844	1.66917
	0.706152	5.04032
	1.1998	2.42072
	1.21117	0.813321
	1.12851	0.726464
	0.767488	1.40601
	0.536137	3.1213
	1.05338	1.95036
	1.11288	0.235468
	0.81289	1.27695
	1.30039	0.162593
	0.748665	0.254828
	0.981155	0.916446
	1.09355	0.391433
	1.05717	0.463735
	1.01897	0.887862
	0.741757	3.5817
	1.35174	0.728753
	0.469355	-0.2279
	1.13806	1.05551
	1.40937	0.560359
	1.06735	0.69482
	0.5581	6.14197
	0.575851	2.84265
	0.719238	0.913218
	1.03927	0.699558
	0.70754	1.7428
	0.743281	1.14799
	1.24533	-1.64697
	0.963034	0.047576
	0.893718	4.16175
	0.742156	0.111198
	1.35928	0.125374
	1.30094	0.039246
	0.592065	2.65707
	1.49198	-0.42586
	0.832846	-0.76122
	1.21687	-0.28061
	1.42538	0.257698
	1.24369	-0.30738
	1.15103	-0.33993
	1.19839	2.87386
	1.02458	0.244788
	1.3528	0.455887
	1.09137	0.153495
	0.59247	6.47617
	0.459249	0.951584
	0.689314	1.11864
	0.975898	-0.07163
	1.31658	0.362555
	1.09359	0.265272
	1.05826	-0.11279
	0.779577	-0.02948
	1.02333	0.397991
	0.872686	0.55721
	0.919892	4.03772
	1.09677	0.063888
	1.00738	0.236488
	0.823216	0.426915
	0.748397	2.69181
	1.46359	1.38079
	1.61103	0.392694
