# Supplementary material for: Insights into the dynamic control of breathing revealed through cell-type-specific responses to substance P
Source: eLife. 2019 Dec 5;8:e51350. doi: 10.7554/eLife.51350 (PMC6957314; doi:10.7554/eLife.51350)
Supplement: Figure 5—source data 1. [file elife-51350-fig5-data1.xlsx]

## Sheet: Fig.5B
	Inhibitory Neurons: Inspiratory Burst Spike Frequency (Hz)
	Baseline													substance P
	Bin Center (a.u.)	Bio Rep #1	Bio Rep #2	Bio Rep #3	Bio Rep #4	Bio Rep #5	Bio Rep #6	Bio Rep #7		Mean	SE	N		Bin Center (a.u.)	Bio Rep #1	Bio Rep #2	Bio Rep #3	Bio Rep #4	Bio Rep #5	Bio Rep #6	Bio Rep #7		Mean	SE	N
	-0.5	0.529583	0.305338	0.184815	1.65769	0.248743	0.375329	0.20112		0.500374	0.197988	7		-0.5	0.447417	0.440956	0.16322	0.158668	1.34333	0.375329	0.306522		0.462206	0.153558	7
	-0.45	0.529583	0.305338	0.184815	1.65769	0.248743	0.375329	0.20112		0.500374	0.197988	7		-0.45	0.447417	0.440956	0.16322	0.158668	1.34333	0.375329	0.306522		0.462206	0.153558	7
	-0.4	0.529583	0.305338	0.184815	1.65769	0.248743	0.375329	0.20112		0.500374	0.197988	7		-0.4	0.447417	0.440956	0.16322	0.158668	1.34333	0.375329	0.306522		0.462206	0.153558	7
	-0.35	0.529583	0.305338	0.184815	1.65769	0.248743	0.375329	0.20112		0.500374	0.197988	7		-0.35	0.447417	0.440956	0.16322	0.158668	1.34333	0.375329	0.306522		0.462206	0.153558	7
	-0.3	0.529583	0.305338	0.184815	1.65769	0.248743	0.375329	0.20112		0.500374	0.197988	7		-0.3	0.447417	0.440956	0.16322	0.158668	1.34333	0.375329	0.306522		0.462206	0.153558	7
	-0.25	0.529583	0.305338	0.184815	1.65769	0.248743	0.375329	0.20112		0.500374	0.197988	7		-0.25	0.447417	0.440956	0.16322	0.158668	1.34333	0.375329	0.306522		0.462206	0.153558	7
	-0.2	0.529583	0.305338	0.184815	1.65769	0.248743	0.375329	0.20112		0.500374	0.197988	7		-0.2	0.447417	0.440956	0.16322	0.158668	1.34333	0.375329	0.306522		0.462206	0.153558	7
	-0.15	0.529583	0.305338	0.184815	1.65769	0.248743	0.375329	0.20112		0.500374	0.197988	7		-0.15	0.447417	0.440956	0.16322	0.158668	1.34333	0.375329	0.306522		0.462206	0.153558	7
	-0.1	0.529583	0.305338	0.184815	1.65769	0.248743	0.375329	0.20112		0.500374	0.197988	7		-0.1	0.447417	0.440956	0.16322	0.158668	1.34333	0.375329	0.306522		0.462206	0.153558	7
	-0.05	0.529583	0.305338	0.184815	1.65769	0.248743	0.375329	0.20112		0.500374	0.197988	7		-0.05	0.447417	0.440956	0.16322	0.158668	1.34333	0.375329	0.306522		0.462206	0.153558	7
	0	0.529583	0.305338	0.184815	1.65769	0.248743	0.375329	0.20112		0.500374	0.197988	7		0	0.447417	0.440956	0.16322	0.158668	1.34333	0.375329	0.306522		0.462206	0.153558	7
	0.05	42.5214	37.8417	62.7642	61.7434	37.9892	18.0065	69.7782		47.2349	6.91803	7		0.05	34.5774	33.7238	59.0043	62.5128	30.9697	18.0065	46.9059		40.8143	6.06532	7
	0.1	54.5468	52.0736	60.809	59.7623	40.1933	18.0065	71.8588		51.0358	6.59575	7		0.1	33.1929	33.5088	58.9864	60.5822	38.6385	18.0065	47.8522		41.5382	5.7802	7
	0.15	83.5137	49.0919	59.5416	59.6455	55.9365	17.5982	67.5672		56.1278	7.62038	7		0.15	47.6958	49.1356	58.8314	58.4631	54.07	17.5982	53.7467		48.5058	5.39074	7
	0.2	86.0697	49.8656	59.0442	59.1277	62.8203	16.1371	66.1144		57.0256	8.00501	7		0.2	54.2186	43.4149	60.4307	59.2116	90.1303	16.1371	56.4678		54.2873	8.34539	7
	0.25	94.5582	60.8442	54.2621	54.0334	83.4793	15.1783	60.3165		60.3817	9.54045	7		0.25	61.6662	41.4234	57.7242	59.3628	105.707	15.1783	52.8832		56.2779	10.2414	7
	0.3	103.904	51.4054	49.0412	47.9934	95.6798	15.7156	57.9453		60.2407	11.4472	7		0.3	67.0255	44.0195	51.952	53.503	112.321	15.7156	50.4954		56.4332	11.032	7
	0.35	100.807	53.6502	43.5244	42.5837	98.6239	17.008	55.8059		58.8576	11.5768	7		0.35	63.4166	53.4072	47.4072	48.7425	116.849	17.008	46.6315		56.2089	11.4421	7
	0.4	100.453	43.2744	40.9241	40.5928	114.735	17.7049	56.2348		59.1312	13.3188	7		0.4	66.5457	43.2372	45.3422	45.6023	114.046	17.7049	47.6423		54.303	11.3193	7
	0.45	85.3367	38.1738	37.9267	38.4402	113.012	18.2731	59.0875		55.75	12.4367	7		0.45	64.9439	40.0127	39.793	40.4033	103.094	18.2731	40.8812		49.6287	10.2667	7
	0.5	105.83	39.0195	37.9374	38.398	110.394	17.5509	53.8138		57.5634	13.6558	7		0.5	61.5677	35.6116	39.2902	39.8125	91.4935	17.5509	40.6216		46.564	8.91666	7
	0.55	87.3484	42.1383	35.6238	35.3693	99.4156	19.5046	49.387		52.6839	11.1262	7		0.55	56.3316	36.1208	37.4583	38.3218	92.4537	19.5046	39.1813		45.6246	8.78543	7
	0.6	80.9926	31.1657	33.5919	32.6885	105.027	18.0605	48.122		49.9498	11.8882	7		0.6	52.966	32.2505	33.2752	31.4513	93.4399	18.0605	38.4436		42.841	9.29614	7
	0.65	77.2881	30.7498	28.5202	29.4316	109.658	19.1911	41.8736		48.1018	12.4869	7		0.65	55.3632	28.4763	28.3907	28.2435	77.8079	19.1911	38.2397		39.3875	7.72248	7
	0.7	73.0806	28.8314	25.2675	26.3005	96.596	16.0447	41.5563		43.9538	11.2268	7		0.7	53.6903	26.769	27.7819	28.3228	79.8703	16.0447	35.9449		38.3463	8.17797	7
	0.75	66.1428	29.6958	24.3481	25.3109	90.5776	16.5599	40.7242		41.9085	10.157	7		0.75	46.1963	24.5108	26.5158	26.2844	87.017	16.5599	35.1462		37.4615	8.97978	7
	0.8	56.7372	27.0965	23.2861	24.3117	92.2846	14.8117	38.8772		39.6293	10.1659	7		0.8	45.3579	26.7638	24.7923	25.5124	77.1205	14.8117	33.2038		35.3661	7.79702	7
	0.85	52.0166	30.179	25.4524	26.9985	75.5854	12.8099	32.4237		36.4951	7.86578	7		0.85	39.8082	26.5859	23.0872	25.1376	77.1378	12.8099	28.1034		33.2386	7.90862	7
	0.9	47.2983	26.2564	28.3501	29.8931	70.5014	13.0892	26.9897		34.6255	7.07379	7		0.9	32.7082	27.6404	23.7225	26.2452	72.7253	13.0892	25.6702		31.6859	7.19901	7
	0.95	37.6683	20.9553	29.914	29.8931	60.045	13.1684	28.0784		31.3889	5.59936	7		0.95	27.58	24.3072	26.392	27.7172	58.7313	13.1684	24.21		28.8723	5.3227	7
	1	39.3878	23.0261	29.914	29.8931	45.8776	13.1684	25.5		29.5382	4.05598	7		1	26.0184	29.1429	26.392	27.7172	54.2176	13.1684	24.614		28.7529	4.6872	7
	1.05	0.344761	0.305585	0.185623	0.188546	0.174439	0.381167	0.203192		0.254759	0.0327098	7		1.05	25.8733	29.4138	21.9076	27.7172	43.8976	0.381167	23.1327		24.6176	4.88647	7
	1.1	0.344761	0.305585	0.185623	0.188546	0.174439	0.381167	0.203192		0.254759	0.0327098	7		1.1	0.656901	1.20922	0.187582	0.157334	1.34895	0.381167	0.310857		0.607429	0.184678	7
	1.15	0.344761	0.305585	0.185623	0.188546	0.174439	0.381167	0.203192		0.254759	0.0327098	7		1.15	0.656901	0.734655	0.187582	0.157334	1.34895	0.381167	0.310857		0.539635	0.158439	7
	1.2	0.344761	0.305585	0.185623	0.188546	0.174439	0.381167	0.203192		0.254759	0.0327098	7		1.2	0.656901	0.734655	0.187582	0.157334	1.34895	0.381167	0.310857		0.539635	0.158439	7
	1.25	0.344761	0.305585	0.185623	0.188546	0.174439	0.381167	0.203192		0.254759	0.0327098	7		1.25	0.656901	0.734655	0.187582	0.157334	1.34895	0.381167	0.310857		0.539635	0.158439	7
	1.3	0.344761	0.305585	0.185623	0.188546	0.174439	0.381167	0.203192		0.254759	0.0327098	7		1.3	0.656901	0.734655	0.187582	0.157334	1.34895	0.381167	0.310857		0.539635	0.158439	7
	1.35	0.344761	0.305585	0.185623	0.188546	0.174439	0.381167	0.203192		0.254759	0.0327098	7		1.35	0.656901	0.492359	0.187582	0.157334	1.34895	0.381167	0.310857		0.505021	0.155083	7
	1.4	0.344761	0.305585	0.185623	0.188546	0.174439	0.381167	0.203192		0.254759	0.0327098	7		1.4	0.656901	0.492359	0.187582	0.157334	1.34895	0.381167	0.310857		0.505021	0.155083	7
	1.45	0.344761	0.305585	0.185623	0.188546	0.174439	0.381167	0.203192		0.254759	0.0327098	7		1.45	0.656901	0.492359	0.187582	0.157334	1.34895	0.381167	0.310857		0.505021	0.155083	7
	1.5	0.344761	0.305585	0.185623	0.188546	0.174439	0.381167	0.203192		0.254759	0.0327098	7		1.5	0.656901	0.492359	0.187582	0.157334	1.34895	0.381167	0.310857		0.505021	0.155083	7

## Sheet: Fig.5C
	Inhibitory Neurons
	Average spike frequency during bursts (Hz)													Paired t test (two-tailed)
		Bio Rep #1	Bio Rep #2	Bio Rep #3	Bio Rep #4	Bio Rep #5	Bio Rep #6	Bio Rep #7		Mean	SE	N		P value	0.2317
	Baseline	73.7751	38.2667	39.5022	39.6205	82.9216	16.3794	49.6027		48.58	8.62	7		t, df	t=1.331 df=6
	substance P	48.4164	35.0031	38.9751	40.6575	79.6066	22.1453	39.5247		43.48	6.727	7
	Average burst duration (sec)													Paired t test (two-tailed)
		Bio Rep #1	Bio Rep #2	Bio Rep #3	Bio Rep #4	Bio Rep #5	Bio Rep #6	Bio Rep #7		Mean	SE	N		P value	0.3377
	Baseline	0.302397	0.425758	0.150891	0.144049	0.517061	0.407356	0.264866		0.3161	0.05355	7		t, df	t=1.042 df=6
	substance P	0.320061	0.385662	0.165758	0.159281	0.575947	0.411391	0.274094		0.3275	0.05553	7
	IBI duration (sec)													Paired t test (two-tailed)
		Bio Rep #1	Bio Rep #2	Bio Rep #3	Bio Rep #4	Bio Rep #5	Bio Rep #6	Bio Rep #7		Mean	SE	N		P value	0.009
	Baseline	3.29662	3.68049	6.75205	6.69141	7.01078	3.55491	5.12146		5.158	0.6276	7		t, df	t=3.798 df=6
	substance P	2.46383	2.91274	6.2243	6.69059	6.51578	2.91339	3.51268		4.462	0.7235	7
