# Supplementary material for: Insights into the dynamic control of breathing revealed through cell-type-specific responses to substance P
Source: eLife. 2019 Dec 5;8:e51350. doi: 10.7554/eLife.51350 (PMC6957314; doi:10.7554/eLife.51350)
Supplement: Figure 6—source data 1. [file elife-51350-fig6-data1.xlsx]

## Sheet: Fig.6A
	Onset Times = Neuron Burst Time - Population Burst Time
	Excitatory with Pre-I					Excitatory without Pre-I: (recruited to pre-I)					Excitatory without Pre-I: (not recruited to pre-I)					Inhibitory
	Baseline		substance P			Baseline		substance P			Baseline		substance P			Baseline		substance P
	(n)	(n+1)	(n)	(n+1)		(n)	(n+1)	(n)	(n+1)		(n)	(n+1)	(n)	(n+1)		(n)	(n+1)	(n)	(n+1)
	0.356	0.2368	0.128	0.112		-0.011	0.005453	0.0025	0.058547		-0.02295	0.007801	0.038563	0.025313		0.069	0.040312	0.106875	0.081875
	0.2368	0.226	0.112	0.017		0.005453	0.005	0.058547	-0.0552		0.007801	0.022602	0.025313	0.009437		0.040312	0.137344	0.081875	0.069687
	0.226	0.173	0.017	-0.022		0.005	0.000852	-0.0552	-0.05555		0.022602	0.009453	0.009437	0.038594		0.137344	0.076813	0.069687	0.112188
	0.173	0.037712	-0.022	0.0247		0.000852	0.016352	-0.05555	0.010406		0.009453	-0.02695	0.038594	0.006594		0.076813	0.056781	0.112188	0.077188
	0.037712	0.127	0.0247	0.045		0.016352	-0.044	0.010406	0.005906		-0.02695	-0.0197	0.006594	0.00225		0.056781	0.058688	0.077188	0.055187
	0.127	0.0655	0.045	0.026		-0.044	0.024	0.005906	0.04675		-0.0197	0.008	0.00225	0.01325		0.058688	0.079813	0.055187	0.066
	0.0655	0.152	0.026	0.114		0.024	0.009148	0.04675	-0.01555		0.008	-0.00345	0.01325	0.048906		0.079813	0.05475	0.066	0.065562
	0.152	0.283	0.114	0.088		0.009148	0.019797	-0.01555	0.063188		-0.00345	0.030852	0.048906	0.016906		0.05475	0.057875	0.065562	0.111562
	0.283	0.1407	0.088	0.13		0.019797	0.030352	0.063188	0.015688		0.030852	0.012305	0.016906	0.08325		0.057875	0.070562	0.111562	0.078375
	0.1407	0.113	0.13	0.134		0.030352	0.021102	0.015688	0.070844		0.012305	0.020602	0.08325	0.024687		0.070562	0.055	0.078375	0.055938
	0.113	0.296	0.134	0.102		0.021102	-0.0142	0.070844	0.054406		0.020602	0.029063	0.024687	0.005063		0.055	0.0565	0.055938	0.082313
	0.296	0.216	0.102	0.185		-0.0142	0.03	0.054406	-0.04031		0.029063	0.001547	0.005063	0.002094		0.0565	0.052031	0.082313	0.06925
	0.216	0.185	0.185	0.041		0.03	0.022703	-0.04031	0.01775		0.001547	0.024344	0.002094	0.031406		0.052031	0.063531	0.06925	0.059563
	0.185	0.22	0.041	0.093		0.022703	0.013352	0.01775	0.046187		0.024344	-0.0143	0.031406	0.012125		0.063531	0.059594	0.059563	0.060812
	0.22	0.2534	0.093	0.104		0.013352	0.028203	0.046187	0.090844		-0.0143	0.007203	0.012125	-0.0095		0.059594	0.056469	0.060812	0.069938
	0.2534	0.082	0.104	0.107		0.028203	0.048547	0.090844	0.02625		0.007203	0.024297	-0.0095	0.011		0.056469	0.061469	0.069938	0.059625
	0.082	0.0965	0.107	0.064		0.048547	0.055703	0.02625	-0.02516		0.024297	0.015203	0.011	0.03175		0.061469	0.066156	0.059625	0.082312
	0.0965	0.2114	0.064	0.142		0.055703	0.032156	-0.02516	0.033406		0.015203	-0.00545	0.03175	-0.01337		0.066156	0.064437	0.082312	0.086875
	0.2114	0.181	0.142	0.004		0.032156	0.015594	0.033406	0.077937		-0.00545	-0.04591	-0.01337	-0.01356		0.064437	0.061312	0.086875	0.054688
	0.112	0.031	0.141	0.005		0.06985	0.04515	0.113594	0.037187		0.060594	0.06375	0.227375	0.015437		0.125344	0.120594	0.1025	0.078125
	0.031	0.067	0.005	0.1186		0.04515	0.056602	0.037187	0.123594		0.06375	0.06575	0.015437	0.092813		0.120594	0.269297	0.078125	0.091575
	0.067	-0.015	0.1186	0.007		0.056602	0.079551	0.123594	0.114187		0.06575	0.12525	0.092813	0.0385		0.269297	0.052547	0.091575	0.061062
	-0.015	0.061	0.007	0.034		0.079551	0.138398	0.114187	0.01325		0.12525	0.2485	0.0385	0.188188		0.052547	0.061547	0.061062	0.016625
	0.061	0.144	0.034	0.06		0.138398	0.067398	0.01325	0.045594		0.2485	0.22625	0.188188	0.092062		0.061547	0.044047	0.016625	0.022688
	0.144	0.115	0.06	0.121		0.067398	0.061898	0.045594	0.083844		0.22625	0.128156	0.092062	-0.04538		0.044047	0.08	0.022688	0.012187
	0.115	0.0585	0.121	-0.012		0.061898	0.058898	0.083844	0.0505		0.128156	0.137844	-0.04538	0.067438		0.08	0.086563	0.012187	0.075938
	0.0585	0.12	-0.012	0.185		0.058898	0.112852	0.0505	0.058938		0.137844	0.136	0.067438	-0.01956		0.086563	0.11125	0.075938	0.03525
	0.12	0.058	0.185	0.01		0.112852	0.009547	0.058938	0.061156		0.136	0.0905	-0.01956	0.022875		0.11125	0.164094	0.03525	0.057625
	0.058	0.092	0.01	0.023		0.009547	0.040547	0.061156	0.025937		0.0905	0.033	0.022875	0.105125		0.164094	0.129156	0.057625	0.06025
	0.092	0.029	0.023	0.0656		0.040547	0.148	0.025937	-0.085		0.033	0.041313	0.105125	0.068688		0.129156	-0.02481	0.06025	0.026375
	0.029	0.115	0.0656	0.09		0.148	0.041953	-0.085	0.046906		0.041313	0.095687	0.068688	0.065875		-0.02481	0.034906	0.026375	0.076063
	0.115	0.137	0.09	0.064		0.041953	-0.01295	0.046906	0.007		0.095687	0.208687	0.065875	0.000688		0.034906	0.063562	0.076063	0.11925
	0.137	0.063	0.064	0.029		-0.01295	0.13075	0.007	0.0095		0.208687	0.143094	0.000688	0.111313		0.063562	0.115656	0.11925	0.034063
	0.063	0.198	0.029	0.026		0.13075	0.114898	0.0095	0.057812		0.143094	0.182406	0.111313	-0.01263		0.115656	0.142344	0.034063	0.048875
	0.198	0.046	0.026	-0.13		0.114898	0.0605	0.057812	0.051063		0.182406	0.112437	-0.01263	0.056875		0.142344	0.051938	0.048875	0.084125
	0.046	-0.013	-0.13	0.163		0.0605	0.065453	0.051063	-0.0145		0.112437	0.12175	0.056875	-0.10956		0.051938	0.043906	0.084125	0.0285
	-0.013	0.0436	0.163	0.1575		0.065453	0.057148	-0.0145	-0.099		0.12175	0.130937	-0.10956	-0.01413		0.043906	0.092	0.0285	0.115812
	0.0436	0.071	0.1575	-0.179		0.057148	0.036	-0.099	-0.049		0.130937	0.114094	-0.01413	0.016125		0.092	0.0355	0.115812	0.064625
	0.137047	0.057547	0.055313	-0.05687		0.02	0.038703	0.043	0.045		0.134844	0.109703	0.073875	0.134187		0.051906	0.019938	-0.005	-0.03994
	0.057547	0.068453	-0.05687	-0.10206		0.038703	0.016	0.045	0.004		0.109703	0.070297	0.134187	0.007875		0.019938	0.034156	-0.03994	-0.04
	0.068453	0.011453	-0.10206	0.06575		0.016	0.020656	0.004	-0.023		0.070297	0.113594	0.007875	0.207375		0.034156	-0.00894	-0.04	0.011125
	0.011453	0.059156	0.06575	-0.01013		0.020656	0.059406	-0.023	-0.052		0.113594	0.13725	0.207375	0.018563		-0.00894	-0.04925	0.011125	-0.00488
	0.059156	-0.0187	-0.01013	-0.08638		0.059406	0.002656	-0.052	0.017		0.13725	0.080156	0.018563	0.116187		-0.04925	0.069687	-0.00488	-0.05363
	-0.0187	-0.06605	-0.08638	0.018125		0.002656	0.0065	0.017	-0.025		0.080156	0.051406	0.116187	0.037875		0.069687	-0.05216	-0.05363	0.006875
	-0.06605	0.083844	0.018125	-0.06363		0.0065	-0.014	-0.025	0.038062		0.051406	0.05375	0.037875	0.220375		-0.05216	0.015094	0.006875	0.01325
	0.083844	-0.00984	-0.06363	0.017188		-0.014	0.014797	0.038062	-0.03		0.05375	0.043453	0.220375	0.150625		0.015094	-9.4e-05	0.01325	-0.01887
	-0.00984	-0.0332	0.017188	-0.07275		0.014797	0.0004	-0.03	-0.04084		0.043453	0.063953	0.150625	0.137187		-9.4e-05	0.010188	-0.01887	-0.02337
	-0.0332	-0.0163	-0.07275	0.118438		0.0004	0.027594	-0.04084	0.029313		0.063953	0.108703	0.137187	0.144813		0.010188	0.030937	-0.02337	-0.00205
	-0.0163	0.01325	0.118438	-0.05662		0.027594	0.02475	0.029313	0.001		0.108703	0.064844	0.144813	0.049938		0.030937	-0.02912	-0.00205	-0.0275
	0.01325	0.05275	-0.05662	-0.06031		0.02475	0.038	0.001	0.024		0.064844	0.078406	0.049938	0.0085		-0.02912	0.00325	-0.0275	-0.00675
	0.05275	0.084344	-0.06031	0.005375		0.038	0.027344	0.024	0.03025		0.078406	0.072	0.0085	0.0135		0.00325	-0.01416	-0.00675	0.003125
	0.084344	-0.01016	0.005375	0.106937		0.027344	0	0.03025	-0.01134		0.072	0.128844	0.0135	0.292625		-0.01416	-0.01925	0.003125	-0.03263
	-0.01016	0.022188	0.106937	0.075312		0	0.035687	-0.01134	0.042344		0.128844	0.134047	0.292625	0.125875		-0.01925	-0.04116	-0.03263	-0.00225
	0.022188	-0.02369	0.075312	0.05625		0.035687	0.020656	0.042344	0.025406		0.134047	0.0625	0.125875	0.023625		-0.04116	-0.01159	-0.00225	0.004375
	-0.02369	0.01575	0.05625	-0.02319		0.020656	0.007188	0.025406	-0.02131		0.0625	0.069703	0.023625	0.057125		-0.01159	0.022844	0.004375	-0.01262
	0.01575	-0.00309	-0.02319	-0.02075		0.007188	0.025844	-0.02131	0		0.069703	0.093312	0.057125	0.011625		0.022844	-0.00231	-0.01262	0.005875
	-0.00309	-0.05131	-0.02075	0.012625		0.031703	0.095102	0	0.025313		0.093312	0.099688	0.011625	0.080875		-0.00231	0.002	0.005875	0.01125
	0.008844	-0.00455	-0.116	-0.04664		0.095102	0.128898	0.027625	-0.01006		0.143	0.091656	-0.11459	0.092156		0.030148	0.040852	0.11075	0.09475
	-0.00455	-0.0192	-0.04664	0.070812		0.128898	0.073797	-0.01006	0.085375		0.091656	-0.00891	0.092156	-0.00119		0.040852	0.069602	0.09475	0.060437
	-0.0192	-0.088	0.070812	-0.014		0.073797	0.152953	0.085375	-0.04362		-0.00891	0.016703	-0.00119	0.05525		0.069602	0.050148	0.060437	0.060875
	-0.088	0.050797	-0.014	0.075		0.152953	0.130844	-0.04362	0.0135		0.016703	0.0265	0.05525	-0.02884		0.050148	0.039797	0.060875	0.101375
	0.050797	-0.057	0.075	-0.073		0.130844	0.083047	0.0135	-0.02725		0.0265	0.041	-0.02884	0.052906		0.039797	0.042703	0.101375	0.075875
	-0.057	0.150453	-0.073	0.121625		0.083047	0.062	-0.02725	-0.02662		0.041	0	0.052906	0.083844		0.042703	0.07025	0.075875	0.083
	0.150453	-0.091	0.121625	-0.004		0.062	0.078453	-0.02662	0.039188		0	0.10725	0.083844	0.055094		0.07025	0.058656	0.083	0.114375
	-0.091	0.017656	-0.004	-0.086		0.078453	0.08125	0.039188	0.013562		0.10725	0.074109	0.055094	0.103		0.058656	0.086344	0.114375	0.100375
	0.017656	-0.01516	-0.086	0.042125		0.08125	0.114953	0.013562	0.033125		0.074109	0.019359	0.103	0.093656		0.086344	0.092594	0.100375	0.032875
	-0.01516	-0.0318	0.042125	0.103625		-0.04595	0.045203	0.033125	0.007438		0.019359	0.128594	0.093656	0.0685		0.092594	0.047406	0.032875	0.081125
	-0.0318	-0.02009	0.103625	0.042		0.045203	0.056797	0.007438	-0.03663		0.128594	0.014203	0.0685	-0.07481		0.047406	0.036453	0.081125	0.11425
	-0.02009	0.103656	0.042	-0.03069		0.056797	0.027391	-0.03663	0.038312		0.014203	0.03275	-0.07481	-0.00056		0.036453	0.034953	0.11425	0.050187
	0.103656	-0.05091	-0.03069	0.043437		0.027391	0.0205	0.038312	0.020875		0.03275	0.093688	-0.00056	0.067156		0.034953	0.051797	0.050187	0.010625
	-0.05091	-0.1134	0.043437	-0.009		0.0205	0.009844	0.020875	0.051625		0.093688	0.069453	0.067156	0.005		0.051797	0.035706	0.010625	0.114188
	-0.1134	0.049797	-0.009	0.028375		0.009844	-0.0005	0.051625	-0.053		0.069453	0.039063	0.005	0.077688		0.035706	0.040344	0.114188	0.071813
	0.049797	0.073297	0.028375	0.093375		-0.0005	0.036844	-0.053	0.020562		0.039063	0.045797	0.077688	0.142813		0.040344	0.038797	0.071813	0.094437
	0.073297	0.000547	0.093375	-0.069		0.036844	-0.0307	0.020562	-0.06225		0.045797	0.031547	0.142813	0.031937		0.038797	0.042906	0.094437	0.127625
	0.000547	-0.0345	-0.069	0.011		-0.0307	-0.0425	-0.06225	0.09875		0.031547	0.064859	0.031937	0.144187		0.042906	0.040156	0.127625	0.049188
	-0.0345	0.033	0.011	-0.068		-0.0425	0.011156	0.09875	0.081875		0.064859	0.04925	0.077156	0.108906		0.040156	0.055094	0.049188	0.052375
	-0.059	0.134297	0.040313	0.132125		0.011156	-0.02075	0.00775	-0.06156		0.094547	0.099852	0.108906	0.123562		0.113648	0.060102	0.109187	0.05325
	0.134297	0.094156	0.132125	0.057125		-0.02075	0.044469	-0.06156	-0.0495		0.099852	0.082398	0.123562	0.194437		0.060102	0.035797	0.05325	0.102156
	0.094156	0.130594	0.057125	0.039188		0.044469	0.037219	-0.0495	-0.01419		0.082398	0.114953	0.194437	0.097344		0.035797	0.103547	0.102156	0.078
	0.130594	-0.0315	0.039188	-0.0192		0.037219	-0.01925	-0.01419	-0.01662		0.114953	0.08875	0.097344	0.115937		0.103547	0.078047	0.078	0.090937
	-0.0315	0.076203	-0.0192	0.115125		-0.01925	0.004063	-0.01662	0.078437		0.08875	0.088344	0.115937	0.273656		0.078047	0.06475	0.090937	0.075312
	0.076203	0.04975	0.115125	0.063625		0.004063	0.064281	0.078437	0.04625		0.088344	0.099203	0.273656	0.078906		0.06475	0.049602	0.075312	0.04075
	0.04975	0.123594	0.063625	0.135937		0.064281	-0.02272	0.04625	0.096875		0.099203	0.053297	0.078906	0.289		0.049602	0.074148	0.04075	0.086312
	0.123594	-0.06431	0.135937	0.09125		-0.02272	-0.01303	0.096875	-0.03456		0.053297	0.10225	0.289	0.08675		0.074148	0.032594	0.086312	0.093313
	-0.06431	-0.02369	0.09125	-0.041		-0.01303	0.022063	-0.03456	0.035562		0.10225	0.060297	0.08675	0.114906		0.032594	0.048094	0.093313	0.0745
	-0.02369	0.082063	-0.041	0.099				0.035562	0.19125		0.060297	0.100453	0.114906	0.146937		0.048094	0.084547	0.0745	0.091812
	0.082063	0.021	0.099	0.078125				0.19125	0.154063		0.100453	0.0885	0.146937	0.084563		0.084547	0.056297	0.091812	0.092688
	0.021	0.124312	0.078125	0.000188				0.154063	0.048437		0.0885	0.13775	0.084563	0.107		0.056297	0.043344	0.092688	0.08475
	0.124312	0.079094	0.000188	0.199375				0.048437	0.069625		0.13775	0.170156	0.107	0.085		0.043344	0.035906	0.08475	0.078375
	0.079094	0.158562	0.199375	0.108875				0.069625	0.087187		0.170156	0.121844	0.085	0.105188		0.035906	0.060703	0.078375	0.052812
	0.158562	0.129	0.108875	0.020938				0.087187	-0.05925		0.121844	0.07325	0.105188	0.168844		0.060703	0.035797	0.052812	0.093375
	0.129	-0.06975	0.020938	0.04575				-0.05925	0.036375		0.07325	0.083953	0.168844	0.112438		0.035797	0.053297	0.093375	0.079875
	-0.06975	0.061656	0.04575	-0.091				0.036375	0.011813		0.083953	0.088547	0.112438	0.133125		0.053297	0.030703	0.079875	0.08
	0.061656	0.172406	-0.091	-0.068				0.011813	0.005063		0.088547	0.047906	0.133125	0.113125		0.030703	0.032797	0.08	0.113375
	-0.114	0.055906	-0.03119	-0.018				0.005063	0.020875		0.047906	0.114047	0.012656	0.05575		-0.02225	-0.0045	0.113375	0.109375
	0.055906	0.040844	-0.018	0.156							-0.12766	0.0555	0.05575	-0.13456		-0.0045	0.0265	-0.05427	-0.14538
	0.040844	0.084	0.156	0.040188							0.0555	0.031594	-0.13456	0.091938		0.0265	0.008344	-0.14538	-0.11825
	0.084	0.069594	0.040188	-0.00394							0.031594	0.0633	0.091938	0.06575		0.008344	-0.04294	-0.11825	-0.02162
	0.069594	0.107203	-0.00394	0.126438							0.0633	0.055844	0.06575	0.002063		-0.04294	0.032156	-0.02162	0.02375
	0.107203	-0.00241	0.126438	6.25e-05							0.055844	0.046203	0.002063	0.048344		0.032156	-0.05316	0.02375	-0.01156
	-0.00241	-0.059	6.25e-05	0.041625							0.046203	0.020094	0.048344	0.092438		-0.05316	-0.04541	-0.01156	0.017687
	-0.059	-0.0227	0.041625	-0.0105							0.020094	0.014656	0.092438	0.000844		-0.04541	0.033438	0.017687	-0.03613
	-0.0227	-0.11966	-0.0105	-0.209							0.014656	0.0125	0.000844	-0.0005		0.033438	0.046344	-0.03613	-0.033
	-0.11966	-0.02244	-0.209	0.036938							0.0125	0.008047	-0.0005	0.034406		0.046344	-0.00019	-0.033	0.023
	-0.02244	0.035594	0.036938	0.042812							0.008047	0.00725	0.034406	0.086937		-0.00019	0.031094	0.023	-0.01737
	0.035594	0.007937	0.042812	0.002062							0.00725	0.043953	0.086937	-0.00134		0.031094	0.013312	-0.01737	-0.03175
	0.007937	-0.0315	0.002062	0.12775							0.043953	0.087	-0.00134	0.045562		0.013312	0.011812	-0.03175	-0.0275
	-0.0315	-0.00384	0.12775	-0.008							0.087	0.050094	0.045562	0.083		0.011812	-0.02275	-0.0275	0.012062
	-0.00384	0.037656	-0.008	0.059							0.050094	0.057	0.083	0.021344		-0.02275	0.024188	0.012062	-0.118
	0.037656	0.020844	0.059	0.093688							0.057	-0.03366	0.021344	0.031406		0.024188	-0.01281	-0.118	-0.015
	0.020844	-0.03469	0.093688	0.042							-0.03366	0.053	0.031406	-0.03919		-0.01281	0.036906	-0.015	-0.02019
	-0.03469	-0.02134	0.042	-0.144							0.053	0.054344	-0.03919	0.031563		0.036906	0.051813	-0.02019	0.085
	-0.02134	0.045312	-0.144	0.028375							0.054344	0.025703	0.051688	0.018063		0.051813	0.046	0.085	0.040625
	0.043	0.125297	0.034094	0.059812							0.010344	0.010797	0.018063	-0.05612		0.089	-0.01015	0.040625	0.020937
	0.125297	0.075	0.059812	0.014938							0.010797	0.026797	-0.05612	0.056125		-0.01015	-0.02575	-0.01291	0.05375
	0.075	0.1495	0.014938	0.131937							0.026797	0.014047	0.056125	0.007875		-0.02575	-0.02765	0.05375	0.176156
	0.1495	-0.05695	0.131937	0.008							0.014047	0.041	0.007875	-0.01063		-0.02765	-0.05675	0.176156	-0.03825
	-0.05695	0.119	0.008	0.085844							0.041	0.014047	-0.01063	0.053937		-0.05675	0.033102	-0.03825	0.157906
	0.119	0.031547	0.085844	-0.01584							0.014047	0.038703	0.053937	0.0425		0.033102	0.019648	0.157906	0.0405
	0.031547	-0.01005	-0.01584	0.08825							0.038703	0.034594	0.0425	0.062		0.019648	-0.0853	0.0405	0.110687
	-0.01005	0.141594	0.08825	0.1395							0.034594	0.032144	0.062	-0.00463		-0.0853	-0.07509	0.110687	0.078594
	0.141594	-0.0295	0.1395	0.014844							0.032144	0.016156	-0.00463	-0.04306		-0.07509	-0.043	0.078594	0.08075
	-0.0295	0.020703	0.014844	0.109062							0.016156	0.033813	-0.04306	0.025625		-0.043	-0.01009	0.08075	0.082062
	0.020703	0.09625	0.109062	0.0245							0.033813	0.022344	0.025625	-0.00037		-0.01009	0.013547	0.082062	-0.05156
	0.09625	-0.08809	0.0245	0.081344							0.022344	0.046406	-0.00037	0.012125		0.013547	-0.03675	-0.05156	-0.01591
	-0.08809	0.005406	0.081344	0.103844							0.046406	0.005844	0.012125	0.0035		-0.03675	-0.00459	-0.01591	-0.00119
	0.005406	-0.025	0.103844	0.042094							0.005844	0.02175	0.0035	-0.00156		-0.00459	-0.0157	-0.00119	0.154406
	-0.025	0.116203	0.042094	0.0149							0.02175	0.034094	-0.00156	-0.01063		-0.0157	0.019656	0.154406	0.004
	0.116203	-0.0322	0.0149	0.047906							0.034094	0.011937	-0.01063	-0.03138		0.019656	0.000547	0.004	0.003563
	-0.0322	0.107297	0.047906	0.021062							0.011937	-0.00459	-0.03138	0.0225		0.000547	0.006447	0.003563	-0.02909
	0.107297	0.051	0.021062	0.005094							-0.00459	0.02725	0.0225	0.024125		0.006447	-0.00116	-0.02909	-0.01869
	0.051	0.016156	0.005094	-0.06231							0.02725	0.033187	0.09075	0.061937		-0.00116	-0.03616	-0.01869	0.019563
	0.030656	0.129406	0.039937	-0.054							0.066594	0.053047	0.061937	-0.02219				0.019563	0.018906
	0.129406	0.031406	-0.054	0.029688							0.053047	0.043344	-0.02219	0.032656
	0.031406	0.08925	0.029688	0.061875							0.043344	0.048297	0.032656	0.033
	0.08925	-0.01659	0.061875	0.003687							0.048297	0.061547	0.033	0.097562
	-0.01659	0.049156	0.003687	0.027							0.061547	0.050344	0.097562	0.032094
	0.049156	0.097438	0.027	0.054875							0.050344	0.077844	0.032094	0.060313
	0.097438	0.030594	0.054875	-0.01275							0.077844	0.070156	0.060313	0.069594
	0.030594	-0.017	-0.01275	0.025875							0.070156	0.069797	0.069594	0.059937
	-0.017	0.037594	0.025875	-0.027							0.069797	0.109844	0.059937	-0.00391
	0.037594	0.078656	-0.027	-0.149							0.109844	0.102344	-0.00391	0.039344
	0.078656	0.099	-0.149	0.022							0.102344	0.047797	0.039344	0.062594
	0.099	-0.022	0.022	0.055562							0.047797	0.062	0.062594	0.051844
	-0.022	0.066062	0.055562	0.005							0.062	0.079547	0.051844	0.148406
	0.066062	0.053687	0.005	0.042875							0.079547	0.0595	0.148406	0.004156
	0.053687	-0.063	0.042875	0.040687							0.0595	0.090953	0.004156	0.051312
	-0.063	-0.008	0.040687	0.032							0.090953	0.105797	0.051312	0.025594
	-0.008	0.024563	0.032	0.038125							0.105797	0.03275	0.025594	0.018563
	0.024563	0.085688	0.038125	0.025625							0.03275	0.087547	0.018563	0.080844
	0.085688	-0.051	0.025625	0.0765							0.087547	0.04025
	0.252563	0.005313	0.002125	0.191563
	0.005313	0.000938	0.191563	-0.14913
	0.000938	0.143594	-0.14913	0.144125
	0.143594	0.247844	0.144125	0.108875
	0.247844	0.08125	0.108875	0.053
	0.08125	0.083	0.053	0.102938
	0.083	0.033656	0.102938	0.159375
	0.033656	0.131906	0.159375	0.166375
	0.131906	0.1875	0.166375	-0.00981
	0.1875	0.041438	-0.00981	0.098125
	0.041438	0.168688	0.098125	-0.06294
	0.168688	0.135375	-0.06294	0.09
	0.135375	0.170187	0.09	-0.08644
	0.170187	0.278875	-0.08644	0.039187
	0.278875	0.057844	0.039187	0.232375
	0.057844	0.04	0.232375	0.067688
	0.04	0.214406	0.067688	0.082125
	0.214406	0.131438	0.082125	0.032063
	0.131438	-0.01775	0.032063	0.188063

## Sheet: Fig.6B
		Onset Jitter ln(RMSSD)
		Excitatory with Pre-I														Paired t test (two-tailed)
		Bio Rep #1	Bio Rep #2	Bio Rep #3	Bio Rep #4	Bio Rep #5	Bio Rep #6	Bio Rep #7	Bio Rep #8	Bio Rep #9		Mean	SE	N		P value	0.5996
	Baseline	-2.08143	-2.55345	-2.13105	-2.71003	-2.19069	-2.20269	-2.78713	-2.59367	-2.3303		-2.398	0.08885	9		t, df	t=0.5466 df=8
	substance P	-1.8408	-2.71948	-2.58479	-2.08823	-2.34685	-2.28156	-2.3374	-1.97746	-2.72021		-2.322	0.1049	9
		Excitatory without Pre-I: (recruited to pre-I)														Paired t test (two-tailed)
		Bio Rep #1	Bio Rep #2	Bio Rep #3	Bio Rep #4	Bio Rep #5						Mean	SE	N		P value	0.0201
	Baseline	-3.08005	-3.13048	-3.70497	-2.77027	-3.60014						-3.257	0.1736	5		t, df	t=3.739 df=4
	substance P	-2.57561	-2.64209	-3.17822	-2.75979	-2.83782						-2.799	0.1052	5
		Excitatory without Pre-I: (not recruited to pre-I)														Paired t test (two-tailed)
		Bio Rep #1	Bio Rep #2	Bio Rep #3	Bio Rep #4	Bio Rep #5	Bio Rep #6	Bio Rep #7	Bio Rep #8			Mean	SE	N		P value	0.0008
	Baseline	-3.46048	-3.9091	-2.87607	-3.32575	-2.85312	-3.37122	-2.86797	-3.72966			-3.299	0.1435	8		t, df	t=5.678 df=7
	substance P	-2.84748	-3.06242	-2.44324	-2.33231	-2.42074	-2.10158	-2.25495	-3.49364			-2.62	0.1673	8
		Inhibitory														Paired t test (two-tailed)
		Bio Rep #1	Bio Rep #2	Bio Rep #3	Bio Rep #4	Bio Rep #5	Bio Rep #6	Bio Rep #7				Mean	SE	N		P value	0.6915
	Baseline	-3.08684	-3.15487	-3.51026	-4.02095	-2.99928	-2.52935	-3.53874				-3.263	0.1801	7		t, df	t=0.4165 df=6
	substance P	-2.29622	-2.78109	-3.59933	-3.09557	-3.54752	-3.11269	-3.73404				-3.167	0.1932	7

## Sheet: Fig.6C
		preBotC population bursts
		Burst Duration (s)																																		Paired t test (two-tailed)
		Bio Rep #1	Bio Rep #2	Bio Rep #3	Bio Rep #4	Bio Rep #5	Bio Rep #6	Bio Rep #7	Bio Rep #8	Bio Rep #9	Bio Rep #10	Bio Rep #11	Bio Rep #12	Bio Rep #13	Bio Rep #14	Bio Rep #15	Bio Rep #16	Bio Rep #17	Bio Rep #18	Bio Rep #19	Bio Rep #20	Bio Rep #21	Bio Rep #22	Bio Rep #23	Bio Rep #24	Bio Rep #25	Bio Rep #26	Bio Rep #27	Bio Rep #28	Bio Rep #29		Mean	SE	N		P value	<0.0001
	Baseline	0.582449	0.712684	0.570886	0.616466	0.629027	0.762158	1.02281	0.701038	0.69824	0.62249	0.782487	0.758997	0.660297	0.737098	0.839109	0.834089	0.845947	0.655246	0.93498	0.567578	0.655192	0.726616	0.427962	0.67175	0.715454	0.632708	0.699822	0.733181	0.710426		0.707	0.022	29		t, df	t=6.200 df=28
	substance P	0.606688	0.828337	0.770906	0.858946	0.751188	0.813413	1.18451	0.785103	0.632344	0.937176	0.898849	0.965583	0.721744	0.832406	0.959566	0.804196	1.03326	0.737972	1.43216	0.702667	0.6554	0.890938	0.726672	0.629607	1.10613	0.86075	0.919852	0.940011	0.770039		0.854	0.033	29
		Half-Width (s)																																		Paired t test (two-tailed)
		Bio Rep #1	Bio Rep #2	Bio Rep #3	Bio Rep #4	Bio Rep #5	Bio Rep #6	Bio Rep #7	Bio Rep #8	Bio Rep #9	Bio Rep #10	Bio Rep #11	Bio Rep #12	Bio Rep #13	Bio Rep #14	Bio Rep #15	Bio Rep #16	Bio Rep #17	Bio Rep #18	Bio Rep #19	Bio Rep #20	Bio Rep #21	Bio Rep #22	Bio Rep #23	Bio Rep #24	Bio Rep #25	Bio Rep #26	Bio Rep #27	Bio Rep #28	Bio Rep #29		Mean	SE	N		P value	0.0004
	Baseline	0.330376	0.382676	0.345078	0.378854	0.422438	0.48633	0.637276	0.404487	0.355575	0.348871	0.465502	0.417016	0.433977	0.47201	0.511823	0.468198	0.556742	0.451053	0.741266	0.333409	0.398865	0.429273	0.270237	0.409756	0.437645	0.344212	0.407741	0.424696	0.373505		0.429	0.0177	29		t, df	t=4.012 df=28
	substance P	0.352225	0.383433	0.413462	0.464175	0.48444	0.50211	0.673607	0.508046	0.374182	0.47672	0.502577	0.453707	0.428168	0.501003	0.557512	0.405558	0.506104	0.452247	0.9149	0.522911	0.402551	0.436002	0.449786	0.342087	0.543374	0.406593	0.454599	0.514859	0.423602		0.0478	0.02	29
