# Supplementary material for: Insights into the dynamic control of breathing revealed through cell-type-specific responses to substance P
Source: eLife. 2019 Dec 5;8:e51350. doi: 10.7554/eLife.51350 (PMC6957314; doi:10.7554/eLife.51350)
Supplement: Figure 8—source data 1. [file elife-51350-fig8-data1.xlsx]

## Sheet: Fig.8A
	Excitatory Rostral Neurons: Inspiratory Burst Spike Frequency (Hz)
	Baseline											substance P
	Bin Center (a.u.)	Bio Rep #1	Bio Rep #2	Bio Rep #3	Bio Rep #4	Bio Rep #5		Mean	SE	N		Bin Center (a.u.)	Bio Rep #1	Bio Rep #2	Bio Rep #3	Bio Rep #4	Bio Rep #5		Mean	SE	N
	-1	0.533147	0.956861	0.14286	0.124344	0.365237		0.42449	0.152993	5		-1	0.219268	0.048905	0.170885	0.153583	0.38194		0.194916	0.0543949	5
	-0.9	0.533147	0.956861	0.14286	0.124344	0.365237		0.42449	0.152993	5		-0.9	0.219268	0.048905	0.170885	0.153583	0.38194		0.194916	0.0543949	5
	-0.8	0.291059	0.814992	0.14286	0.124344	0.365237		0.347698	0.125245	5		-0.8	0.219268	0.048905	0.170885	0.153583	0.38194		0.194916	0.0543949	5
	-0.7	0.291059	0.814992	0.14286	0.124344	0.365237		0.347698	0.125245	5		-0.7	0.219268	0.048905	0.170885	0.153583	0.38194		0.194916	0.0543949	5
	-0.6	0.291059	0.741432	0.14286	0.124344	0.365237		0.332986	0.111648	5		-0.6	0.219268	0.048905	0.170885	0.153583	0.38194		0.194916	0.0543949	5
	-0.5	0.291059	0.741432	0.14286	0.124344	0.365237		0.332986	0.111648	5		-0.5	0.219268	0.048905	0.170885	0.153583	0.38194		0.194916	0.0543949	5
	-0.4	0.291059	0.756992	0.14286	0.124344	0.365237		0.336098	0.114501	5		-0.4	0.219268	0.048905	0.170885	0.153583	0.38194		0.194916	0.0543949	5
	-0.3	0.291059	0.756992	0.14286	0.124344	0.365237		0.336098	0.114501	5		-0.3	0.219268	0.048905	0.170885	0.153583	0.38194		0.194916	0.0543949	5
	-0.2	0.291059	0.836137	0.14286	0.124344	0.365237		0.351927	0.129198	5		-0.2	0.219268	0.048905	0.170885	0.153583	0.38194		0.194916	0.0543949	5
	-0.1	0.291059	0.899212	0.14286	0.124344	1.35801		0.563096	0.243717	5		-0.1	0.219268	0.048905	0.170885	0.153583	0.38194		0.194916	0.0543949	5
	0	0.291059	0.899212	0.14286	0.124344	1.28537		0.548569	0.232024	5		0	0.603775	0.048905	0.170885	0.153583	0.38194		0.271818	0.0990403	5
	0.1	0.291059	0.899212	67.922	3.8992	3.42452		15.2872	13.1771	5		0.1	2.87564	0.048905	59.7655	0.153583	1.50204		12.8691	11.7354	5
	0.2	4.34123	1.38193	65.731	13.4405	11.5511		19.2891	11.8217	5		0.2	6.51803	0.048905	49.9683	1.67838	1.38023		11.9188	9.57537	5
	0.3	7.05673	4.73689	49.8008	10.8091	34.1868		21.3181	8.84767	5		0.3	7.32729	0.048066	36.0415	2.6343	7.18617		10.6475	6.49776	5
	0.4	10.8808	4.18847	34.9722	5.51029	41.63		19.4364	7.85351	5		0.4	4.32918	0.048066	33.8493	1.04472	15.9233		11.0389	6.36346	5
	0.5	7.64102	3.57255	19.4313	1.48624	34.6662		13.3595	6.16564	5		0.5	2.10844	0.048066	13.3984	0.652669	17.9255		6.82662	3.69257	5
	0.6	5.04435	4.65458	4.60095	0.227428	16.0482		6.11511	2.63537	5		0.6	0.402371	0.049774	1.0164	0.358099	15.6752		3.50037	3.04774	5
	0.7	1.47469	5.04549	1.58175	0.124999	4.34926		2.51524	0.933626	5		0.7	0.402371	0.485388	0.170824	0.353611	7.0097		1.68438	1.33233	5
	0.8	0.548922	5.32901	0.142579	0.124999	0.37156		1.30341	1.00944	5		0.8	0.543441	0.504657	0.170824	0.151464	4.08065		1.09021	0.752033	5
	0.9	0.548922	5.21454	0.142579	0.124999	0.37156		1.28052	0.986612	5		0.9	0.219422	0.343371	0.170824	0.151464	1.8689		0.550796	0.331215	5
	1	0.548922	3.61233	0.142579	0.124999	0.37156		0.960077	0.667663	5		1	0.219422	1.34636	0.170824	0.151464	0.852846		0.548182	0.238513	5
	1.1	0.548922	1.94519	0.142579	0.124999	0.37156		0.626651	0.338795	5		1.1	0.219422	0.582164	0.170824	0.151464	0.367682		0.298311	0.0804442	5
	1.2	0.548922	1.34884	0.142579	0.124999	0.37156		0.50738	0.224447	5		1.2	0.219422	0.049168	0.170824	0.151464	0.367682		0.191712	0.0520136	5
	1.3	0.548922	0.943276	0.142579	0.124999	0.37156		0.426267	0.151092	5		1.3	0.219422	0.049168	0.170824	0.151464	0.367682		0.191712	0.0520136	5
	1.4	0.548922	0.943276	0.142579	0.124999	0.37156		0.426267	0.151092	5		1.4	0.219422	0.049168	0.170824	0.151464	0.367682		0.191712	0.0520136	5
	1.5	0.548922	0.753129	0.142579	0.124999	0.37156		0.388238	0.120184	5		1.5	0.219422	0.049168	0.170824	0.151464	0.367682		0.191712	0.0520136	5
	1.6	0.548922	0.753129	0.142579	0.124999	0.37156		0.388238	0.120184	5		1.6	0.219422	0.049168	0.170824	0.151464	0.367682		0.191712	0.0520136	5
	1.7	0.548922	0.753129	0.142579	0.124999	0.37156		0.388238	0.120184	5		1.7	0.219422	0.049168	0.170824	0.151464	0.367682		0.191712	0.0520136	5
	1.8	0.548922	0.753129	0.142579	0.124999	0.37156		0.388238	0.120184	5		1.8	0.219422	0.049168	0.170824	0.151464	0.367682		0.191712	0.0520136	5
	1.9	0.548922	0.770815	0.142579	0.124999	0.37156		0.391775	0.122891	5		1.9	0.219422	0.049168	0.170824	0.151464	0.367682		0.191712	0.0520136	5
	2	0.548922	0.919079	0.142579	0.124999	0.37156		0.421428	0.146974	5		2	0.219422	0.049168	0.170824	0.151464	0.367682		0.191712	0.0520136	5
	Average spike frequency during bursts (Hz)											Paired t test (two-tailed)
		Bio Rep #1	Bio Rep #2	Bio Rep #3	Bio Rep #4	Bio Rep #5		Mean	SE	N		P value	0.0191
	Baseline	4.20308	3.89141	27.1472	3.97197	16.2888		11.1	4.662	5		t, df	t=3.802 df=4
	substance P	2.74735	0.297155	21.6169	0.797588	8.0613		6.704	3.974	5

## Sheet: Fig.8B
	Inhibitory Rostral Neurons: Inspiratory Burst Spike Frequency (Hz)
	Baseline													substance P
	Bin Center (a.u.)	Bio Rep #1	Bio Rep #2	Bio Rep #3	Bio Rep #4	Bio Rep #5	Bio Rep #6	Bio Rep #7		Mean	SE	N		Bin Center (a.u.)	Bio Rep #1	Bio Rep #2	Bio Rep #3	Bio Rep #4	Bio Rep #5	Bio Rep #6	Bio Rep #7		Mean	SE	N
	-1	4.20037	0.869219	2.74837	0.343949	1.19034	0.26371	0.29204		1.41543	0.569423	7		-1	5.15965	9.70132	0.88368	0.401998	2.46211	1.59287	2.02386		3.17507	1.23257	7
	-0.9	4.42155	0.784133	2.84682	0.343949	0.942403	0.26371	0.29204		1.41352	0.606404	7		-0.9	5.58123	9.18202	0.801051	0.401998	2.57148	1.77181	1.81652		3.16087	1.189	7
	-0.8	4.56414	0.784133	2.97673	0.343949	0.942403	0.26371	0.29204		1.45244	0.630594	7		-0.8	5.18772	10.0506	1.23401	0.401998	2.81937	1.80659	2.21563		3.38799	1.24771	7
	-0.7	5.05131	0.784133	2.99762	0.343949	0.942403	0.26371	0.29204		1.52502	0.690026	7		-0.7	5.89591	9.92802	1.23401	0.401998	2.60618	1.82955	2.13253		3.4326	1.2651	7
	-0.6	4.69631	0.887992	2.76232	0.343949	1.07664	0.26371	0.29204		1.47471	0.630253	7		-0.6	6.92437	9.52692	1.23401	0.401998	2.65227	2.0406	1.97429		3.53635	1.27195	7
	-0.5	5.06393	0.887992	2.80124	0.343949	1.03633	0.26371	0.29204		1.52703	0.677939	7		-0.5	6.19717	9.13528	1.23401	0.401998	2.99579	1.9818	1.83766		3.39767	1.18535	7
	-0.4	4.3207	1.03156	2.91	0.343949	1.03633	0.26371	0.29204		1.4569	0.591405	7		-0.4	5.16652	9.33456	1.23401	0.401998	3.11081	2.12066	1.88862		3.32245	1.15451	7
	-0.3	4.81499	1.33546	3.04246	0.343949	1.25001	0.26371	0.29204		1.62037	0.648818	7		-0.3	6.34345	9.14425	1.23401	0.401998	2.87285	2.28442	1.88862		3.4528	1.1865	7
	-0.2	4.62981	1.45513	3.08061	0.343949	1.24628	0.26371	0.29204		1.61593	0.628498	7		-0.2	6.3454	9.60204	1.84331	0.401998	2.95763	2.52741	1.7299		3.62967	1.21429	7
	-0.1	4.9407	1.45513	3.70899	0.343949	1.24628	0.26371	0.37456		1.7619	0.697543	7		-0.1	6.43476	9.90185	3.45899	0.401998	2.95763	2.42669	1.86639		3.92119	1.21566	7
	0	6.35487	1.96926	5.25199	0.343949	1.75335	0.26371	0.563038		2.35717	0.932626	7		0	7.57935	10.1202	4.76439	0.401998	3.6801	2.58951	1.84836		4.42627	1.28404	7
	0.1	10.615	2.39796	11.5157	0.343949	2.75617	0.572494	0.563038		4.10917	1.83355	7		0.1	11.5608	10.2528	9.04798	0.401998	4.36565	4.09444	1.90772		5.94735	1.63785	7
	0.2	14.6085	4.58837	18.7848	7.16008	4.66331	6.9135	0.563038		8.18308	2.38905	7		0.2	15.1011	12.361	14.7387	1.32584	5.6837	6.90949	2.14837		8.32404	2.17924	7
	0.3	14.6372	8.93478	21.6639	8.20691	5.1446	6.86548	0.563038		9.43084	2.5916	7		0.3	13.4269	12.7927	14.8674	2.77983	4.39141	6.64945	2.42048		8.18975	2.02695	7
	0.4	12.9728	8.93478	14.4367	3.55574	4.3689	5.87612	0.740406		7.26935	1.9114	7		0.4	12.7473	13.7496	13.4023	1.07212	3.72109	6.01143	2.73252		7.63376	2.08078	7
	0.5	13.1359	9.90572	9.32116	2.79417	3.38347	3.53517	0.839807		6.13077	1.73831	7		0.5	9.99136	12.5327	8.80551	0.757694	3.90664	4.07304	3.98789		6.29354	1.5849	7
	0.6	11.3593	7.8584	6.20983	0.528764	1.75924	1.59504	2.24633		4.50813	1.52793	7		0.6	10.2563	11.4573	4.13004	0.402857	2.9184	3.73719	6.54767		5.63567	1.51744	7
	0.7	8.86705	5.42303	3.13642	0.364735	1.12341	0.26795	4.25198		3.3478	1.18485	7		0.7	8.68479	10.4474	1.44902	0.402857	2.31383	2.25797	6.73392		4.61282	1.49353	7
	0.8	9.3403	2.70206	2.39982	0.364735	0.92021	0.26795	1.39892		2.48486	1.19611	7		0.8	6.72315	10.2708	1.06049	0.402857	2.01895	1.58202	6.03367		4.01314	1.39919	7
	0.9	7.33454	2.40644	2.05401	0.364735	0.92021	0.26795	1.08517		2.06187	0.929357	7		0.9	5.86445	10.7487	0.748154	0.402857	1.86327	1.58202	5.70997		3.84564	1.42849	7
	1	6.38532	1.48607	2.06312	0.364735	1.20064	0.26795	1.16603		1.8477	0.792003	7		1	4.33647	9.74874	0.748154	0.402857	1.86327	1.68409	7.38316		3.73811	1.35901	7
	1.1	5.17662	1.26344	1.90136	0.364735	1.20064	0.26795	0.300838		1.49651	0.655905	7		1.1	5.60748	9.66076	0.748154	0.402857	1.95145	1.53591	4.73109		3.51967	1.26613	7
	1.2	4.72915	1.08299	2.93963	0.364735	0.793722	0.26795	0.300838		1.497	0.643971	7		1.2	4.81875	9.48347	0.748154	0.402857	1.95145	1.28348	4.23072		3.27413	1.21688	7
	1.3	5.03726	1.08299	2.71693	0.364735	0.793722	0.26795	0.300838		1.5092	0.670998	7		1.3	4.50476	8.38133	0.748154	0.402857	2.42063	1.28348	4.17642		3.13109	1.06441	7
	1.4	4.72084	0.989394	1.97487	0.364735	0.793722	0.26795	0.300838		1.34462	0.60621	7		1.4	4.62436	8.13584	0.739511	0.402857	2.55971	1.33529	4.06432		3.12313	1.03351	7
	1.5	4.71989	0.989394	1.93933	0.364735	0.812674	0.26795	0.300838		1.34211	0.604824	7		1.5	5.14977	7.99521	0.943003	0.402857	2.66078	1.33233	3.02771		3.07309	1.01664	7
	1.6	3.75649	0.769957	1.98488	0.364735	0.812674	0.26795	0.300838		1.17965	0.484489	7		1.6	4.32297	8.20413	0.98016	0.402857	2.21076	1.47859	2.08434		2.81197	1.01403	7
	1.7	3.24332	0.722095	1.94428	0.364735	1.129	0.26795	0.300838		1.13889	0.417226	7		1.7	5.72257	8.36252	0.740511	0.402857	1.81182	1.47859	1.90626		2.91787	1.12223	7
	1.8	3.48884	0.722095	1.849	0.364735	1.14706	0.26795	0.300838		1.16293	0.443376	7		1.8	4.25967	8.01845	0.740511	0.402857	2.30831	1.69861	1.75969		2.74116	0.998373	7
	1.9	3.58506	0.722095	2.11375	0.364735	1.07008	0.26795	0.300838		1.2035	0.466587	7		1.9	4.25974	8.48882	0.797657	0.402857	2.45259	1.69861	1.83167		2.84742	1.05226	7
	2	3.49495	0.722095	2.27402	0.364735	1.03834	0.26795	0.300838		1.20899	0.464173	7		2	4.27912	9.37157	0.837649	0.402857	2.42164	1.89507	1.83167		3.00565	1.16061	7
	Average spike frequency during bursts (Hz)													Paired t test (two-tailed)
		Bio Rep #1	Bio Rep #2	Bio Rep #3	Bio Rep #4	Bio Rep #5	Bio Rep #6	Bio Rep #7		Mean	SE	N		P value	0.4972
	Baseline	11.43	5.90573	9.94692	2.63154	2.78217	2.90685	1.3613		5.281	1.498	7		t, df	t=0.7225 df=6
	substance P	10.484	11.6237	7.5833	0.883212	3.46477	4.09967	4.24691		6.055	1.492	7

## Sheet: Fig.8C
	All Rostral Neurons: Inspiratory Burst Spike Frequency (Hz)
	Baseline																						substance P
	Bin Center (a.u.)	Bio Rep #1	Bio Rep #2	Bio Rep #3	Bio Rep #4	Bio Rep #5	Bio Rep #6	Bio Rep #7	Bio Rep #8	Bio Rep #9	Bio Rep #10	Bio Rep #11	Bio Rep #12	Bio Rep #13	Bio Rep #14	Bio Rep #15	Bio Rep #16		Mean	SE	N		Bin Center (a.u.)	Bio Rep #1	Bio Rep #2	Bio Rep #3	Bio Rep #4	Bio Rep #5	Bio Rep #6	Bio Rep #7	Bio Rep #8	Bio Rep #9	Bio Rep #10	Bio Rep #11	Bio Rep #12	Bio Rep #13	Bio Rep #14	Bio Rep #15	Bio Rep #16		Mean	SE	N
	-1	0.533147	0.956861	0.14286	0.124344	0.365237	4.20037	0.869219	2.74837	0.343949	1.19034	0.26371	0.29204	2.53554	0.938121	2.87563	0.779372		1.23375	0.318676	16		-1	0.219268	0.048905	0.170885	0.153583	0.38194	5.15965	9.70132	0.88368	0.401998	2.46211	1.59287	2.02386	2.91659	1.99447	6.36627	0.710639		2.17372	0.683091	16
	-0.9	0.533147	0.956861	0.14286	0.124344	0.365237	4.42155	0.784133	2.84682	0.343949	0.942403	0.26371	0.29204	2.53554	0.88123	2.80577	0.779372		1.23513	0.334537	16		-0.9	0.219268	0.048905	0.170885	0.153583	0.38194	5.58123	9.18202	0.801051	0.401998	2.57148	1.77181	1.81652	2.82653	2.47117	5.72011	0.710639		2.15645	0.652123	16
	-0.8	0.291059	0.814992	0.14286	0.124344	0.365237	4.56414	0.784133	2.97673	0.343949	0.942403	0.26371	0.29204	2.53554	1.13888	2.84258	0.779372		1.25996	0.35365	16		-0.8	0.219268	0.048905	0.170885	0.153583	0.38194	5.18772	10.0506	1.23401	0.401998	2.81937	1.80659	2.21563	2.96582	2.36692	5.06339	0.710639		2.1899	0.67236	16
	-0.7	0.291059	0.814992	0.14286	0.124344	0.365237	5.05131	0.784133	2.99762	0.343949	0.942403	0.26371	0.29204	2.53554	0.951641	2.71326	0.779372		1.26443	0.368787	16		-0.7	0.219268	0.048905	0.170885	0.153583	0.38194	5.89591	9.92802	1.23401	0.401998	2.60618	1.82955	2.13253	3.26424	2.26727	5.83706	0.710639		2.31514	0.690608	16
	-0.6	0.291059	0.741432	0.14286	0.124344	0.365237	4.69631	0.887992	2.76232	0.343949	1.07664	0.26371	0.29204	2.2211	1.05459	2.47227	0.779372		1.20872	0.337471	16		-0.6	0.219268	0.048905	0.170885	0.153583	0.38194	6.92437	9.52692	1.23401	0.401998	2.65227	2.0406	1.97429	4.42754	1.9086	6.07224	0.710639		2.38582	0.719021	16
	-0.5	0.291059	0.741432	0.14286	0.124344	0.365237	5.06393	0.887992	2.80124	0.343949	1.03633	0.26371	0.29204	2.31146	1.05459	2.48731	0.779372		1.2769	0.375072	16		-0.5	0.219268	0.048905	0.170885	0.153583	0.38194	6.19717	9.13528	1.23401	0.401998	2.99579	1.9818	1.83766	3.64356	1.9086	5.77812	0.710639		2.27188	0.668928	16
	-0.4	0.291059	0.756992	0.14286	0.124344	0.365237	4.3207	1.03156	2.91	0.343949	1.03633	0.26371	0.29204	2.78889	0.929196	2.4627	0.779372		1.24332	0.342793	16		-0.4	0.219268	0.048905	0.170885	0.153583	0.38194	5.16652	9.33456	1.23401	0.401998	3.11081	2.12066	1.88862	3.63563	2.36011	6.60507	0.710639		2.35715	0.670742	16
	-0.3	0.291059	0.756992	0.14286	0.124344	0.365237	4.81499	1.33546	3.04246	0.343949	1.25001	0.26371	0.29204	2.97031	1.13984	2.52056	2.30359		1.42899	0.367045	16		-0.3	0.219268	0.048905	0.170885	0.153583	0.38194	6.34345	9.14425	1.23401	0.401998	2.87285	2.28442	1.88862	3.90238	2.6472	6.00725	0.710639		2.42651	0.6728	16
	-0.2	0.291059	0.836137	0.14286	0.124344	0.365237	4.62981	1.45513	3.08061	0.343949	1.24628	0.26371	0.29204	3.00314	1.13984	3.3479	2.30359		1.51535	0.389021	16		-0.2	0.219268	0.048905	0.170885	0.153583	0.38194	6.3454	9.60204	1.84331	0.401998	2.95763	2.52741	1.7299	3.76528	2.78873	6.57773	0.710639		2.50174	0.70504	16
	-0.1	0.291059	0.899212	0.14286	0.124344	1.35801	4.9407	1.45513	3.70899	0.343949	1.24628	0.26371	0.37456	4.30733	1.63858	3.80425	5.23983		1.93061	0.476986	16		-0.1	0.219268	0.048905	0.170885	0.153583	0.38194	6.43476	9.90185	3.45899	0.401998	2.95763	2.42669	1.86639	5.52197	2.78947	7.56582	0.710639		2.71518	0.762737	16
	0	0.291059	0.899212	0.14286	0.124344	1.28537	6.35487	1.96926	5.25199	0.343949	1.75335	0.26371	0.563038	9.32452	2.54693	6.678	7.50344		2.91676	0.797169	16		0	0.603775	0.048905	0.170885	0.153583	0.38194	7.57935	10.1202	4.76439	0.401998	3.6801	2.58951	1.84836	15.2831	2.93955	7.37081	1.12722		3.56835	1.09192	16
	0.1	0.291059	0.899212	67.922	3.8992	3.42452	10.615	2.39796	11.5157	0.343949	2.75617	0.572494	0.563038	22.8814	4.29407	12.3014	12.9804		9.80044	4.18668	16		0.1	2.87564	0.048905	59.7655	0.153583	1.50204	11.5608	10.2528	9.04798	0.401998	4.36565	4.09444	1.90772	22.2633	3.97368	10.4379	6.39182		9.26145	3.66103	16
	0.2	4.34123	1.38193	65.731	13.4405	11.5511	14.6085	4.58837	18.7848	7.16008	4.66331	6.9135	0.563038	18.9217	7.54235	16.9882	20.0044		13.6741	3.83981	16		0.2	6.51803	0.048905	49.9683	1.67838	1.38023	15.1011	12.361	14.7387	1.32584	5.6837	6.90949	2.14837	21.9821	6.5388	15.4131	9.53256		10.6306	3.0549	16
	0.3	7.05673	4.73689	49.8008	10.8091	34.1868	14.6372	8.93478	21.6639	8.20691	5.1446	6.86548	0.563038	21.0575	8.06347	14.6344	19.616		14.6716	3.13185	16		0.3	7.32729	0.048066	36.0415	2.6343	7.18617	13.4269	12.7927	14.8674	2.77983	4.39141	6.64945	2.42048	11.9549	5.4549	14.8553	12.2616		9.71019	2.13751	16
	0.4	10.8808	4.18847	34.9722	5.51029	41.63	12.9728	8.93478	14.4367	3.55574	4.3689	5.87612	0.740406	18.5859	7.98847	12.565	17.4921		12.8793	2.81831	16		0.4	4.32918	0.048066	33.8493	1.04472	15.9233	12.7473	13.7496	13.4023	1.07212	3.72109	6.01143	2.73252	10.1346	4.15589	15.3865	7.40307		9.16009	2.14229	16
	0.5	7.64102	3.57255	19.4313	1.48624	34.6662	13.1359	9.90572	9.32116	2.79417	3.38347	3.53517	0.839807	12.1229	8.18295	11.1194	17.4208		9.85875	2.15449	16		0.5	2.10844	0.048066	13.3984	0.652669	17.9255	9.99136	12.5327	8.80551	0.757694	3.90664	4.07304	3.98789	7.85415	4.63887	13.4295	8.1105		6.95281	1.33559	16
	0.6	5.04435	4.65458	4.60095	0.227428	16.0482	11.3593	7.8584	6.20983	0.528764	1.75924	1.59504	2.24633	5.70572	3.95648	6.0722	15.2846		5.69847	1.19843	16		0.6	0.402371	0.049774	1.0164	0.358099	15.6752	10.2563	11.4573	4.13004	0.402857	2.9184	3.73719	6.54767	2.25269	3.31794	12.138	3.67815		4.93948	1.22279	16
	0.7	1.47469	5.04549	1.58175	0.124999	4.34926	8.86705	5.42303	3.13642	0.364735	1.12341	0.26795	4.25198	2.05844	1.13363	4.10606	10.5438		3.32802	0.762122	16		0.7	0.402371	0.485388	0.170824	0.353611	7.0097	8.68479	10.4474	1.44902	0.402857	2.31383	2.25797	6.73392	1.55506	2.8663	10.2053	1.82414		3.58158	0.925612	16
	0.8	0.548922	5.32901	0.142579	0.124999	0.37156	9.3403	2.70206	2.39982	0.364735	0.92021	0.26795	1.39892	0.999658	0.582112	2.16181	6.60741		2.13637	0.672216	16		0.8	0.543441	0.504657	0.170824	0.151464	4.08065	6.72315	10.2708	1.06049	0.402857	2.01895	1.58202	6.03367	1.55506	2.02364	7.09028	1.1417		2.84348	0.767193	16
	0.9	0.548922	5.21454	0.142579	0.124999	0.37156	7.33454	2.40644	2.05401	0.364735	0.92021	0.26795	1.08517	0.960793	0.582112	1.67223	4.86506		1.82655	0.537791	16		0.9	0.219422	0.343371	0.170824	0.151464	1.8689	5.86445	10.7487	0.748154	0.402857	1.86327	1.58202	5.70997	1.63309	1.93362	6.10468	1.1417		2.53246	0.750975	16
	1	0.548922	3.61233	0.142579	0.124999	0.37156	6.38532	1.48607	2.06312	0.364735	1.20064	0.26795	1.16603	0.92922	0.582112	1.47789	1.9707		1.44231	0.405583	16		1	0.219422	1.34636	0.170824	0.151464	0.852846	4.33647	9.74874	0.748154	0.402857	1.86327	1.68409	7.38316	1.69948	1.76001	5.75582	0.710783		2.42916	0.71671	16
	1.1	0.548922	1.94519	0.142579	0.124999	0.37156	5.17662	1.26344	1.90136	0.364735	1.20064	0.26795	0.300838	0.901969	0.582112	1.58416	1.51286		1.17517	0.319928	16		1.1	0.219422	0.582164	0.170824	0.151464	0.367682	5.60748	9.66076	0.748154	0.402857	1.95145	1.53591	4.73109	2.50102	2.31033	6.04371	0.710783		2.358	0.690208	16
	1.2	0.548922	1.34884	0.142579	0.124999	0.37156	4.72915	1.08299	2.93963	0.364735	0.793722	0.26795	0.300838	0.901969	0.582112	1.62386	0.785035		1.03845	0.295171	16		1.2	0.219422	0.049168	0.170824	0.151464	0.367682	4.81875	9.48347	0.748154	0.402857	1.95145	1.28348	4.23072	2.08254	2.40696	4.7607	0.710783		2.10941	0.64373	16
	1.3	0.548922	0.943276	0.142579	0.124999	0.37156	5.03726	1.08299	2.71693	0.364735	0.793722	0.26795	0.300838	1.02374	0.524718	1.4602	0.785035		1.02875	0.310901	16		1.3	0.219422	0.049168	0.170824	0.151464	0.367682	4.50476	8.38133	0.748154	0.402857	2.42063	1.28348	4.17642	2.38831	2.59125	5.3113	0.710783		2.11187	0.598952	16
	1.4	0.548922	0.943276	0.142579	0.124999	0.37156	4.72084	0.989394	1.97487	0.364735	0.793722	0.26795	0.300838	1.29884	0.524718	1.5573	0.785035		1.02172	0.293567	16		1.4	0.219422	0.049168	0.170824	0.151464	0.367682	4.62436	8.13584	0.739511	0.402857	2.55971	1.33529	4.06432	2.31038	2.53999	5.01825	0.710783		2.08254	0.58221	16
	1.5	0.548922	0.753129	0.142579	0.124999	0.37156	4.71989	0.989394	1.93933	0.364735	0.812674	0.26795	0.300838	1.86633	0.524718	1.41083	0.785035		1.04993	0.302132	16		1.5	0.219422	0.049168	0.170824	0.151464	0.367682	5.14977	7.99521	0.943003	0.402857	2.66078	1.33233	3.02771	3.0349	2.66265	4.34511	0.710783		2.05881	0.567038	16
	1.6	0.548922	0.753129	0.142579	0.124999	0.37156	3.75649	0.769957	1.98488	0.364735	0.812674	0.26795	0.300838	1.86633	0.524718	1.65824	0.785035		0.992577	0.258923	16		1.6	0.219422	0.049168	0.170824	0.151464	0.367682	4.32297	8.20413	0.98016	0.402857	2.21076	1.47859	2.08434	3.09181	2.51105	4.56735	0.710783		1.96178	0.555961	16
	1.7	0.548922	0.753129	0.142579	0.124999	0.37156	3.24332	0.722095	1.94428	0.364735	1.129	0.26795	0.300838	1.86633	0.524718	1.79516	0.785035		0.998972	0.246173	16		1.7	0.219422	0.049168	0.170824	0.151464	0.367682	5.72257	8.36252	0.740511	0.402857	1.81182	1.47859	1.90626	2.30058	2.0588	5.77823	0.710783		2.02105	0.615654	16
	1.8	0.548922	0.753129	0.142579	0.124999	0.37156	3.48884	0.722095	1.849	0.364735	1.14706	0.26795	0.300838	1.86633	0.715731	1.74819	0.785035		1.03905	0.262032	16		1.8	0.219422	0.049168	0.170824	0.151464	0.367682	4.25967	8.01845	0.740511	0.402857	2.30831	1.69861	1.75969	2.65678	2.16991	6.46168	0.710783		1.9917	0.594837	16
	1.9	0.548922	0.770815	0.142579	0.124999	0.37156	3.58506	0.722095	2.11375	0.364735	1.07008	0.26795	0.300838	1.86633	0.715731	1.40365	0.785035		1.02631	0.26647	16		1.9	0.219422	0.049168	0.170824	0.151464	0.367682	4.25974	8.48882	0.797657	0.402857	2.45259	1.69861	1.83167	3.66202	1.96687	6.4776	0.710783		2.08575	0.623205	16
	2	0.548922	0.919079	0.142579	0.124999	0.37156	3.49495	0.722095	2.27402	0.364735	1.03834	0.26795	0.300838	1.86633	0.715731	1.33879	0.785035		1.03777	0.270641	16		2	0.219422	0.049168	0.170824	0.151464	0.367682	4.27912	9.37157	0.837649	0.402857	2.42164	1.89507	1.83167	3.13592	2.22118	7.3659	0.710783		2.19613	0.683147	16
	spike frequency during bursts in substance P (% change from baseline)																						One-way analysis of variance
		Bio Rep #1	Bio Rep #2	Bio Rep #3	Bio Rep #4	Bio Rep #5	Bio Rep #6	Bio Rep #7	Bio Rep #8	Bio Rep #9	Bio Rep #10	Bio Rep #11	Bio Rep #12	Bio Rep #13	Bio Rep #14	Bio Rep #15	Bio Rep #16		Mean	SE	N		P value	0.114
	All Neurons	-34.6347	-92.3638	-20.3717	-79.9196	-50.5102	-8.27669	96.8203	-22.8509	-66.4374	24.5348	41.0348	211.974	-21.404	-17.5355	28.7181	-58.7507		-4.373	18.87	16		F	2.371
	Excitatory	-34.6347	-92.3638	-20.3717	-79.9196	-50.5102													-55.56	13.51	5		R square	0.1595
	Inhibitory	-8.27669	96.8203	-22.8509	-66.4374	24.5348	41.0348	211.974											39.54	34.73	7

## Sheet: Fig.8D
	Onset Times = Neuron Burst Time - Population Burst Time
	Excitatory					Inhibitory
	Baseline		substance P			Baseline		substance P
	(n)	(n+1)	(n)	(n+1)		(n)	(n+1)	(n)	(n+1)
	0.1857	0.194453	0.127875	0.2525		0.117953	0.070797	0.143125	0.097
	0.194453	-0.0663	0.2525	0.266563		0.070797	0.0705	0.097	0.130313
	-0.0663	0.323156	0.266563	0.464562		0.0705	0.143453	0.130313	0.163563
	0.323156	0.23225	0.464562	0.222875		0.143453	0.095844	0.163563	0.081187
	0.23225	0.138047	0.222875	0.37425		0.095844	0.1015	0.081187	0.097688
	0.138047	0.267703	0.37425	0.189		0.1015	0.088703	0.097688	0.133812
	0.267703	0.064797	0.189	0.1535		0.088703	0.067391	0.133812	0.106562
	0.064797	0.129203	0.1535	0.099438		0.067391	0.068797	0.106562	0.245188
	0.129203	0.299844	0.099438	0.311688		0.068797	0.085656	0.245188	0.143375
	0.299844	0.101797	0.311688	0.228375		0.085656	0.087406	0.143375	0.135313
	0.101797	0.26075	0.228375	0.142625		0.087406	0.090891	0.135313	0.226063
	0.26075	0.18775	0.142625	0.23975		0.090891	0.0845	0.226063	0.134437
	0.18775	0.099906	0.23975	0.1815		0.0845	0.071953	0.134437	0.118625
	0.099906	0.309297	0.1815	0.201737		0.071953	0.071	0.118625	0.106562
	0.309297	0.343547	0.201737	0.293812		0.071	0.155656	0.106562	0.124437
	0.343547	0.131844	0.293812	0.020437		0.155656	0.047953	0.124437	0.093563
	0.131844	0.19775	0.020437	0.166125		0.047953	0.080203	0.093563	0.086125
	0.19775	0.112203	0.166125	0.115687		0.080203	0.080203	0.086125	0.07525
	0.112203	0.125547	0.115687	0.369125		0.080203	0.066297	0.830062	0.051062
	0.158063	-0.02437	0.25	0.050125		0.114187	0.1275	0.051062	0.104625
	-0.02437	0.105437	0.050125	0.220125		0.1275	0.135203	0.104625	0.115313
	0.105437	0.165562	0.220125	0.308875		0.135203	0.099156	0.115313	0.0295
	0.165562	0.131062	0.308875	0.40725		0.099156	0.0695	0.0295	0.072
	0.131062	0.140687	0.40725	0.282		0.0695	0.059125	0.072	0.055875
	0.140687	0.090687	0.282	0.2155		0.059125	0.058	0.055875	0.086563
	0.090687	0.096625	0.2155	0.3795		0.058	0.153469	0.086563	0.08125
	0.096625	0.124188	0.3795	0.2965		0.153469	0.060219	0.08125	0.005437
	0.124188	0.103188	0.2965	0.256875		0.060219	0.12025	0.005437	0.04425
	0.103188	0.12	0.256875	0.460125		0.12025	0.075906	0.04425	0.002375
	0.12	0.140813	0.460125	0.48625		0.075906	0.093156	0.002375	0.061687
	0.140813	0.147312	0.48625	0.26475		0.093156	0.046312	0.061687	0.058
	0.147312	0.146125	0.26475	0.1335		0.046312	0.062594	0.058	-0.02606
	0.146125	0.226813	0.1335	0.372375		0.062594	0.04025	-0.02606	0.0395
	0.226813	0.17025	0.372375	0.232375		0.04025	0.079187	0.0395	-0.03594
	0.17025	0.235875	0.232375	0.245875		0.079187	0.03475	-0.03594	-0.00281
	0.235875	0.116375	0.245875	0.305375		0.03475	0.081219	-0.00281	0.03425
	0.116375	0.100375	0.04375	0.075156		0.081219	0.0505	0.03425	0.043063
	0.100375	0.07525	0.075156	0.06475		0.0505	0.100469	0.049625	-0.07156
	0.035449	0.023297	0.06475	0.029		-0.02237	0.118875	-0.07156	0.237937
	0.023297	0.03025	0.029	0.115313		0.118875	0.1325	0.237937	0.00925
	0.03025	0.048547	0.115313	0.049188		0.1325	0.258625	0.00925	-0.03669
	0.048547	0.037898	0.049188	0.063906		0.258625	0.116281	-0.03669	0.0045
	0.037898	0.056648	0.063906	0.112156		0.116281	0.045312	0.0045	0.056063
	0.056648	0.043703	0.112156	0.022063		0.045312	0.204969	0.056063	0.086125
	0.043703	0.040047	0.022063	0.10975		0.204969	0.020375	0.086125	-0.21338
	0.040047	0.05675	0.10975	0.07375		0.020375	0.238656	-0.21338	0.081625
	0.05675	0.043953	0.07375	0.102625		0.238656	0.14825	0.081625	0.071563
	0.043953	0.06225	0.102625	0.036625		0.14825	0.052219	0.520469	0.207031
	0.06225	0.067594	0.036625	0.139875		0.052219	0.155562	0.207031	0.220219
	0.067594	0.068547	0.139875	0.077938		0.155562	-0.06416	0.220219	0.341094
	0.068547	0.097547	0.077938	0.171625		-0.06416	0.099344	0.341094	0.05975
	0.097547	0.039656	0.171625	0.063625		0.099344	0.070063	0.05975	0.337125
	0.039656	0.037953	0.063625	0.097125		0.070063	0.095406	0.337125	0.282313
	0.037953	0.032797	0.097125	0.059375		0.095406	0.020844	0.282313	0.344438
	0.032797	0.052656	0.059375	0.142812		0.020844	0.065219	0.344438	0.149563
	0.052656	0.033906	0.237094	0.299438		0.065219	0.051344	0.149563	0.252813
	0.033906	0.06325	0.299438	0.284844		0.350203	0.386797	0.252813	0.355875
	0.178	0.079148	0.284844	0.097094		0.386797	0.326156	0.355875	0.31725
	0.079148	0.0835	0.097094	0.1085		0.326156	0.349609	0.31725	0.273312
	0.0835	0.083047	0.1085	0.1445		0.349609	0.011562	0.273312	0.377
	0.083047	0.119703	0.1445	0.066625		0.011562	0.327094	0.377	0.590563
	0.119703	0.103852	0.066625	0.113125		0.327094	0.329406	0.590563	0.385125
	0.103852	0.050148	0.113125	0.096313		0.329406	0.483547	0.385125	0.271813
	0.050148	0.078047	0.096313	0.187125		0.483547	0.395594	0.271813	0.28925
	0.078047	0.06275	0.187125	0.119812		0.395594	0.264906	0.28925	0.322687
	0.06275	0.065547	0.119812	0.12025		0.264906	0.3785	0.322687	0.2685
	0.065547	0.074047	0.12025	0.08975		0.3785	0.378594	0.078437	0.17775
	0.074047	0.07175	0.08975	0.248875		0.378594	0.19975	0.17775	0.17775
	0.07175	0.139656	0.248875	0.283875		0.19975	0.382969	0.17775	0.132687
	0.139656	0.138656	0.283875	0.147062		0.382969	0.347406	0.132687	0.196312
	0.138656	0.101953	0.147062	0.131625		0.347406	0.35325	0.196312	0.046438
	0.101953	0.129906	0.131625	0.203		0.35325	0.288594	0.046438	0.166063
	0.129906	0.03475	0.89325	0.819187		0.288594	0.49	0.166063	0.041437
	0.03475	0.12875	0.819187	0.532875		0.49	0.443656	0.041437	0.154687
	0.12875	0.119656	0.532875	0.852188		0.231344	0.24075	0.154687	0.298125
	0.119656	0.125953	0.852188	0.55075		0.24075	0.162703	0.298125	0.082938
	0.221594	0.198094	0.55075	0.7005		0.162703	0.2015	0.082938	0.179375
	0.198094	0.127437	0.7005	0.556375		0.2015	0.073094	0.046125	0.024812
	0.127437	0.162	0.556375	0.802375		0.073094	0.062641	0.024812	0.062562
	0.162	0.094812	0.802375	0.700375		0.062641	0.17175	0.062562	0.082
	0.094812	0.159438	0.700375	0.612062		0.17175	-0.07644	0.082	0.049313
	0.159438	0.139187				-0.07644	0.146937	0.049313	0.038563
	0.139187	0.160906				0.146937	0.170594	0.038563	0.146312
	0.160906	0.153562				0.170594	0.140781	0.146312	0.088938
	0.153562	0.1575				0.140781	0.119813	0.088938	0.116
	0.1575	0.13925				0.119813	0.187938	0.116	0.040875
	0.13925	0.176844				0.187938	0.079844	0.040875	-0.02019
	0.176844	0.460313				0.079844	0.188219	-0.02019	-0.1935
	0.460313	0.1665				0.188219	0.10925	-0.1935	0.1145
	0.1665	0.274156				0.10925	0.161406	0.1145	-0.03012
	0.274156	0.183594				0.161406	0.163719	-0.03012	-0.10475
	0.183594	0.228313				0.163719	0.008625	-0.10475	0.055687
	0.228313	0.229062				0.067301	0.073602	0.055687	0.030938
	0.229062	0.244094				0.073602	0.073352	0.030938	0.102375
	0.244094	0.17555				0.073352	0.085602	0.102375	0.187437
						0.085602	-0.0228	0.187437	0.025375
						-0.0228	0.097297	0.090562	0.071063
						0.097297	0.098805	0.071063	0.112125
						0.098805	0.090695	0.112125	0.104187
						0.090695	0.040406	0.104187	0.06925
						0.040406	0.085102	0.06925	-0.03881
						0.085102	0.070805	-0.03881	0.064875
						0.070805	0.063102	0.064875	0.081375
						0.063102	0.098102	0.081375	0.5465
						0.098102	0.086648	0.5465	0.049375
						0.086648	0.073	0.049375	0.191875
						0.073	0.08225	0.191875	0.22025
						0.08225	0.119547	0.22025	0.061625
						0.119547	0.067391	0.061625	0.05125
						0.067391	0.21475	0.05125	0.00725
						0.21475	0.075906	0.00725	-0.01737
						0.147	0.105398	-0.01737	0.06225
						0.105398	0.124852	0.06225	0.08775
						0.124852	0.0095
						0.0095	0.041
						0.041	0.086398
						0.086398	0.0595
						0.0595	0.094
						0.094	-0.11809
						-0.11809	0.1585
						0.1585	0.04875
						0.04875	0.075891
						0.075891	0.038938
						0.038938	0.10525
						0.10525	0.054859
						0.054859	0.013609
						0.013609	0.017141
						0.017141	0.157141
						0.157141	0.267109
						0.267109	0.100703

## Sheet: Fig.8E
	Rostral Neurons Onset Jitter [ln(RMSSD)]
	Excitatory Neurons													Paired t test (two-tailed)
		Bio Rep #1	Bio Rep #2	Bio Rep #3	Bio Rep #4	Bio Rep #5				Mean	SE	N		P value	0.0405
	Baseline	-1.81151	-2.6834	-3.89823	-3.08014	-2.24893				-2.744	0.358	5		t, df	t=2.985 df=4
	substance P	-1.9077	-1.97013	-2.7138	-2.50419	-1.55401				-2.13	0.2107	5
	Inhibitory Neurons													Paired t test (two-tailed)
		Bio Rep #1	Bio Rep #2	Bio Rep #3	Bio Rep #4	Bio Rep #5	Bio Rep #6	Bio Rep #7		Mean	SE	N		P value	0.03
	Baseline	-3.2097	-3.10401	-2.08014	-1.91009	-2.22395	-2.74805	-2.22016		-2.499	0.1957	7		t, df	t=2.828 df=6
	substance P	-2.83899	-1.68579	-1.68055	-1.86658	-2.1239	-2.1759	-1.71969		-2.013	0.1578	7

## Sheet: Fig.8F
	Inhibitory Rostral Neurons: IBI Spike Frequency (Hz)
	Baseline													substance P
	Bin Center (a.u.)	Bio Rep #1	Bio Rep #2	Bio Rep #3	Bio Rep #4	Bio Rep #5	Bio Rep #6	Bio Rep #7		Mean	SE	N		Bin Center (a.u.)	Bio Rep #1	Bio Rep #2	Bio Rep #3	Bio Rep #4	Bio Rep #5	Bio Rep #6	Bio Rep #7		Mean	SE	N
	0.025	5.50572	1.10073	2.30092	0.364735	1.01798	0.268411	0.188362		1.53527	0.717076	7		0.025	4.85839	9.98697	1.1117	0.413809	1.88798	1.29035	6.50938		3.72265	1.33938	7
	0.075	4.7146	1.10073	2.26174	0.364735	1.49419	0.268411	0.188362		1.48468	0.609405	7		0.075	7.22901	8.97484	1.1117	0.413809	2.89614	1.24712	2.62832		3.50014	1.24698	7
	0.125	3.73945	0.916524	2.74339	0.364735	1.44762	0.268411	0.188362		1.38121	0.519423	7		0.125	5.74844	8.14821	1.19348	0.413809	2.22729	1.28478	1.89841		2.98778	1.07749	7
	0.175	2.91019	0.823867	1.87506	0.364735	1.47288	0.268411	0.188362		1.12907	0.382664	7		0.175	5.4008	8.83342	1.01851	0.413809	2.49165	1.44744	2.81293		3.20265	1.12148	7
	0.225	4.02808	0.665762	2.23477	0.364735	1.49022	0.268411	0.188362		1.32005	0.532882	7		0.225	5.42791	8.55869	1.01851	0.413809	2.59555	1.49464	3.82497		3.33344	1.08825	7
	0.275	4.08188	0.665762	2.70011	0.364735	1.01259	0.268411	0.188362		1.32598	0.563871	7		0.275	5.16296	9.80581	1.0108	0.413809	2.43805	1.48838	2.99412		3.33056	1.22939	7
	0.325	3.95508	0.665762	2.26234	0.343949	1.13736	0.268411	0.188362		1.26018	0.525699	7		0.325	4.24636	10.1309	0.859988	0.413809	2.92066	1.91654	2.68883		3.311	1.23703	7
	0.375	3.83434	0.675812	2.28521	0.343949	1.10296	0.252355	0.454511		1.27845	0.501074	7		0.375	5.4929	9.08166	0.855032	0.413809	3.12855	2.03965	2.75628		3.39541	1.13802	7
	0.425	4.95324	0.66798	2.33684	0.343949	0.876107	0.252355	0.211002		1.37735	0.657484	7		0.425	5.6737	10.1678	0.855032	0.413809	2.54515	2.16363	2.56551		3.48352	1.28428	7
	0.475	5.00654	0.675473	2.57081	0.343949	0.479609	0.252355	0.208786		1.3625	0.682981	7		0.475	6.94045	9.61484	0.855032	0.413809	2.80642	2.00525	2.55051		3.59804	1.28451	7
	0.525	4.73934	1.07689	2.65648	0.343949	0.479609	0.252355	0.227933		1.39665	0.645266	7		0.525	8.14741	9.36577	0.855032	0.413809	2.34096	1.90898	2.89818		3.7043	1.34935	7
	0.575	5.29228	0.979546	2.4918	0.343949	0.868387	0.252355	0.227933		1.49375	0.699418	7		0.575	6.65066	9.18258	0.751665	0.413809	2.78463	1.78252	2.7111		3.46814	1.22836	7
	0.625	5.29685	1.37251	2.85972	0.343949	0.868387	0.252355	0.233274		1.60386	0.708825	7		0.625	5.84901	9.40163	0.847835	0.413809	2.43114	2.04194	2.16882		3.30774	1.21192	7
	0.675	4.25289	1.43019	2.31119	0.343949	1.17278	0.26795	0.265516		1.43492	0.549828	7		0.675	7.25152	10.2243	1.06827	0.413809	3.16154	2.32174	1.63732		3.7255	1.37447	7
	0.725	4.54967	1.10753	2.58187	0.343949	0.99419	0.26795	0.262069		1.44389	0.602487	7		0.725	6.3505	9.84458	1.42754	0.413809	3.93289	2.87584	1.94623		3.82734	1.23866	7
	0.775	4.35602	1.11198	2.64543	0.343949	1.01587	0.26795	0.278761		1.43142	0.580777	7
	0.825	4.9072	1.03414	2.87793	0.343949	1.48186	0.26795	0.278761		1.59883	0.654699	7
	0.875	4.84466	1.19687	3.17811	0.343949	1.54374	0.26795	0.272316		1.66394	0.659547	7
	0.925	4.7798	1.63258	3.25036	0.343949	1.69768	0.26795	0.386785		1.76559	0.64508	7
	0.975	5.29577	2.04255	3.56658	0.343949	1.85131	0.26795	0.386785		1.96498	0.718407	7
	Average IBI Spike Freq (Hz)													Paired t test (two-tailed)
		Bio Rep #1	Bio Rep #2	Bio Rep #3	Bio Rep #4	Bio Rep #5	Bio Rep #6	Bio Rep #7		Mean	SE	N		P value	0.1414
	Baseline	4.55218	1.04716	2.59953	0.350185	1.17527	0.263433	0.250648		1.463	0.6023	7		t, df	t=1.693 df=6
	substance P	6.02867	9.42146	0.98934	0.413809	2.70591	1.82059	2.83939		3.46	1.207	7
	Average IBI spike slope (Hz/sec)													Paired t test (two-tailed)
		Bio Rep #1	Bio Rep #2	Bio Rep #3	Bio Rep #4	Bio Rep #5	Bio Rep #6	Bio Rep #7		Mean	SE	N		P value	0.8783
	Baseline	0.022924	0.885299	-0.18436	0	0.265838	0	-0.23305		0.1081	0.1432	7		t, df	t=0.1598 df=6
	substance P	0.429361	0.272529	-0.23506	0	0.09481	0.595435	-0.57652		0.08294	0.1513	7
